# Supplementary material for: Synthesis of 2-styryl-quinazoline and 3-styryl-quinoxaline based sulfonate esters via sp3 C–H activation and their evaluation for α-glucosidase inhibition
Source: Royal Society of Chemistry journal article supplement (doi:10.1039/d1nj05644a), 2022-01-01

## Synthesis of 2-styryl-quinazoline and 3-styryl-quinoxaline based sulfonate esters *via* sp<sup>3</sup> C-H activation and their biological evaluation for $\alpha$ -glucosidase inhibition

Neeli Satyanarayana,<sup>a</sup> Boddu Ramya Sree,<sup>b</sup> Kota Sathish,<sup>a</sup> Sakkani Nagaraju,<sup>a</sup> Kalivarathan Divakar,<sup>b,c\*</sup> Ravinder Pawar,<sup>a</sup> Thangellapally Shirisha,<sup>a</sup> Dhurke Kashinath<sup>a\*</sup>

<sup>a</sup>Department of Chemistry, National Institute of Technology, Warangal-506 004, India

<sup>b</sup>Department of Biotechnology, National Institute of Technology, Warangal-506 004, India

<sup>c</sup>Department of Biotechnology, Sri Venkateswara College of Engineering (Autonomous), Sriperumbudur - 602 117, Tamil Nadu, India.

Corresponding Author: e-mail: kashinath@nitw.ac.in; kashinath.dhurke@gmail.com

Tel. +91-870-2462677

| S. No. | Contents                                                             | Page No. |
|--------|----------------------------------------------------------------------|----------|
| 1      | Experimental procedures                                              | 1-2      |
| 2      | Characterization of new compounds                                    | 2-16     |
| 3      | <sup>1</sup> H NMR, <sup>13</sup> C NMR and Mass spectra of products | 16-66    |
| 4      | NOESY spectrum of compound <b>5e</b>                                 | 66       |

**General:** Starting materials are bought from the SD-Fine, Sigma-Aldrich and Spectrochem and used without further purification. <sup>1</sup>H and <sup>13</sup>C-NMR spectra were recorded on Bruker 400 MHz spectrometer using CDCl<sub>3</sub> or DMSO-d<sub>6</sub> solvents and reported in  $\delta$  ppm. The mass spectra are recorded on agilent 6530Q-TOF LC/HRMS. Melting points were recorded using Stuart melting point apparatus.

### 1. Experimental procedures.

**Representative procedure for the synthesis of 2-(2-(6-Chloro-4-phenylquinazolin-2-yl)vinyl)phenyl methanesulfonate (3a):** To a solution of 6-chloro-2-methyl-4-phenylquinazoline (**1a**) (25 mg, 0.1 mmol) in EtOH (3 mL) were added sulfonate aldehyde (**2a**) (20 mg, 0.1 mmol), NEt<sub>3</sub> (0.0139 mL, 10 mol%). The mixture was heated at 80 °C for 6 h till the completion of the reaction (TLC monitoring), cooled to room temperature. The solvent was removed under reduced pressure to give the crude product which was purified by silica gel column chromatography. Elution of the column with EtOAc + hexanes (30/70 v/v) afford pure product **3a** as white solid (36 mg, 85%).

**Representative procedure for the synthesis of (E)-2-(2-(3-Hydroxyquinoxalin-2-yl)vinyl)phenyl methanesulfonate (5a):** To a solution of 3-methylquinoxalin-2-ol (**4**) (16 mg, 0.1 mmol), in EtOH (3 mL), sulfonate aldehyde (**2a**) (20 mg, 0.1 mmol), NEt<sub>3</sub> (0.014 mL, 10 mol%) were added and the mixture was heated at 80 °C for 5 h. After the completion of reaction (monitored by TLC), the mixture was cooled to room temperature. Evaporation of the solvent gave the crude product which was purified by silica gel column chromatography. Elution of the column using EtOAc: hexanes (30:70 v/v) gave desired product **5a** as yellow solid (28 mg, 84%).

## 2. Characterization of new compounds

**2-(2-(6-Chloro-4-phenylquinazolin-2-yl)vinyl)phenyl methanesulfonate (3a):** White solid, mp 173–174 °C, 85% yield. <sup>1</sup>H NMR (400 MHz, CDCl<sub>3</sub>) δ 8.25 (d, *J* = 8.8 Hz, 2H), 8.11 (d, *J* = 8.8 Hz, 1H), 7.75–7.69 (m, 3H), 7.57 (*J* = 2.4 Hz, 1H), 7.54–7.52 (m, 3H), 7.50 (d, *J* = 1.8 Hz, 1H) 7.43 (d, *J* = 15.6 Hz, 1H), 7.37–7.35 (m, 2H), 3.60 (s, 3H); <sup>13</sup>C NMR (100 MHz, CDCl<sub>3</sub>+DMSO-d<sub>6</sub>) δ 160.13, 155.23, 152.96, 147.34, 137.61, 132.85, 131.92, 130.42, 130.26, 129.44, 128.98, 128.21, 127.94, 127.60, 125.62, 123.73, 123.06, 122.20, 115.70, 115.42, 26.80; HRMS (ESI, *m/z*): calcd. For C<sub>23</sub>H<sub>17</sub>ClN<sub>2</sub>O<sub>3</sub>SH<sup>+</sup> 437.0732, found 437.0728; IR (KBr thin film, cm<sup>-1</sup>): ν<sub>max</sub> 3085, 2958, 1650, 1421, 1370, 1205, 971, 880.

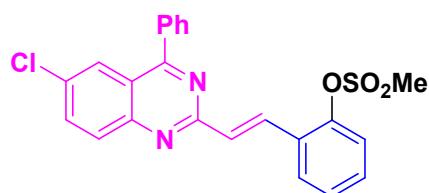

**3a (85%); 6h**

**3-(2-(6-Chloro-4-phenylquinazolin-2-yl)vinyl)phenyl benzenesulfonate (3b):** White solid, mp 180–181 °C, 84% yield. <sup>1</sup>H NMR (400 MHz, CDCl<sub>3</sub>) δ 8.14 – 7.99 (m, 3H), 7.89 (d, *J* = 7.3 Hz, 2H), 7.82 (s, 3H), 7.65 (s, 4H), 7.57 (d, *J* = 5.0 Hz, 3H), 7.32 (t, *J* = 17.0 Hz, 3H), 6.99 (d, *J* = 7.4 Hz, 1H); <sup>13</sup>C NMR (100 MHz, CDCl<sub>3</sub>+DMSO-d<sub>6</sub>) δ 160.81, 156.29, 156.15, 153.74, 149.75, 139.33, 135.84, 134.80, 133.82, 133.22, 132.95, 132.90, 131.47, 131.35, 130.56, 129.91, 129.31, 126.17, 124.78, 124.54, 124.17, 122.97, 116.76, 116.51; HRMS (ESI, *m/z*): calcd. For C<sub>28</sub>H<sub>19</sub>ClN<sub>2</sub>O<sub>3</sub>SH<sup>+</sup> 499.0889, found 499.0893; IR (KBr thin film, cm<sup>-1</sup>): ν<sub>max</sub> 3392, 2963, 1667, 1434, 1368, 1258, 1036, 829.

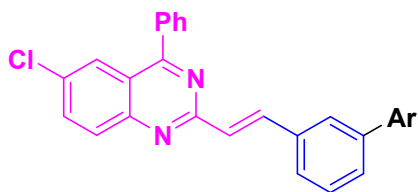

Ar = OSO<sub>2</sub>Ph; **3b** (84%); **5h**

**4-(2-(6-Chloro-4-phenylquinazolin-2-yl)vinyl)phenyl benzenesulfonate (3c):** White solid, mp 215–216 °C, 83% yield. <sup>1</sup>H NMR (400 MHz, CDCl<sub>3</sub>) δ 8.13 (d, *J* = 15.9 Hz, 1H), 8.04 – 7.98 (m, 2H), 7.87 (d, *J* = 7.6 Hz, 2H), 7.81 (d, *J* = 6.8 Hz, 3H), 7.69 (t, *J* = 7.4 Hz, 1H), 7.62 (s, 3H), 7.56 (dd, *J* = 16.5, 8.3 Hz, 4H), 7.36 (d, *J* = 15.9 Hz, 1H), 7.03 (d, *J* = 8.4 Hz, 2H); <sup>13</sup>C NMR (100 MHz, CDCl<sub>3</sub>+DMSO-*d*<sub>6</sub>) δ 166.27, 159.37, 149.16, 135.76, 133.85, 132.72, 131.98, 131.20, 130.25, 129.83, 129.54, 129.46, 129.06, 128.67, 127.98, 125.97, 125.32, 125.00, 124.77, 123.67, 122.46, 120.95; HRMS (ESI, *m/z*): calcd. For C<sub>28</sub>H<sub>19</sub>ClN<sub>2</sub>O<sub>3</sub>SH<sup>+</sup> 499.0889, found 499.0888; IR (KBr thin film, cm<sup>-1</sup>): ν<sub>max</sub> 3420, 2905, 1661, 1416, 1346, 1246, 1025, 827.

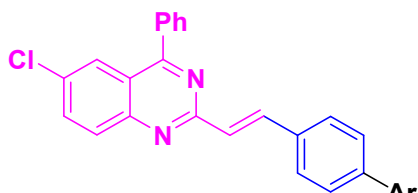

Ar = OSO<sub>2</sub>Ph; **3c** (83%); **5.5h**

**4-(2-(6-Chloro-4-phenylquinazolin-2-yl)vinyl)phenyl methanesulfonate (3d):** White solid, mp 230–231 °C, 82% yield. <sup>1</sup>H NMR (400 MHz, CDCl<sub>3</sub>) δ 8.11 (d, *J* = 15.9 Hz, 1H), 7.93 (dd, *J* = 13.3, 5.5 Hz, 2H), 7.78 – 7.70 (m, 3H), 7.57 (s, 2H), 7.55 (d, *J* = 3.7 Hz, 3H), 7.21 (d, *J* = 9.9 Hz, 1H), 6.87 (d, *J* = 8.6 Hz, 2H), 3.79 (s, 3H); <sup>13</sup>C NMR (100 MHz, CDCl<sub>3</sub>+DMSO-*d*<sub>6</sub>) δ 167.44, 160.35, 150.21, 149.91, 137.21, 136.79, 135.30, 135.06, 132.33, 130.93, 130.58, 130.14, 129.67, 129.13, 129.07, 125.90, 123.05, 122.07, 37.89; HRMS (ESI, *m/z*): calcd. For C<sub>30</sub>H<sub>23</sub>ClN<sub>2</sub>O<sub>4</sub>SH<sup>+</sup> 437.0732, found 437.0727; IR (KBr thin film, cm<sup>-1</sup>): ν<sub>max</sub> 3396, 2999, 2894, 1651, 1558, 1352, 1149, 896, 780.

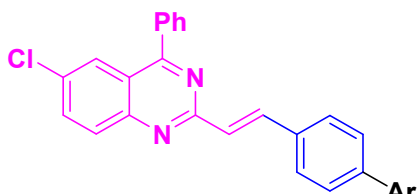

Ar = OSO<sub>2</sub>Me; **3d** (82%); **6h**

**2-(2-(6-Chloro-4-phenylquinazolin-2-yl)vinyl)phenyl-4-methylbenzenesulfonate (3e):** Pale green powder, mp 199–200 °C, 80% yield. <sup>1</sup>H NMR (400 MHz, CDCl<sub>3</sub>+DMSO-*d*<sub>6</sub>) δ 8.05–7.91 (m, 4H), 7.84 (s, 3H), 7.70 (s, 3H), 7.64 (d, *J* = 8.0 Hz, 2H), 7.44–7.39 (m, 2H), 7.29 (d,

$J = 7.2$  Hz, 1H), 7.17 (d,  $J = 15.6$  Hz, 1H), 7.01 (d,  $J = 7.6$  Hz, 2H), 2.13 (s, 3H);  $^{13}\text{C}$  NMR (100 MHz,  $\text{CDCl}_3 + \text{DMSO-d}_6$ )  $\delta$  167.32, 155.52, 147.32, 145.85, 143.87, 136.87, 134.96, 132.60, 131.90, 131.11, 130.84, 130.59, 130.44, 130.10, 130.02, 129.08, 128.40, 127.99, 127.49, 125.88, 123.83, 121.99, 118.12, 116.79, 21.50; HRMS (ESI,  $m/z$ ): calcd. For  $\text{C}_{29}\text{H}_{21}\text{ClN}_2\text{O}_3\text{SH}^+$  513.1045, found 513.1040; IR (KBr thin film,  $\text{cm}^{-1}$ ):  $\nu_{\text{max}}$  3395, 2950, 1636, 1562, 1348, 1154, 975, 856, 765.

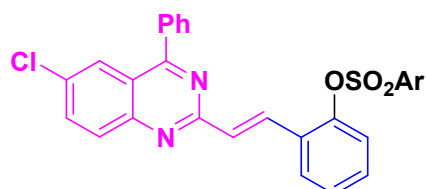

**Ar = 4-Me-C<sub>6</sub>H<sub>4</sub> ; 3e (80%); 5h**

**2-(2-(6-Chloro-4-phenylquinazolin-2-yl)vinyl)-6-methoxyphenyl-4-methylbenzenesulfonate**

**(3f):** Yellow powder, mp 173–174 °C, 82% yield.  $^1\text{H}$  NMR (400 MHz,  $\text{DMSO-d}_6$ )  $\delta$  8.06–8.03 (m, 2H), 8.01 (d,  $J = 4.6$  Hz, 2H), 7.89–7.86 (m, 2H), 7.73–7.70 (m 5H), 7.57 (d,  $J = 7.6$  Hz, 1H), 7.37–7.33 (m, 2H), 7.31 (s, 1H) 7.21 (d,  $J = 8.2$  Hz, 2H), 7.17 (d,  $J = 7.8$  Hz, 1H), 3.64 (s, 3H), 2.08 (s, 3H);  $^{13}\text{C}$  NMR (100 MHz,  $\text{DMSO-d}_6$ )  $\delta$  167.25, 160.11, 153.02, 150.13, 145.68, 137.00, 136.69, 135.32, 133.40, 132.38, 131.87, 131.37, 131.16, 130.93, 130.70, 130.38, 130.25, 129.31, 128.56, 128.47, 125.99, 121.97, 118.87, 114.30, 56.33, 21.36; HRMS (ESI,  $m/z$ ): calcd. For  $\text{C}_{30}\text{H}_{23}\text{ClN}_2\text{O}_4\text{SH}^+$  543.1151, found 543.1142; IR (KBr thin film,  $\text{cm}^{-1}$ ):  $\nu_{\text{max}}$  3396, 2980, 1650, 1534, 1328, 1150, 1070, 862.

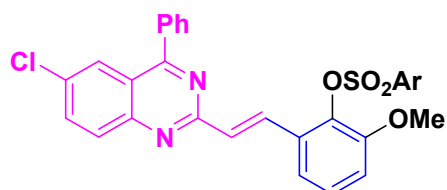

**Ar = 4-Me-C<sub>6</sub>H<sub>4</sub> ; 3f (82%); 6h**

**5-(2-(6-Chloro-4-phenylquinazolin-2-yl)vinyl)-2-methoxyphenyl 4-methylbenzenesulfonate**

**(3g):** White powder, mp 210–211 °C, 81% yield.  $^1\text{H}$  NMR (400 MHz,  $\text{CDCl}_3$ )  $\delta$  8.13 (d,  $J = 15.8$  Hz, 1H), 8.06 – 8.00 (m, 2H), 7.85 – 7.79 (m, 3H), 7.78 (d,  $J = 8.3$  Hz, 2H), 7.66 – 7.60 (m, 3H), 7.38 (d,  $J = 15.9$  Hz, 1H), 7.31 (d,  $J = 8.1$  Hz, 2H), 7.18 (s, 2H), 7.15 (s, 1H), 3.62 (s, 3H), 2.45 (s, 3H);  $^{13}\text{C}$  NMR (100 MHz,  $\text{CDCl}_3 + \text{DMSO-d}_6$ )  $\delta$  155.46, 153.29, 147.03, 145.47, 138.14, 137.46, 135.48, 133.16, 132.21, 132.15, 131.37, 130.17, 129.82, 129.77, 129.57, 129.20, 129.16, 129.11, 128.63, 126.48, 125.41, 119.68, 113.91, 57.10, 17.53; HRMS (ESI,  $m/z$ ): calcd. For  $\text{C}_{30}\text{H}_{23}\text{ClN}_2\text{O}_4\text{SH}^+$  543.1151, found 543.1146; IR (KBr thin film,  $\text{cm}^{-1}$ ):  $\nu_{\text{max}}$  3396, 2980, 1650, 1534, 1328, 1150, 1070, 862.

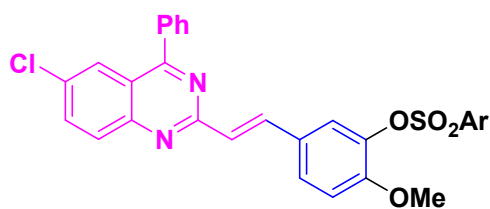

Ar = 4-Me-C<sub>6</sub>H<sub>4</sub>; **3g** (81%); **5.5h**

**2-(2-(6-Chloro-4-phenylquinazolin-2-yl)vinyl)-6-methoxyphenyl benzenesulfonate (3h):**

Yellow powder, mp 225–226 °C, 82% yield. <sup>1</sup>H NMR (400 MHz, CDCl<sub>3</sub>+DMSO-d<sub>6</sub>) δ 8.14 (s, 1H), 8.10 (s, 1H), 8.06–8.03 (m, 1H), 7.98–7.94 (m, 3H), 7.84–7.82 (m, 2H), 7.67–7.62 (m, 2H), 7.55 (s, 1H), 7.51 (s, 1H), 7.39–7.31 (m, 3H), 3.97 (s, 3H); <sup>13</sup>C NMR (100 MHz, CDCl<sub>3</sub>+DMSO-d<sub>6</sub>) δ 168.04, 154.67, 152.53, 146.29, 144.73, 137.39, 136.67, 135.21, 134.15, 133.50, 132.44, 131.40, 129.46, 129.39, 129.04, 128.41, 128.35, 127.90, 127.85, 126.50, 125.70, 124.68, 118.92, 113.06, 56.33; HRMS (ESI, m/z): calcd. For C<sub>29</sub>H<sub>21</sub>ClN<sub>2</sub>O<sub>4</sub>SH<sup>+</sup> 529.0994, found 529.0915; IR (KBr thin film, cm<sup>-1</sup>): ν<sub>max</sub> 3400, 2969, 1650, 1486, 1362, 1147, 1024, 874.

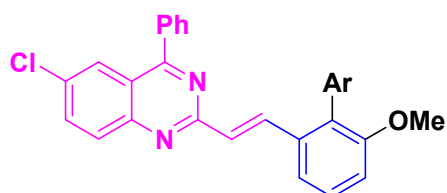

Ar = OSO<sub>2</sub>Ph; **3h** (82%); **6h**

**5-(2-(6-Chloro-4-phenylquinazolin-2-yl)vinyl)-2-methoxyphenyl benzenesulfonate (3i):**

Pale yellow powder, mp 205–206 °C, 80% yield. <sup>1</sup>H NMR (400 MHz, CDCl<sub>3</sub>) δ 8.13 (d, *J* = 16.1 Hz, 1H), 8.05 (s, 1H), 8.01 (d, *J* = 7.8 Hz, 1H), 7.92 (d, *J* = 4.9 Hz, 2H), 7.82 (s, 3H), 7.64 (s, 4H), 7.54 (s, 2H), 7.37 (d, *J* = 15.8 Hz, 1H), 7.21 (t, *J* = 26.1 Hz, 3H), 3.59 (s, 3H); <sup>13</sup>C NMR (100 MHz, CDCl<sub>3</sub>) δ 170.37, 152.18, 149.60, 148.61, 148.55, 144.75, 136.94, 136.25, 135.37, 133.88, 133.30, 132.52, 131.14, 131.01, 130.86, 130.63, 130.53, 130.14, 130.11, 129.62, 128.72, 127.39, 127.29, 126.15, 54.57; HRMS (ESI, m/z): calcd. For C<sub>29</sub>H<sub>21</sub>ClN<sub>2</sub>O<sub>4</sub>SH<sup>+</sup> 529.0994, found 529.2456; IR (KBr thin film, cm<sup>-1</sup>): ν<sub>max</sub> 3080, 2985, 1660, 1490, 1370, 1130, 1010, 835.

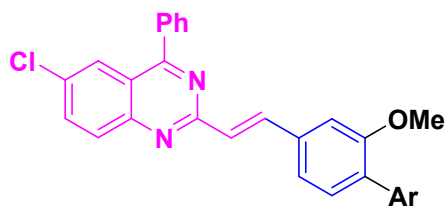

Ar = OSO<sub>2</sub>Ph; **3i** (80%); **6h**

**5-(2-(6-Chloro-4-phenylquinazolin-2-yl)vinyl)-2-methoxyphenyl methanesulfonate (3j):**

White solid, mp 264–265 °C, 81% yield. <sup>1</sup>H NMR (400 MHz, CDCl<sub>3</sub>+DMSO-d<sub>6</sub>) δ 8.27 (d, *J* = 15.6 Hz, 1H), 8.01 (d, *J* = 7.4 Hz, 1H), 7.69 (d, *J* = 15.5 Hz, 1H), 7.58 (d, *J* = 7.2 Hz, 3H), 7.51 (d, *J* = 8.3 Hz, 3H), 7.33 (t, *J* = 8.0 Hz, 1H), 7.28 (s, 1H), 7.19 (s, 1H), 7.10 (d, *J* = 7.8 Hz, 1H), 3.94 (s, 3H), 3.48 (s, 3H); <sup>13</sup>C NMR (100 MHz, CDCl<sub>3</sub>+DMSO-d<sub>6</sub>) δ 168.24, 161.17, 152.86, 150.95, 139.56, 138.46, 137.53, 137.16, 135.87, 133.04, 131.68, 131.36, 130.91, 130.01, 129.85, 126.67, 125.36, 122.82, 121.64, 113.40, 57.31, 39.54; HRMS (ESI, m/z): calcd. For C<sub>24</sub>H<sub>19</sub>ClN<sub>2</sub>O<sub>4</sub>SH<sup>+</sup> 467.0838, found 467.0841; IR (KBr thin film, cm<sup>-1</sup>): ν<sub>max</sub> 3394, 1662, 1508, 1325, 1153, 970, 873.

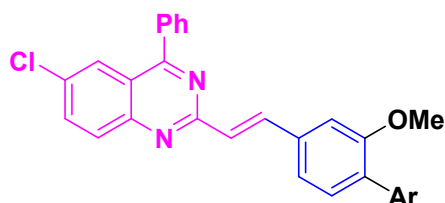

Ar = OSO<sub>2</sub>Me; **3j** (81%); **6h**

**2-(2-(6-Chloro-4-phenylquinazolin-2-yl)vinyl)phenyl-4-nitrobenzene sulfonate (3k):**

Yellow crystalline solid, mp 236–237 °C, 84% yield. <sup>1</sup>H NMR (400 MHz, CDCl<sub>3</sub>+DMSO-d<sub>6</sub>) δ 8.02 (d, *J* = 16.0 Hz, 1H), 7.97–7.94 (m, 2H), 7.80–7.74 (m, 4H), 7.63–7.45 (m, 7H), 7.25–7.22 (m, 2H), 7.19 (s, 1H), 6.90 (d, *J* = 8.0 Hz, 1H); <sup>13</sup>C NMR (100 MHz, CDCl<sub>3</sub>+DMSO-d<sub>6</sub>) δ 167.66, 160.31, 153.03, 151.67, 150.12, 149.45, 139.91, 139.61, 137.09, 136.71, 135.68, 135.35, 132.11, 131.06, 130.56, 130.27, 130.03, 129.51, 129.24, 126.01, 125.62, 125.54, 123.45, 123.03; HRMS (ESI, m/z): calcd. For C<sub>28</sub>H<sub>18</sub>ClN<sub>3</sub>O<sub>5</sub>SH<sup>+</sup> 544.0728, found 544.0744; IR (KBr thin film, cm<sup>-1</sup>): ν<sub>max</sub> 3400, 3105, 1651, 1538, 1347, 1191, 1088, 900, 779.

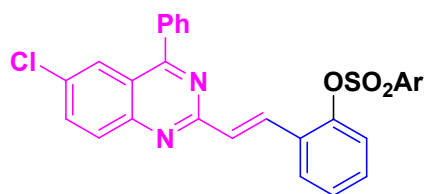

Ar = 4-NO<sub>2</sub>-C<sub>6</sub>H<sub>4</sub>; **3k** (84%); **5h**

**3-(2-(6-Chloro-4-phenylquinazolin-2-yl)vinyl)phenyl 4-nitrobenzenesulfonate (3l):**

Pale yellow solid, mp 201–203 °C, 85% yield. <sup>1</sup>H NMR (400 MHz, CDCl<sub>3</sub>) δ 8.22 (d, *J* = 15.9 Hz, 1H), 8.06–7.99 (m, 2H), 7.82 (s, 4H), 7.68 (d, *J* = 6.7 Hz, 2H), 7.63 (s, 4H), 7.46 (s, 2H), 7.38 (dd, *J* = 18.4, 6.8 Hz, 3H); <sup>13</sup>C NMR (100 MHz, CDCl<sub>3</sub>+DMSO-d<sub>6</sub>) δ 168.50, 154.58, 152.70, 149.83, 142.20, 138.93, 136.70, 134.88, 134.68, 133.14, 131.72, 130.67, 130.43, 130.38, 129.98, 128.93, 128.15, 127.61, 126.25, 125.75, 125.45, 121.31, 119.89, 118.11; HRMS (ESI, m/z): calcd. For C<sub>28</sub>H<sub>18</sub>ClN<sub>3</sub>O<sub>5</sub>SNH<sub>4</sub><sup>+</sup> 561.0994, found 561.0738.

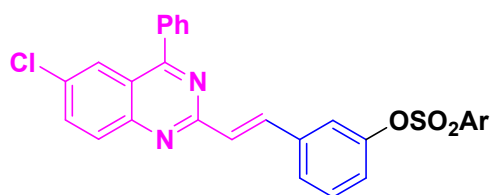

Ar = 4-NO<sub>2</sub>-C<sub>6</sub>H<sub>4</sub> ; **3l** (85%); 5.5h

**4-(2-(6-Chloro-4-phenylquinazolin-2-yl)vinyl)phenyl 4-nitrobenzenesulfonate (3m)**: Pale yellow solid, mp 218–219 °C, 81% yield. <sup>1</sup>H NMR (400 MHz, CDCl<sub>3</sub>) δ 8.04–7.95 (m, 3H), 7.80–7.73 (m, 5H), 7.61–7.55 (m, 4H), 7.48–7.45 (m, 3H), 7.24–7.18 (m, 2H), 6.90 (d, *J* = 8.0 Hz, 1H); <sup>13</sup>C NMR (100 MHz, CDCl<sub>3</sub>+DMSO-*d*<sub>6</sub>) δ 154.03, 151.78, 149.38, 148.75, 137.42, 134.47, 134.06, 133.66, 131.61, 131.02, 129.50, 129.09, 128.80, 128.25, 127.66, 127.44, 125.73, 122.96, 122.59, 121.59, 119.92, 114.54; HRMS (ESI, *m/z*): calcd. For C<sub>28</sub>H<sub>18</sub>ClN<sub>3</sub>O<sub>5</sub>SH<sup>+</sup> 544.0728, found 544.0746; IR (KBr thin film, cm<sup>-1</sup>): ν<sub>max</sub> 3395, 3098, 1650, 1557, 1536, 1364, 1202, 1090, 839.

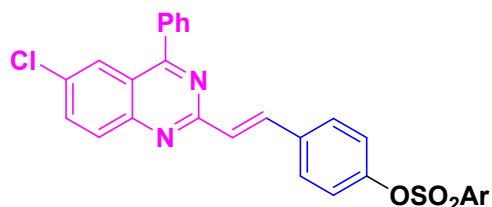

Ar = 4-NO<sub>2</sub>-C<sub>6</sub>H<sub>4</sub> ; **3m** (81%); 6h

**4-(2-(6-Chloro-4-phenylquinazolin-2-yl)vinyl)phenyl-4-nitro-3-(trifluoromethyl) benzene sulfonate (3n)**: Light brown solid, mp 175–176 °C, 80% yield. <sup>1</sup>H NMR (400 MHz, CDCl<sub>3</sub>+DMSO-*d*<sub>6</sub>) δ 8.57 (s, 2H), 8.30 – 8.17 (m, 7H), 8.09 (d, *J* = 9.3 Hz, 2H), 8.00 (s, 5H), 7.87 (s, 4H), 7.73 (d, *J* = 8.0 Hz, 2H), 7.69 (s, 7H), 7.63 (d, *J* = 16.0 Hz, 2H); <sup>13</sup>C NMR (100 MHz, DMSO-*d*<sub>6</sub>) δ 155.33, 153.06, 150.08, 149.44, 141.49, 141.30, 141.10, 132.10, 131.66, 129.64, 129.61, 129.26, 129.16, 128.92, 128.35, 127.52, 127.34, 125.29, 125.10, 123.84, 123.80, 123.62, 123.40, 117.87, 117.83; HRMS (ESI, *m/z*): calcd. For C<sub>29</sub>H<sub>17</sub>ClF<sub>3</sub>N<sub>3</sub>O<sub>5</sub>S 611.0530, found 610.1852; IR (KBr thin film, cm<sup>-1</sup>): ν<sub>max</sub> 3390, 2901, 1650, 1532, 1345, 1115, 1031, 865.

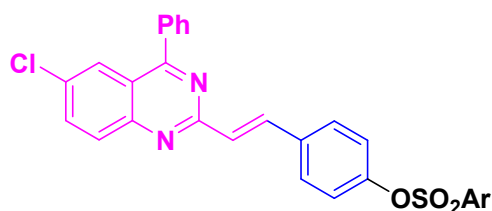

Ar = 4-NO<sub>2</sub>, 3-CF<sub>3</sub>-C<sub>6</sub>H<sub>3</sub> ; **3n** (80%); 5h

**2-(2-(6-Chloro-4-phenylquinazolin-2-yl)vinyl)-6-methoxyphenyl-4-nitrobenzenesulfonate (3o):**

Yellow solid, mp 184–185 °C, 82% yield. <sup>1</sup>H NMR (400 MHz, DMSO-d<sub>6</sub>) δ 8.37 (d, *J* = 7.6 Hz, 2H), δ 8.37 (d, *J* = 7.8 Hz, 2H), 8.07 – 8.00 (m, 3H), 7.94–7.89 (m, 2H), 7.81 – 7.75 (m, 3H), 7.58 (s, 3H), 7.35 (d, *J* = 16.0 Hz, 1H), 7.25– 7.13 (m, 3H), 3.54 (s, 3H); <sup>13</sup>C NMR (100 MHz, DMSO-d<sub>6</sub>) δ 167.34, 159.81, 152.71, 150.81, 150.05, 141.78, 136.88, 136.56, 135.36, 132.53, 131.33, 131.12, 130.95, 130.70, 130.32, 130.24, 129.30, 129.24, 129.01, 125.93, 125.03, 121.93, 119.19, 114.44, 56.39; HRMS (ESI, m/z): calcd. For C<sub>29</sub>H<sub>20</sub>ClN<sub>3</sub>O<sub>6</sub>SH<sup>+</sup> 574.0834, found 574.0863; IR (KBr thin film, cm<sup>-1</sup>): ν<sub>max</sub> 3396, 2989, 1649, 1566, 1346, 1279, 1148, 1066, 833.

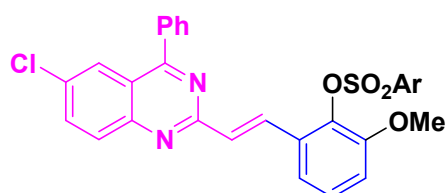

Ar = 4-NO<sub>2</sub>-C<sub>6</sub>H<sub>4</sub> ; 3o (82%); 6h

**5-(2-(6-Chloro-4-phenylquinazolin-2-yl)vinyl)-2-methoxyphenyl-4-nitrobenzenesulfonate (3p):**

Yellow solid, mp 190–191 °C, 80% yield. <sup>1</sup>H NMR (400 MHz, CDCl<sub>3</sub>) δ 8.39 (d, *J* = 8.0 Hz, 2H), 8.13 (d, *J* = 8.8 Hz, 3H), 8.05 – 8.00 (m, 2H), 7.83 (s, 3H), 7.64 (s, 3H), 7.39 (d, *J* = 16.0 Hz, 1H), 7.28 (s, 1H), 7.17 (s, 1H), 3.61 (s, 3H); <sup>13</sup>C NMR (100 MHz, DMSO-d<sub>6</sub>) δ 167.70, 160.39, 151.76, 151.42, 150.14, 140.90, 138.13, 137.62, 136.97, 136.72, 135.38, 132.30, 131.04, 130.77, 130.46, 130.27, 129.65, 129.23, 126.03, 125.11, 124.45, 122.12, 121.06, 112.87, 56.24; HRMS (ESI, m/z): calcd. For C<sub>29</sub>H<sub>20</sub>ClN<sub>3</sub>O<sub>6</sub>SH<sup>+</sup> 574.0834, found 574.0864; IR (KBr thin film, cm<sup>-1</sup>): ν<sub>max</sub> 3401, 2960, 1630, 1508, 1348, 1154, 1074, 846.

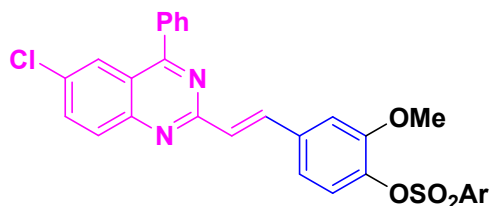

Ar = 4-NO<sub>2</sub>-C<sub>6</sub>H<sub>4</sub> ; 3p (80%); 6h

**5-(2-(6-Chloro-4-phenylquinazolin-2-yl)vinyl)-2-methoxyphenyl-4-nitro-3-**

**(trifluoromethyl) benzenesulfonate (3q):** Light brown solid, mp 185–186 °C, 83% yield. <sup>1</sup>H NMR (400 MHz, CDCl<sub>3</sub>) δ 8.37 (d, *J* = 8.4 Hz, 2H), 8.06 (d, *J* = 8.4 Hz, 2H), 8.01 (d, *J* = 16.0 Hz, 1H), 7.93 (dd, *J* = 8.4, 3.6 Hz, 2H), 7.81–7.74 (m, 3H), 7.57 (s, 3H), 7.37–7.12 (m, 3H), 3.53 (s, 3H); <sup>13</sup>C NMR (100 MHz, CDCl<sub>3</sub>+DMSO-d<sub>6</sub>) δ 166.24, 162.85, 159.61, 152.41,



149.11, 148.83, 137.93, 135.70, 135.53, 133.88, 133.68, 130.86, 130.72, 130.57, 130.43, 129.67, 129.43, 129.41, 129.38, 128.98, 128.95, 127.93, 127.89, 126.26, 124.75, 124.45, 104.35, 55.22; HRMS (ESI, m/z): calcd. For C<sub>30</sub>H<sub>19</sub>ClF<sub>3</sub>N<sub>3</sub>O<sub>6</sub>S 641.2635, found 641.2272.

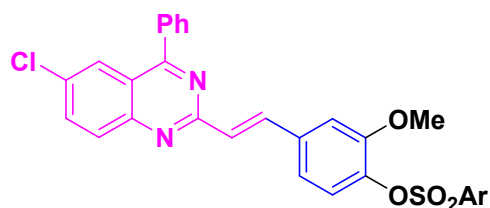

Ar = 4-NO<sub>2</sub>, 3-CF<sub>3</sub>-C<sub>6</sub>H<sub>3</sub>; **3q** (83%); **5h**

**(E)-4-(2-(4-Phenylquinazolin-2-yl)vinyl)phenyl benzenesulfonate (3r)**: pale yellow solid, mp 196–197 °C, 80% yield. <sup>1</sup>H NMR (400 MHz, CDCl<sub>3</sub>) δ 8.12 (d, *J* = 16.0 Hz, 1H), 8.02–7.97 (dd, *J* = 16.9, 5.2 Hz, 2H), 7.86–7.78 (m, 5H), 7.69–7.51 (m, 8H), 7.35 (d, *J* = 16.0 Hz, 1H), 7.02 (d, *J* = 8.4 Hz, 2H); <sup>13</sup>C NMR (100 MHz, CDCl<sub>3</sub>) δ 167.52, 160.41, 150.22, 149.81, 137.17, 136.83, 135.39, 135.32, 134.71, 134.33, 132.75, 130.37, 130.32, 129.88, 129.21, 128.89, 128.84, 128.53, 125.97, 122.77, 122.16. IR (KBr thin film, cm<sup>-1</sup>): ν<sub>max</sub> 2982, 1615, 1512, 1375, 1185, 1068.

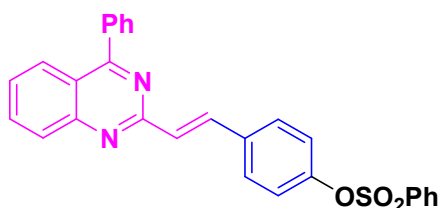

**3r** (80%); **6h**

**(E)-2-(2-(3-Hydroxyquinoxalin-2-yl)vinyl)phenyl methanesulfonate (5a)**: Yellow solid, mp 230–231 °C, 84% yield. <sup>1</sup>H NMR (400 MHz, DMSO-d<sub>6</sub>+CDCl<sub>3</sub>) δ 12.39 (s, 1H), 8.05 (d, *J* = 16.2 Hz, 1H), 7.70 (d, *J* = 7.4 Hz, 3H), 7.57 (d, *J* = 16.2 Hz, 1H), 7.37 (d, *J* = 7.3 Hz, 1H), 7.31 (d, *J* = 8.1 Hz, 2H), 7.28 – 7.16 (m, 2H), 3.24 (s, 3H); <sup>13</sup>C NMR (100MHz, CDCl<sub>3</sub>+ DMSO-d<sub>6</sub>) δ 168.98, 144.03, 142.60, 141.66, 139.56, 137.24, 135.89, 134.53, 133.16, 131.49, 128.53, 127.15, 125.68, 123.99, 122.33, 115.91, 38.53; HRMS (ESI, m/z): calcd. For C<sub>17</sub>H<sub>14</sub>N<sub>2</sub>O<sub>4</sub>SNa<sup>+</sup> 365.0566, found 365.0756; IR (KBr thin film, cm<sup>-1</sup>): ν<sub>max</sub> 3400, 2910, 283, 1640, 1574, 1366, 1151, 1067, 861.

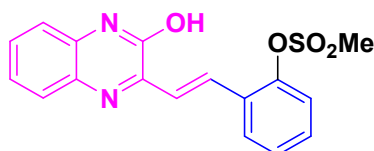

**5a** (84%); **5h**

**4-(2-(3-Hydroxyquinoxalin-2-yl)vinyl)phenyl methanesulfonate (5b)**: Pale red solid, mp 237–238 °C, 85% yield. <sup>1</sup>H NMR (400 MHz, CDCl<sub>3</sub>+ DMSO-d<sub>6</sub>) δ 12.23 (s, 1H), 8.01 (d, *J* =

16.0 Hz, 1H), 7.69 (d,  $J = 7.6$  Hz, 1H), 7.54 (d,  $J = 8.6$  Hz, 1H), 7.47 (d,  $J = 16.0$  Hz, 2H), 7.31 (d,  $J = 7.0$  Hz, 1H), 7.24 – 7.17 (m, 2H), 6.86 (d,  $J = 8.6$  Hz, 2H), 3.77 (s, 3H);  $^{13}\text{C}$  NMR (100 MHz,  $\text{CDCl}_3 + \text{DMSO-d}_6$ )  $\delta$  168.34, 148.65, 144.32, 138.86, 135.75, 134.21, 133.43, 131.71, 130.18, 128.72, 126.99, 126.00, 123.89, 113.10, 36.28; HRMS (ESI,  $m/z$ ): calcd. For  $\text{C}_{17}\text{H}_{14}\text{N}_2\text{O}_4\text{SNa}^+$  365.0566, found 365.0756; IR (KBr thin film,  $\text{cm}^{-1}$ ):  $\nu_{\text{max}}$  3400, 3017, 2966, 1651, 1525, 1415, 1336, 1148, 992, 839.

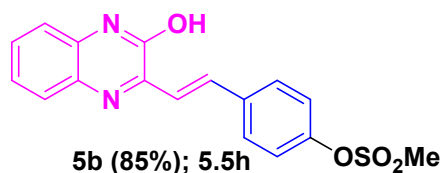

**2-(2-(3-Hydroxyquinoxalin-2-yl)vinyl)phenyl benzenesulfonate (5c):** Light green solid, mp 235–236 °C, 81% yield.  $^1\text{H}$  NMR (400 MHz,  $\text{DMSO-d}_6$ )  $\delta$  12.54 (s, 1H), 7.94 (d,  $J = 16.2$  Hz, 1H), 7.90 – 7.86 (m, 3H), 7.83 (dd,  $J = 8.0, 1.2$  Hz, 1H), 7.69–7.65 (m, 1H), 7.56 – 7.52 (m, 3H), 7.50 – 7.42 (m, 2H), 7.39 – 7.33 (m, 3H), 7.29 – 7.27 (m, 1H);  $^{13}\text{C}$  NMR (100 MHz,  $\text{CDCl}_3 + \text{DMSO-d}_6$ )  $\delta$  169.35, 158.32, 145.23, 138.19, 136.71, 136.30, 135.32, 134.44, 133.38, 132.39, 132.13, 129.50, 127.65, 127.30, 125.17, 124.22, 123.38, 121.11, 119.92, 118.67; HRMS (ESI,  $m/z$ ): calcd. For  $\text{C}_{22}\text{H}_{16}\text{N}_2\text{O}_4\text{SH}^+$  405.0904, found 405.0913; IR (KBr thin film,  $\text{cm}^{-1}$ ):  $\nu_{\text{max}}$  3403, 2926, 2886, 1625, 1558, 1372, 1192, 1081, 880, 771.

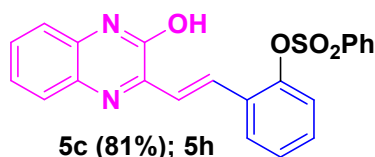

**3-(2-(3-Hydroxyquinoxalin-2-yl)vinyl)phenyl benzenesulfonate (5d):** Pale yellow solid, mp 221–222 °C, 84% yield.  $^1\text{H}$  NMR (400 MHz,  $\text{CDCl}_3 + \text{DMSO-d}_6$ )  $\delta$  12.31 (s, 1H), 9.58 (s, 1H), 8.04 – 7.88 (m, 2H), 7.71 (d,  $J = 6.9$  Hz, 2H), 7.48 (d,  $J = 5.3$  Hz, 3H), 7.42 (s, 1H), 7.37 (s, 1H), 7.33 – 7.16 (m, 3H), 6.81 (d,  $J = 4.6$  Hz, 2H);  $^{13}\text{C}$  NMR (100 MHz,  $\text{CDCl}_3 + \text{DMSO-d}_6$ )  $\delta$  156.18, 153.72, 148.52, 135.85, 135.79, 133.79, 133.09, 131.38, 131.25, 131.13, 130.60, 130.56, 129.89, 129.61, 128.97, 128.19, 125.27, 124.75, 124.69, 116.71; HRMS (ESI,  $m/z$ ): calcd. For  $\text{C}_{22}\text{H}_{16}\text{N}_2\text{O}_4\text{SH}^+$  405.0904, found 405.0920; IR (KBr thin film,  $\text{cm}^{-1}$ ):  $\nu_{\text{max}}$  3400, 2980, 1644, 1536, 1355, 1185, 958, 810, 762.

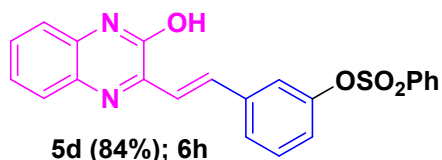

**4-(2-(3-Hydroxyquinoxalin-2-yl)vinyl)phenyl benzenesulfonate (5e):** Yellow solid, mp 202–203 °C, 85% yield. <sup>1</sup>H NMR (400 MHz, CDCl<sub>3</sub>) δ 11.99 (s, 1H), 8.04 (d, *J* = 16.4 Hz, 1H), 7.80 (d, *J* = 7.6 Hz, 3H), 7.64–7.60 (m, 1H), 7.59–7.52 (m, 2H), 7.51–7.40 (m, 3H), 7.30–7.27 (m, 2H), 7.19 (s, 1H), 6.96 (d, *J* = 8.4 Hz, 2H); <sup>13</sup>C NMR (100 MHz, CDCl<sub>3</sub>+DMSO-*d*<sub>6</sub>) δ 168.64, 150.50, 143.64, 139.53, 137.22, 135.86, 134.52, 133.16, 132.15, 130.13, 129.05, 127.06, 125.71, 124.68, 124.00, 122.62, 121.00, 117.96; HRMS (ESI, *m/z*): calcd. For C<sub>22</sub>H<sub>16</sub>N<sub>2</sub>O<sub>4</sub>SH<sup>+</sup> 405.0904, found 405.0921.

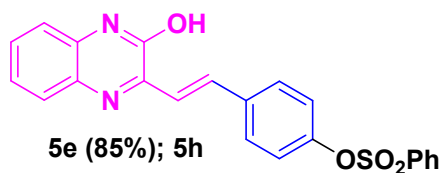

**2-(2-(3-Hydroxyquinoxalin-2-yl)vinyl)phenyl 4-methylbenzenesulfonate (5f):** Pale yellow powder, mp 224–225 °C, 81% yield. <sup>1</sup>H NMR (400 MHz, CDCl<sub>3</sub>+DMSO-*d*<sub>6</sub>) δ 12.30 (s, 1H), 7.85 (d, *J* = 16.0 Hz, 1H), 7.76 (d, *J* = 8.0 Hz, 1H), 7.69–7.62 (m, 4H), 7.45–7.42 (m, 1H), 7.37–7.28 (m, 5H), 7.11 (d, *J* = 8.0 Hz, 2H), 2.16 (s, 3H); <sup>13</sup>C NMR (100 MHz, CDCl<sub>3</sub>+DMSO-*d*<sub>6</sub>) δ 160.64, 154.42, 144.41, 141.13, 139.69, 138.66, 137.16, 135.98, 134.75, 134.05, 133.50, 132.96, 131.97, 130.41, 129.39, 127.81, 127.50, 126.56, 126.01, 119.71, 21.54; HRMS (ESI, *m/z*): calcd. For C<sub>23</sub>H<sub>18</sub>N<sub>2</sub>O<sub>4</sub>SH<sup>+</sup> 419.1060, found 419.1082; IR (KBr thin film, cm<sup>-1</sup>): ν<sub>max</sub> 3395, 2986, 2877, 1665, 1527, 1353, 1374, 1196, 1083, 880.

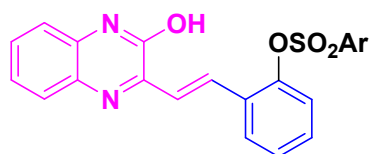

**4-(2-(3-Hydroxyquinoxalin-2-yl)vinyl)phenyl-4-methylbenzenesulfonate (5g):** Yellow solid, mp 229–230 °C, 84% yield. <sup>1</sup>H NMR (400 MHz, DMSO-*d*<sub>6</sub>+CDCl<sub>3</sub>) δ 12.32 (s, 1H), 7.99 (d, *J* = 16.1 Hz, 1H), 7.69 (d, *J* = 6.2 Hz, 1H), 7.63 (d, *J* = 5.2 Hz, 2H), 7.53 (d, *J* = 9.2 Hz, 3H), 7.34 (d, *J* = 12.2 Hz, 3H), 7.29–7.15 (m, 3H), 6.93 (d, *J* = 5.3 Hz, 2H), 2.40 (s, 3H); <sup>13</sup>C NMR (100 MHz, CDCl<sub>3</sub>+DMSO-*d*<sub>6</sub>) δ 155.29, 153.08, 149.77, 145.92, 135.77, 135.65, 132.85, 132.09, 132.00, 130.31, 129.99, 129.15, 128.75, 128.53, 123.67, 123.44, 122.89, 115.67, 21.72;

HRMS (ESI, m/z): calcd. For  $C_{23}H_{18}N_2O_4SH^+$  418.0987, found 419.1079; IR (KBr thin film,  $cm^{-1}$ ):  $\nu_{max}$  3396, 2932, 2893, 1666, 1590, 1430, 1372, 1176, 1091, 828.

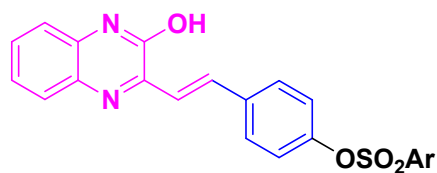

Ar = 4-Me-C<sub>6</sub>H<sub>4</sub>; **5g** (84%); **6h**

**2-(2-(3-Hydroxyquinoxalin-2-yl)vinyl)-6-methoxyphenyl methanesulfonate (5h)**; White solid, mp 243–244 °C, 80% yield. <sup>1</sup>H NMR (400 MHz, CDCl<sub>3</sub>+DMSO-d<sub>6</sub>)  $\delta$  12.50 (s, 1H), 8.35 (d,  $J$  = 16.0 Hz, 1H), 7.76 (d,  $J$  = 8.0 Hz, 1H), 7.64 (d,  $J$  = 16.4 Hz, 1H), 7.512–7.455 (m, 2H), 7.39–7.26 (m, 3H), 7.17 (d,  $J$  = 8.0 Hz, 1H), 3.91 (s, 3H), 3.49 (s, 3H); <sup>13</sup>C NMR (100 MHz, CDCl<sub>3</sub>)  $\delta$  168.44, 162.05, 151.23, 150.19, 139.89, 137.99, 135.60, 133.25, 131.22, 130.89, 130.24, 129.81, 126.70, 123.00, 112.10, 110.3, 56.87, 30.73; HRMS (ESI, m/z): calcd. For  $C_{18}H_{16}N_2O_5SH^+$  373.0853, found 373.0870; IR (KBr thin film,  $cm^{-1}$ ):  $\nu_{max}$  3400, 2910, 283, 1640, 1574, 1366, 1151, 1067, 861.

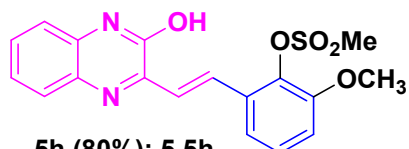

**5h** (80%); **5.5h**

**5-(2-(3-Hydroxyquinoxalin-2-yl)vinyl)-2-methoxyphenyl methane sulfonate (5i)**; Yellow crystalline solid, mp 207–208 °C, 82% yield. <sup>1</sup>H NMR (400 MHz, CDCl<sub>3</sub>+ DMSO-d<sub>6</sub>)  $\delta$  12.27 (s, 1H), 8.04 (d,  $J$  = 16.0 Hz, 1H), 7.74 (d,  $J$  = 8.0 Hz, 1H), 7.64 (d,  $J$  = 8.0 Hz, 2H), 7.56–7.44 (m, 1H), 7.37–7.33 (m, 1H), 7.24–7.23 (m, 1H), 7.10–7.06 (m, 2H), 3.52 (s, 3H), 2.38 (s, 3H); <sup>13</sup>C NMR (100 MHz, CDCl<sub>3</sub>+ DMSO-d<sub>6</sub>)  $\delta$  161.41, 158.70, 157.57, 151.10, 144.39, 142.42, 138.52, 137.48, 135.56, 135.20, 134.34, 129.45, 128.90, 126.35, 121.35, 116.76, 61.32, 27.41; HRMS (ESI, m/z): calcd. For  $C_{18}H_{16}N_2O_5SNa^+$  395.0672, found 395.0689; IR (KBr thin film,  $cm^{-1}$ ):  $\nu_{max}$  3401, 2935, 2884, 1655, 1587, 1415, 1347, 1154, 1090, 843.

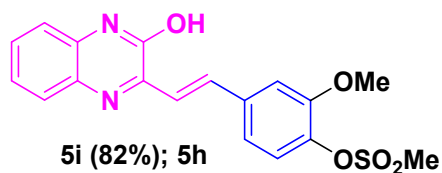

**5i** (82%); **5h**

**2-(2-(3-Hydroxyquinoxalin-2-yl)vinyl)-6-methoxyphenyl benzenesulfonate (5j)**; Pale green solid, mp 223–224 °C, 80% yield. <sup>1</sup>H NMR (400 MHz, CDCl<sub>3</sub>+DMSO-d<sub>6</sub>)  $\delta$  8.13–8.03 (m, 2H), 8.01–7.82 (m, 2H), 7.84–7.82 (m, 2H), 7.67–7.62 (m, 4H), 7.56 (s, 1H), 7.52 (s, 1H), 7.39–7.31 (m, 2H), 3.97 (s, 3H); <sup>13</sup>C NMR (100 MHz, CDCl<sub>3</sub>+ DMSO-d<sub>6</sub>)  $\delta$  159.95, 157.57, 142.05,

141.40, 138.97, 137.49, 136.89, 136.71, 134.96, 134.82, 134.06, 133.71, 133.09, 132.85, 129.08, 128.42, 123.05, 120.43, 118.21, 60.70; HRMS (ESI, m/z): calcd. For  $C_{23}H_{18}N_2O_5SH^+$  435.1009, found 435.1017; IR (KBr thin film,  $cm^{-1}$ ):  $\nu_{max}$  3398, 1666, 1576, 1449, 1376, 1205, 1084, 766.

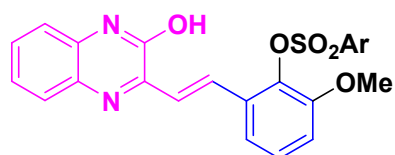

Ar = Ph; **5j** (80%); **5h**

**2-(2-(3-Hydroxyquinoxalin-2-yl)vinyl)-6-methoxyphenyl 4-methylbenzenesulfonate (5k):**

Light brown solid, mp 222–223 °C, 75% yield.  $^1H$  NMR (400 MHz,  $CDCl_3+DMSO-d_6$ )  $\delta$  12.39 (s, 1H), 7.84 (d,  $J = 16.2$  Hz, 1H), 7.72 (t,  $J = 8.8$  Hz, 3H), 7.46 (dd,  $J = 15.3, 9.7$  Hz, 2H), 7.36 (d,  $J = 8.3$  Hz, 1H), 7.34 – 7.26 (m, 3H), 7.22 (d,  $J = 8.1$  Hz, 2H), 7.03 (d,  $J = 7.6$  Hz, 1H), 3.72 (s, 3H), 2.12 (s, 3H);  $^{13}C$  NMR (100 MHz,  $CDCl_3+DMSO-d_6$ )  $\delta$  159.88, 157.83, 157.51, 149.94, 142.16, 138.41, 137.46, 136.85, 136.54, 135.02, 134.81, 134.57, 133.66, 133.12, 132.76, 128.74, 128.43, 123.05, 120.40, 118.29, 60.84, 26.06; HRMS (ESI, m/z): calcd. For  $C_{24}H_{20}N_2O_5SH^+$  449.1166, found 449.1187; IR (KBr thin film,  $cm^{-1}$ ):  $\nu_{max}$  3389, 2835, 1650, 1573, 1354, 1083, 811.

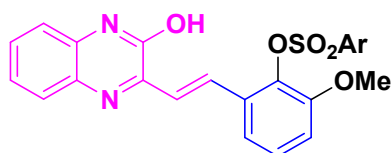

Ar = 4-Me- $C_6H_4$ ; **5k** (75%); **6h**

**5-(2-(3-Hydroxyquinoxalin-2-yl)vinyl)-2-methoxyphenyl benzenesulfonate (5l):**

Yellow solid, mp 197–198 °C, 78 % yield.  $^1H$  NMR (400 MHz,  $DMSO-d_6+CDCl_3$ )  $\delta$  12.27 (s, 1H), 7.91 – 7.78 (m, 3H), 7.69 – 7.63 (m, 1H), 7.49 (d,  $J = 16.1$  Hz, 1H), 7.40 (s, 4H), 7.31 (d,  $J = 6.7$  Hz, 1H), 7.27 – 7.17 (m, 3H), 6.90 (d,  $J = 7.2$  Hz, 1H), 3.59 (s, 3H);  $^{13}C$  NMR (100 MHz,  $CDCl_3+DMSO-d_6$ )  $\delta$  157.95, 155.57, 140.05, 139.40, 136.97, 135.49, 134.89, 134.71, 132.96, 132.82, 132.06, 131.71, 131.09, 130.85, 127.08, 126.42, 121.05, 118.43, 116.21, 58.70; HRMS (ESI, m/z): calcd. For  $C_{23}H_{18}N_2O_5SH^+$  435.1009, found 435.1026; IR (KBr thin film,  $cm^{-1}$ ):  $\nu_{max}$  3410, 2928, 2845, 1659, 1504, 1355, 1114, 1030, 839.

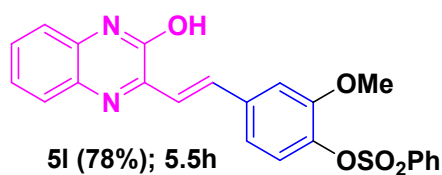

**5l** (78%); **5.5h**

**2-(2-(3-Hydroxyquinoxalin-2-yl)vinyl)phenyl-4-nitrobenzenesulfonate (5m):** Pale yellow solid, mp 238–239 °C, 85% yield. <sup>1</sup>H NMR (400 MHz, CDCl<sub>3</sub>+DMSO-d<sub>6</sub>) δ 12.53 (s, 1H), 8.22 (d, *J* = 8.4 Hz, 2H), 8.08 (d, *J* = 8.4 Hz, 2H), 7.86–7.78 (m, 2H), 7.66 (d, *J* = 16.4 Hz, 1H), 7.59–7.43 (m, 3H), 7.42–7.23 (m, 4H); <sup>13</sup>C NMR (100 MHz, CDCl<sub>3</sub>+DMSO-d<sub>6</sub>) δ 157.74, 155.10, 153.82, 149.96, 142.83, 135.43, 134.88, 133.47, 133.34, 133.17, 132.88, 131.89, 131.66, 131.28, 130.65, 130.42, 127.63, 126.82, 126.57, 118.50; HRMS (ESI, *m/z*): calcd. For Calculated Formula: C<sub>22</sub>H<sub>15</sub>N<sub>3</sub>O<sub>6</sub>SH<sup>+</sup> 450.0754, found 450.0769; IR (KBr thin film, cm<sup>-1</sup>): ν<sub>max</sub> 3395, 2950, 2840, 1160, 1531, 1356, 1189, 1074, 821.

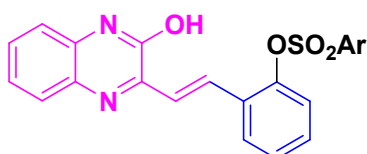

Ar = 4-NO<sub>2</sub>-C<sub>6</sub>H<sub>4</sub>; 5m (85%); 5h

**4-(2-(3-Hydroxyquinoxalin-2-yl)vinyl)phenyl-4-nitrobenzenesulfonate (5n):** Yellow solid, mp 233–234 °C, 84% yield. <sup>1</sup>H NMR (400 MHz, CDCl<sub>3</sub>+DMSO-d<sub>6</sub>) δ 8.45–8.41 (m, 2H), 8.13–8.09 (m, 2H), 8.04–7.98 (m, 1H), 7.72 (dd, *J* = 7.6, 1.0 Hz, 1H), 7.64 (d, *J* = 8.4 Hz, 2H), 7.56 (d, *J* = 16.4 Hz, 1H), 7.43–7.38 (m, 1H), 7.29–7.22 (m, 2H), 7.05 (d, *J* = 8.4 Hz, 2H); <sup>13</sup>C NMR (100 MHz, CDCl<sub>3</sub>+DMSO-d<sub>6</sub>) δ 160.08, 157.71, 155.98, 154.05, 145.09, 140.91, 140.28, 137.60, 136.80, 135.06, 134.75, 134.05, 133.50, 129.70, 128.49, 128.41, 127.50, 120.41; HRMS (ESI, *m/z*): calcd. For C<sub>22</sub>H<sub>15</sub>N<sub>3</sub>O<sub>6</sub>SH<sup>+</sup> 450.0754, found 450.0756; IR (KBr thin film, cm<sup>-1</sup>): ν<sub>max</sub> 3396, 2886, 1664, 1532, 1405, 1360, 1149, 977, 855.

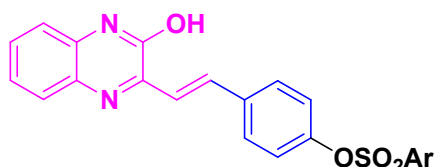

Ar = 4-NO<sub>2</sub>-C<sub>6</sub>H<sub>4</sub>; 5n (84%); 5h

**2-(2-(3-Hydroxyquinoxalin-2-yl)vinyl)-6-methoxyphenyl 4-nitrobenzenesulfonate (5o):** Yellow solid, mp 229–230 °C, 82% yield. <sup>1</sup>H NMR (400 MHz, DMSO-d<sub>6</sub>+CDCl<sub>3</sub>) δ 12.49 (s, 1H), 8.33 (d, *J* = 7.8 Hz, 2H), 8.20 (t, *J* = 14.6 Hz, 2H), 7.77 (d, *J* = 16.0 Hz, 1H), 7.67 (d, *J* = 7.2 Hz, 1H), 7.51–7.28 (m, 6H), 7.18 (d, *J* = 8.0 Hz, 1H), 3.72 (s, 3H); <sup>13</sup>C NMR (100 MHz, CDCl<sub>3</sub>+DMSO-d<sub>6</sub>) δ 159.72, 157.56, 157.29, 155.62, 146.63, 141.89, 137.28, 136.97, 136.21, 135.27, 134.97, 134.36, 133.61, 133.56, 129.69, 129.63, 128.64, 123.39, 120.50, 118.89, 61.07; HRMS (ESI, *m/z*): calcd. For C<sub>23</sub>H<sub>17</sub>N<sub>3</sub>O<sub>7</sub>SH<sup>+</sup> 480.0860, found 480.0880; IR (KBr thin film, cm<sup>-1</sup>): ν<sub>max</sub> 3390, 3102, 2892, 1666, 1573, 1347, 1140, 1063, 887, 754.

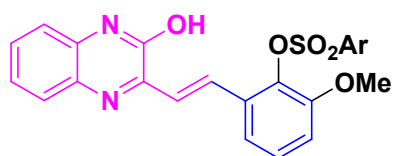

Ar = 4-NO<sub>2</sub>-C<sub>6</sub>H<sub>4</sub>; **5o** (82%); **6h**

**5-(2-(3-Hydroxyquinoxalin-2-yl)vinyl)-2-methoxyphenyl-4-nitrobenzenesulfonat (5p):**

White solid, mp 218–219 °C, 78% yield. <sup>1</sup>H NMR (400 MHz, CDCl<sub>3</sub>+DMSO-d<sub>6</sub>) δ 12.33 (s, 1H), 8.35 (d, *J* = 8.8 Hz, 2H), 8.05 (d, *J* = 8.8 Hz, 2H), 8.00 (d, *J* = 16.2 Hz, 1H), 7.73 (s, 1H), 7.69 (d, *J* = 7.9 Hz, 1H), 7.53 (d, *J* = 16.2 Hz, 1H), 7.39 – 7.32 (m, 1H), 7.28 – 7.18 (m, 2H), 7.17 – 7.13 (m, 2H), 3.53 (s, 3H); <sup>13</sup>C NMR (100 MHz, CDCl<sub>3</sub>+DMSO-d<sub>6</sub>) δ 155.86, 153.71, 153.57, 153.44, 151.79, 142.73, 138.02, 133.41, 133.12, 132.32, 131.48, 131.13, 130.50, 129.77, 125.89, 125.79, 124.84, 119.56, 116.66, 115.12, 57.25; HRMS (ESI, *m/z*): calcd. For C<sub>23</sub>H<sub>17</sub>N<sub>3</sub>O<sub>7</sub>SH<sup>+</sup> 480.0860, found 480.0866; IR (KBr thin film, cm<sup>-1</sup>): ν<sub>max</sub> 3405, 2976, 2844, 1661, 1532, 1347, 1115, 851.

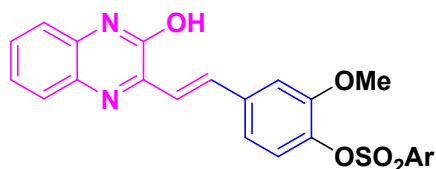

Ar = 4-NO<sub>2</sub>-C<sub>6</sub>H<sub>4</sub>; **5p** (78%); **5.5h**

### 3. <sup>1</sup>H & <sup>13</sup>C-NMR and Mass spectra of products (3a -3r and 5a – 5p).

#### 2-(2-(6-Chloro-4-phenylquinazolin-2-yl)vinyl)phenyl methanesulfonate (3a):

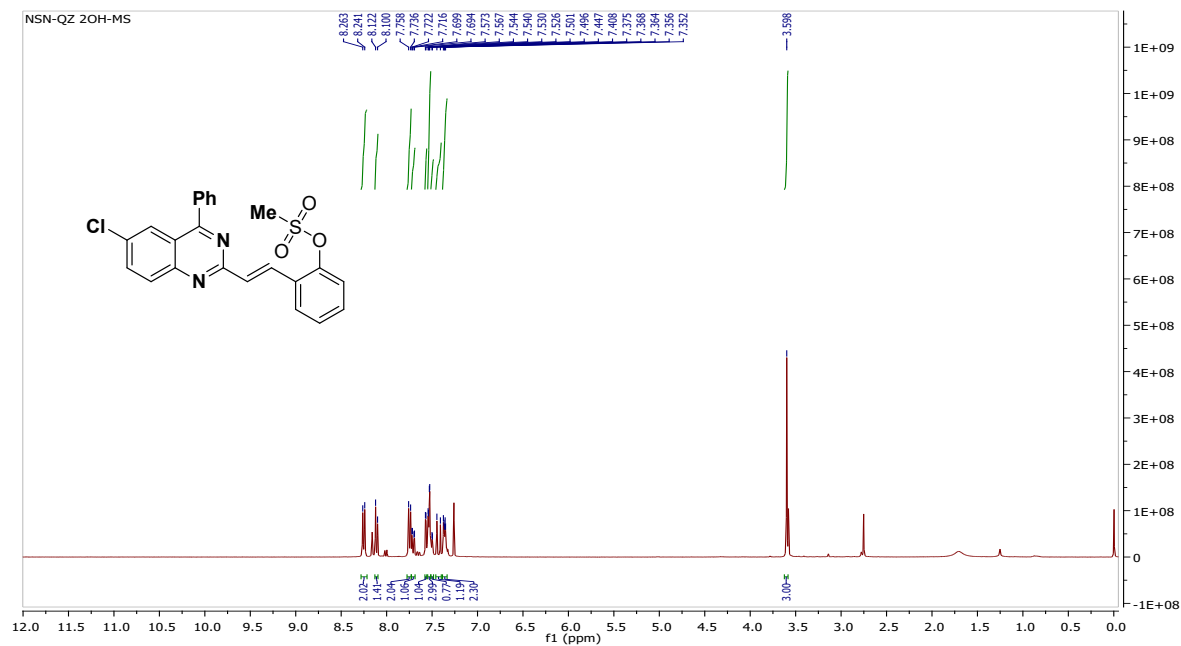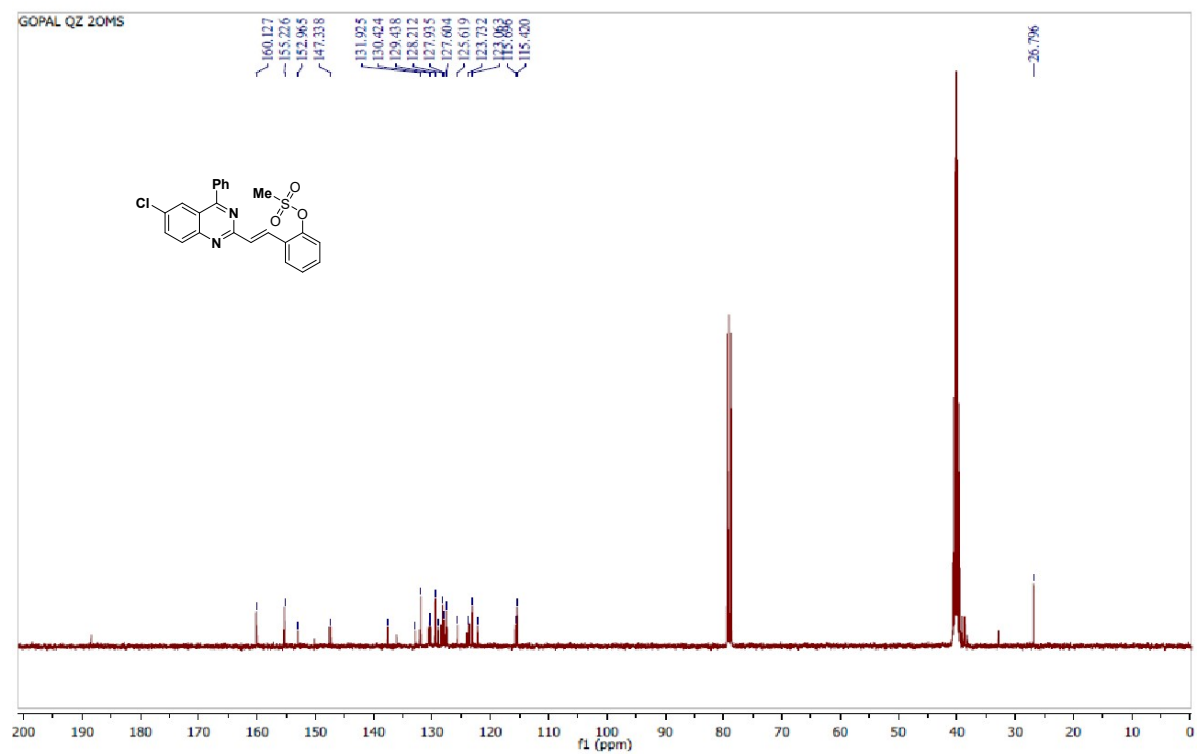



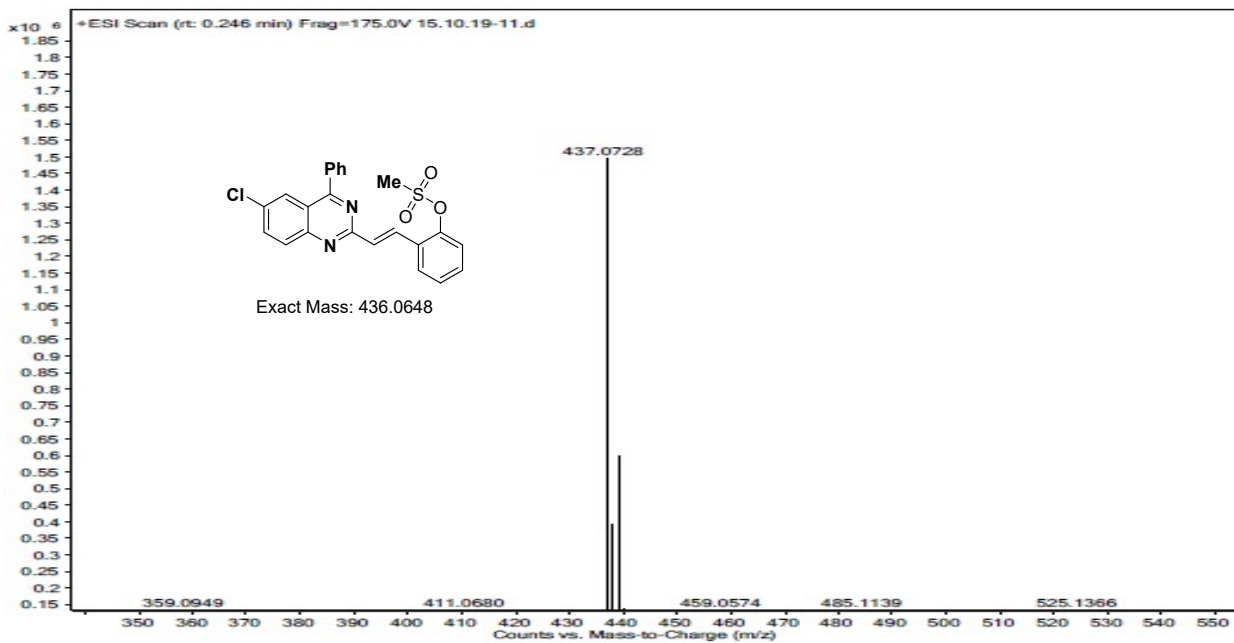

**5-(2-(6-Chloro-4-phenylquinazolin-2-yl)vinyl)-2-methoxyphenyl 4-methylbenzene sulfonate (3b):**

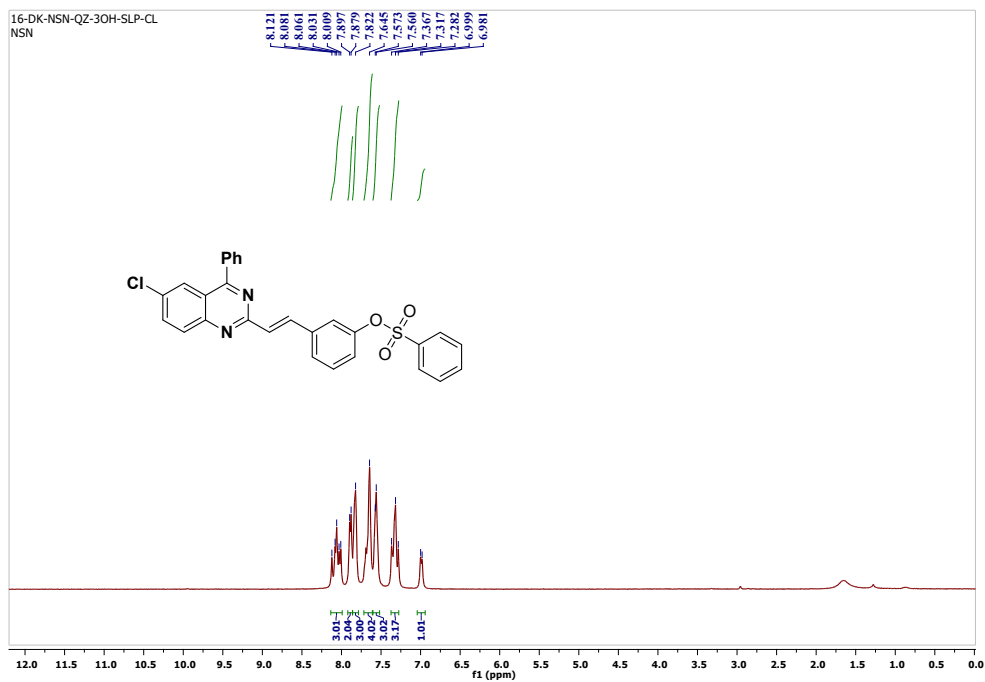

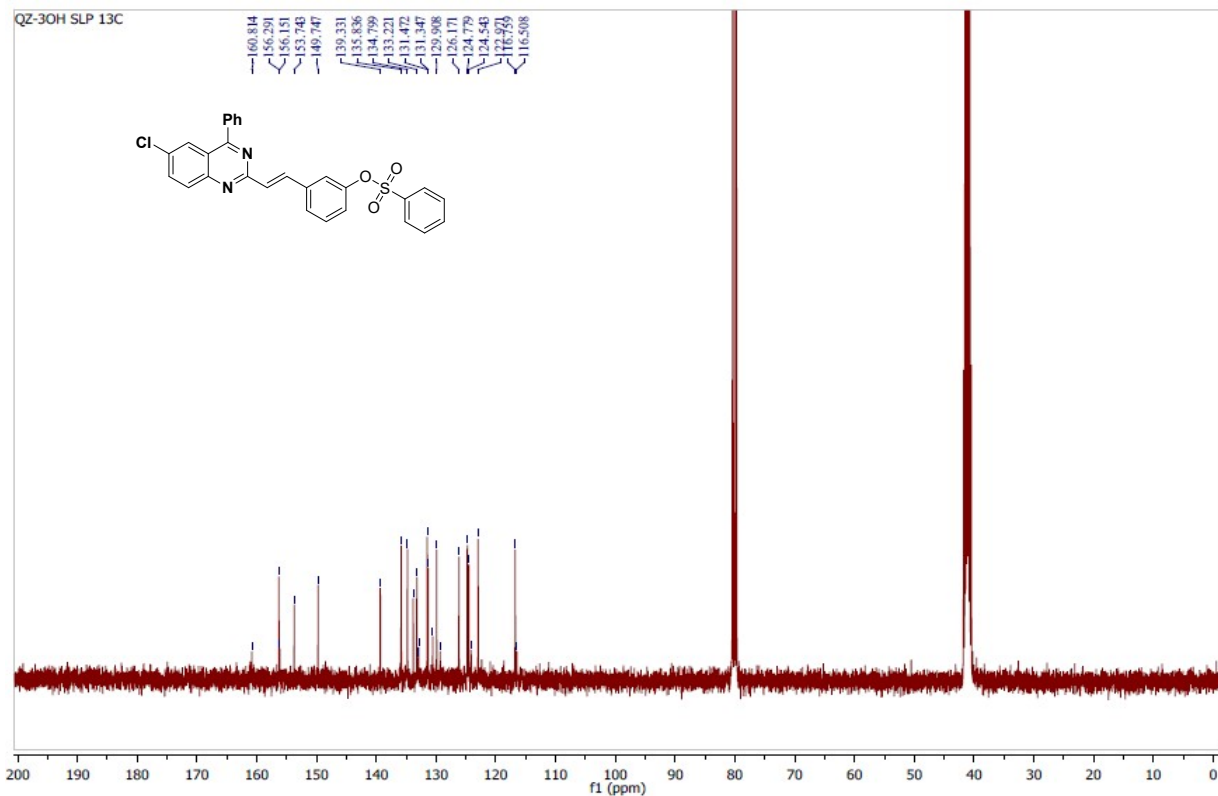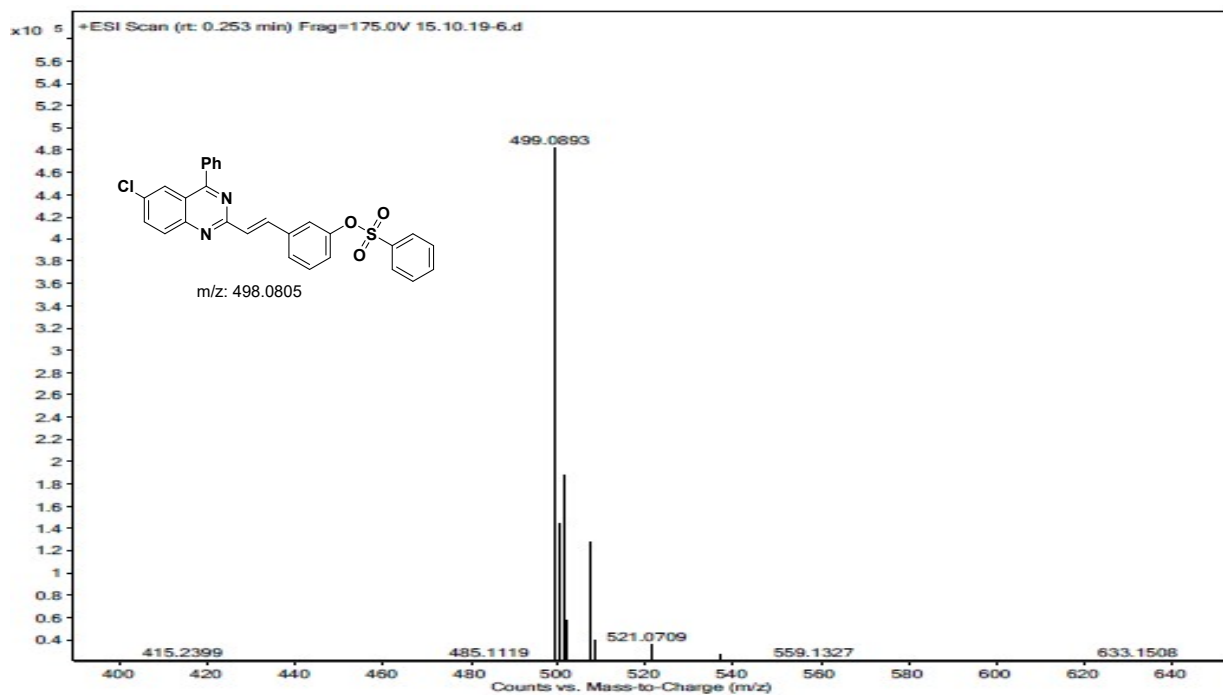

**4-(2-(3-Hydroxyquinoxalin-2-yl)vinyl)phenyl benzenesulfonate (3c):**

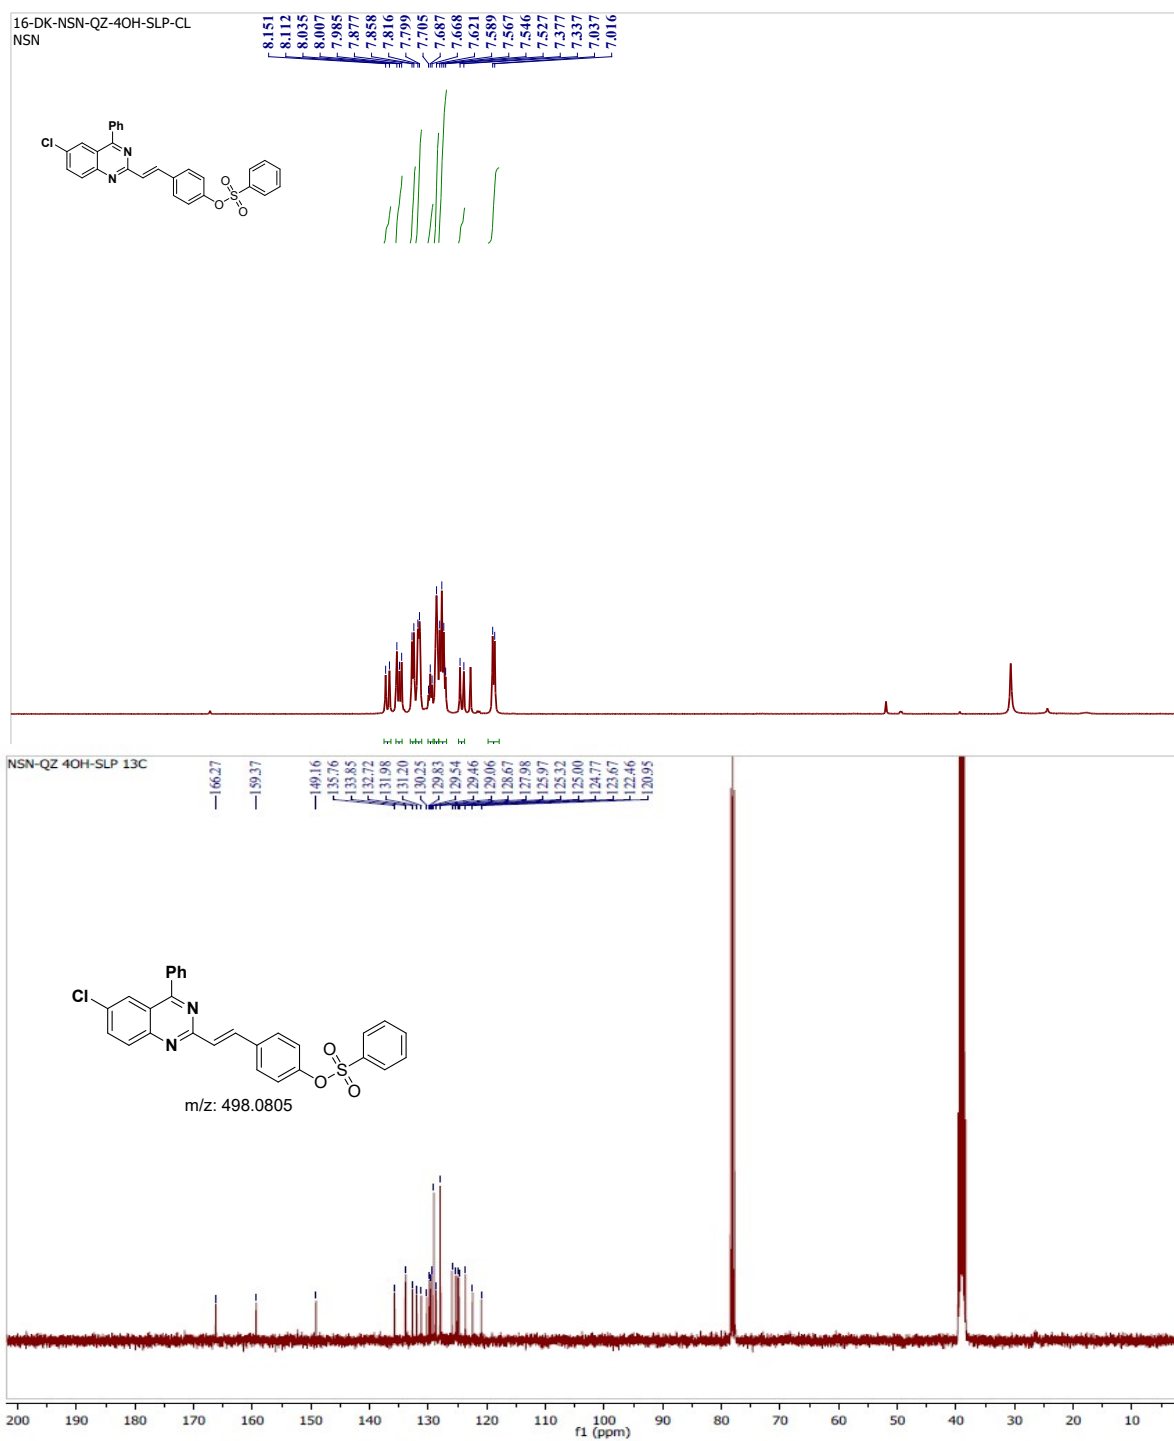

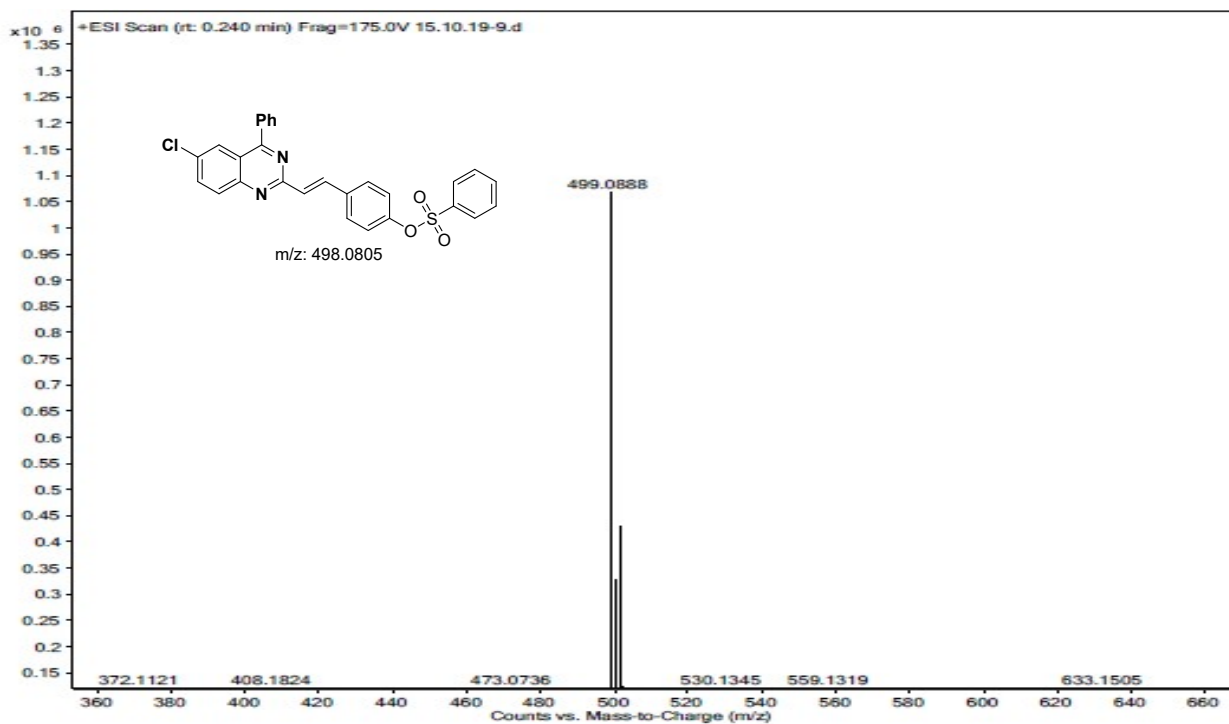

**4-(2-(6-Chloro-4-phenylquinazolin-2-yl)vinyl)phenyl methanesulfonate (3d):**

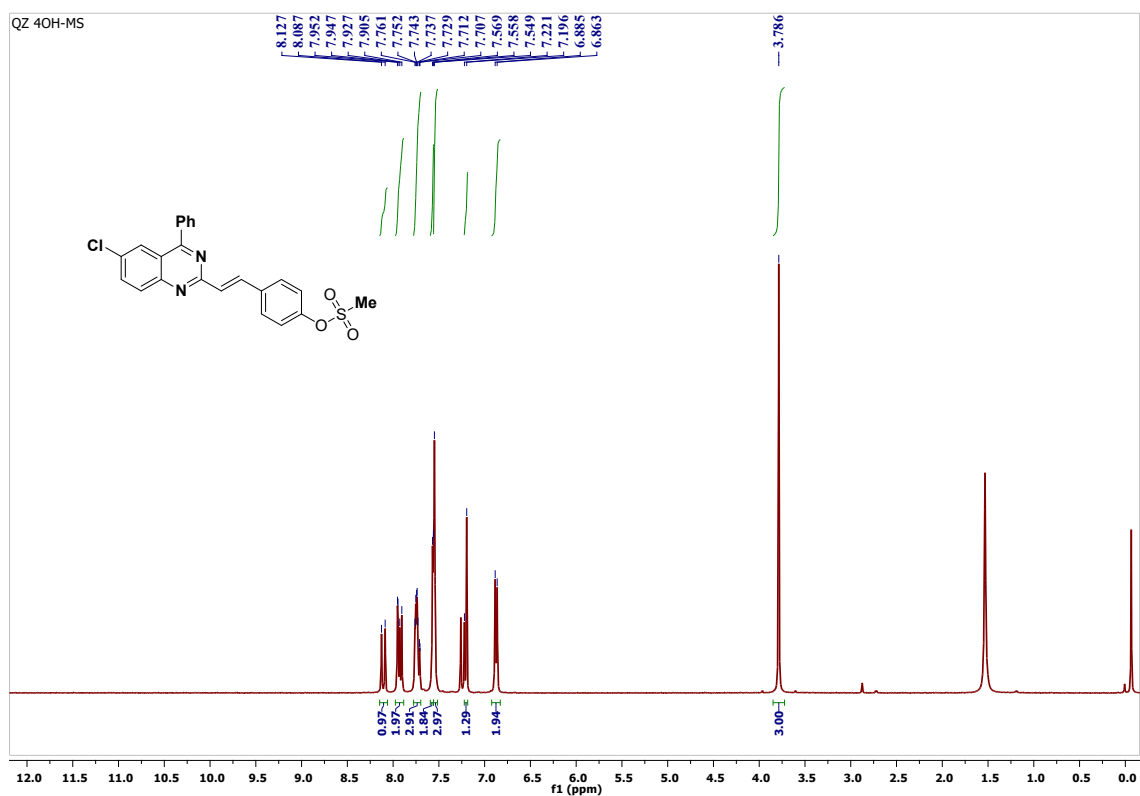

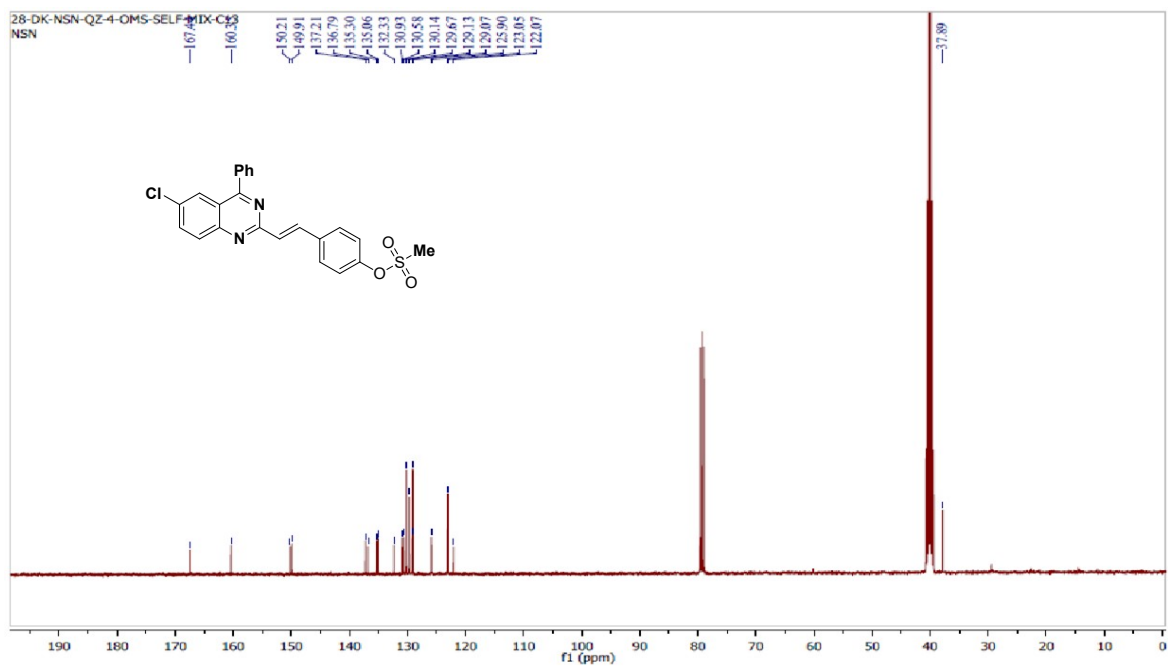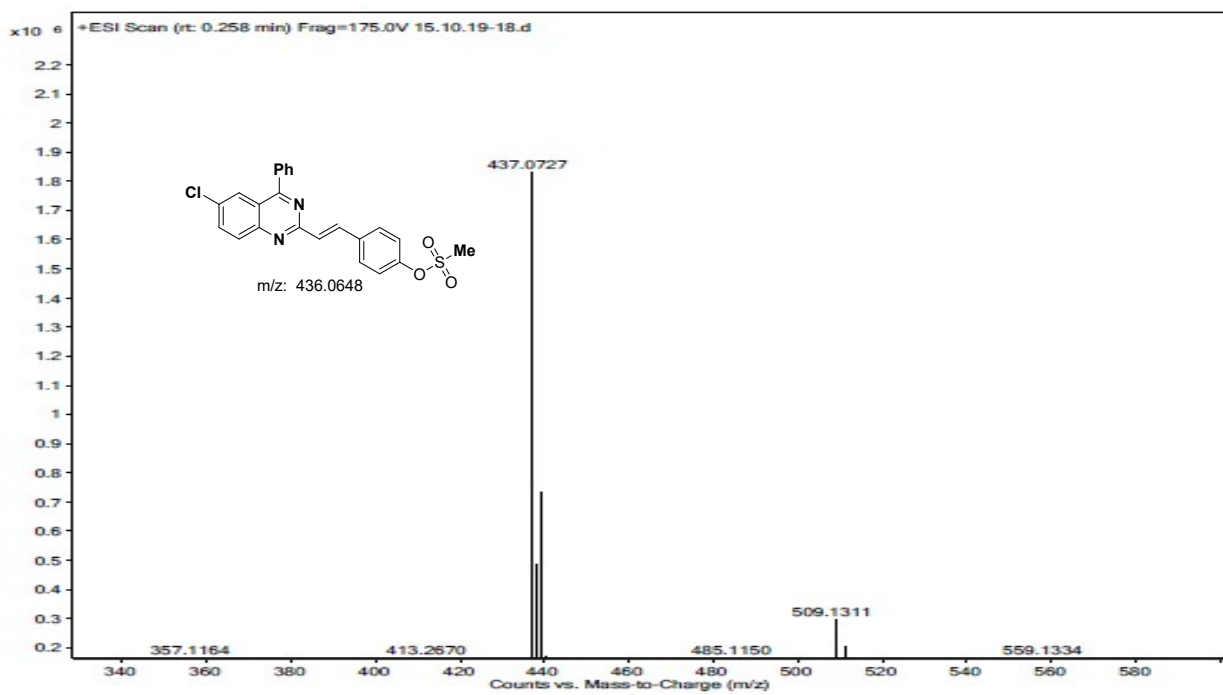

**2-(2-(6-Chloro-4-phenylquinazolin-2-yl)vinyl)phenyl-4-methylbenzenesulfonate (3e):**

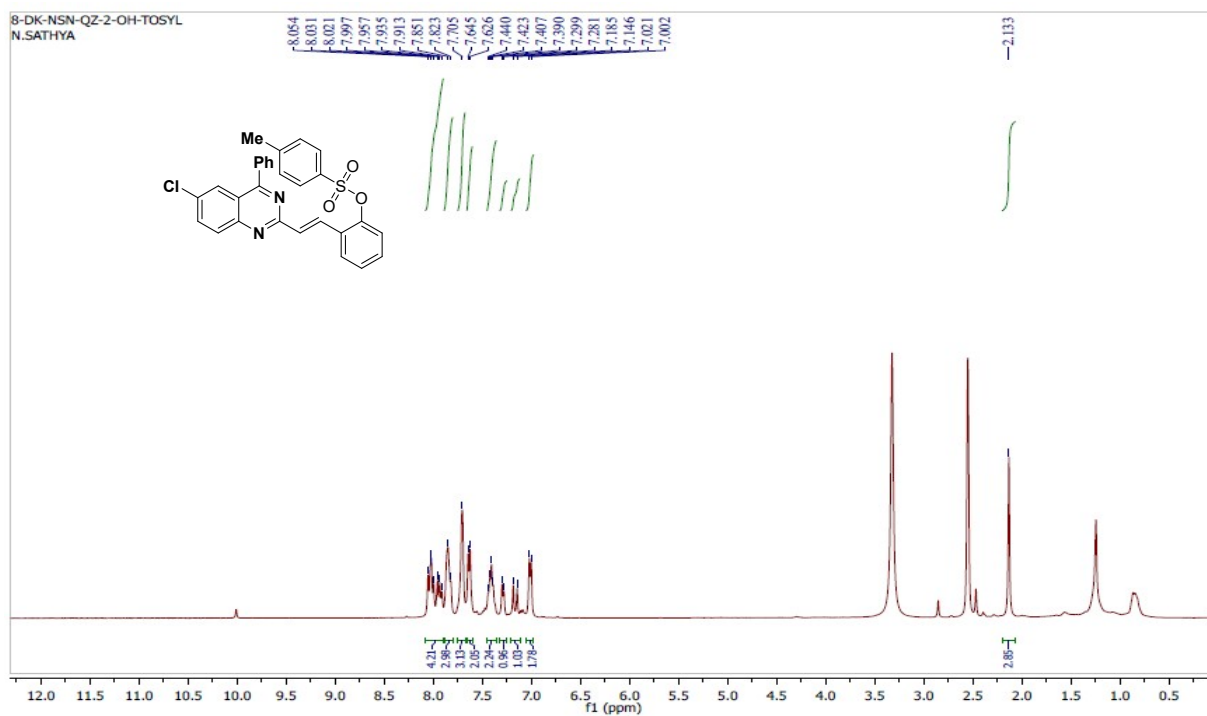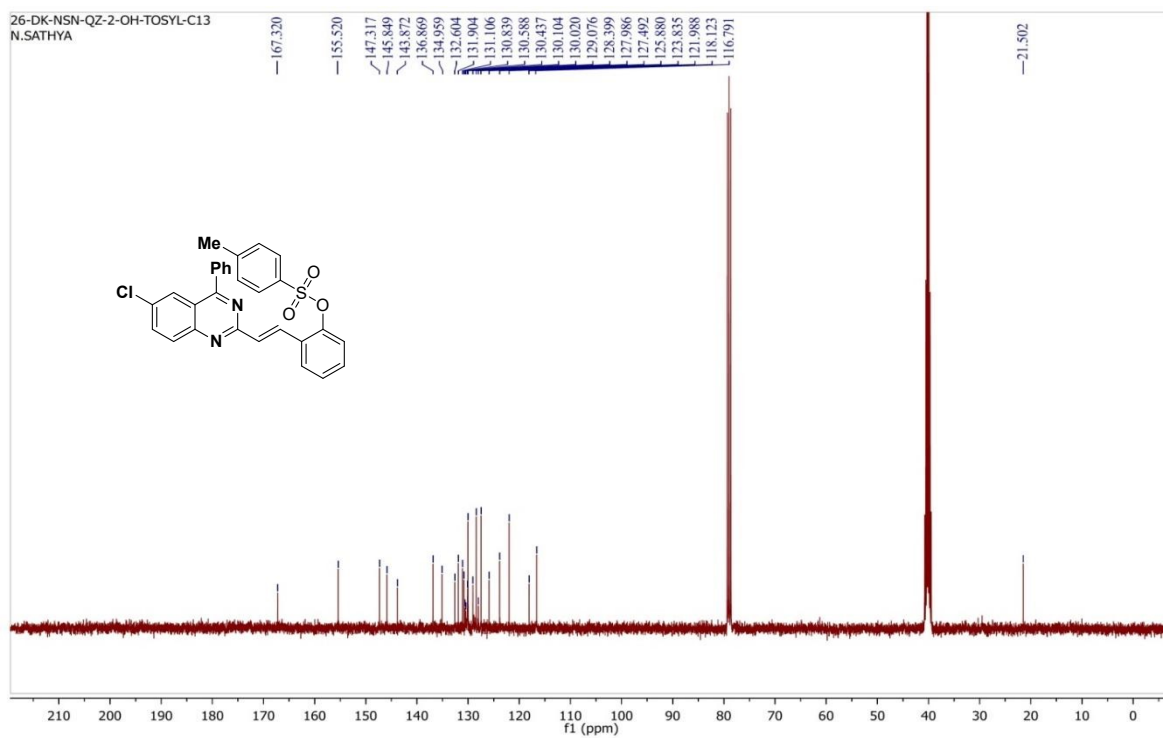

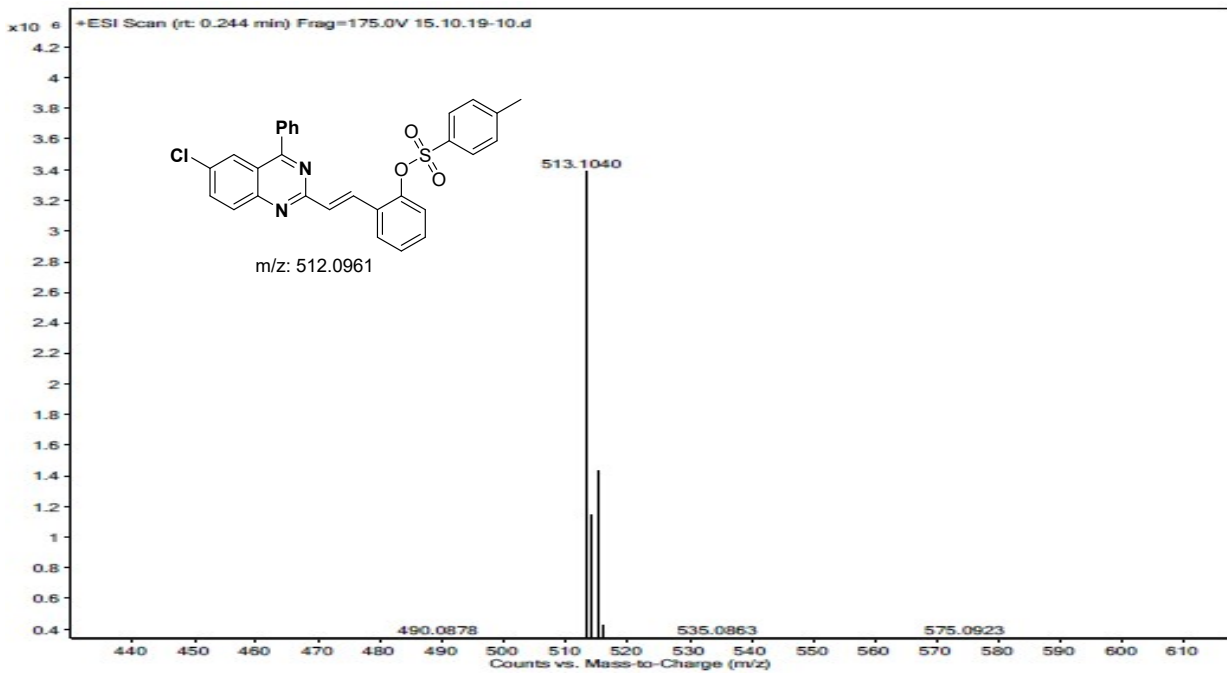

**5-(2-(6-Chloro-4-phenylquinazolin-2-yl)vinyl)-2-methoxyphenyl-4-methylbenzenesulfonate (3f):**

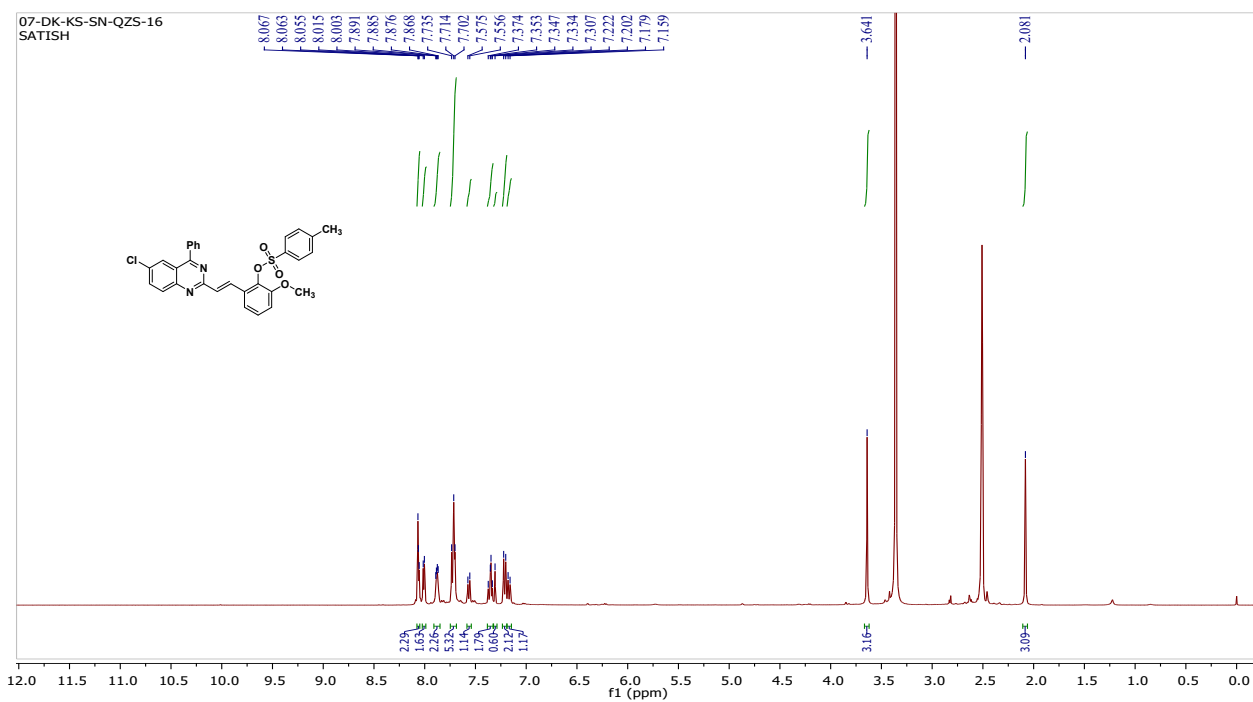

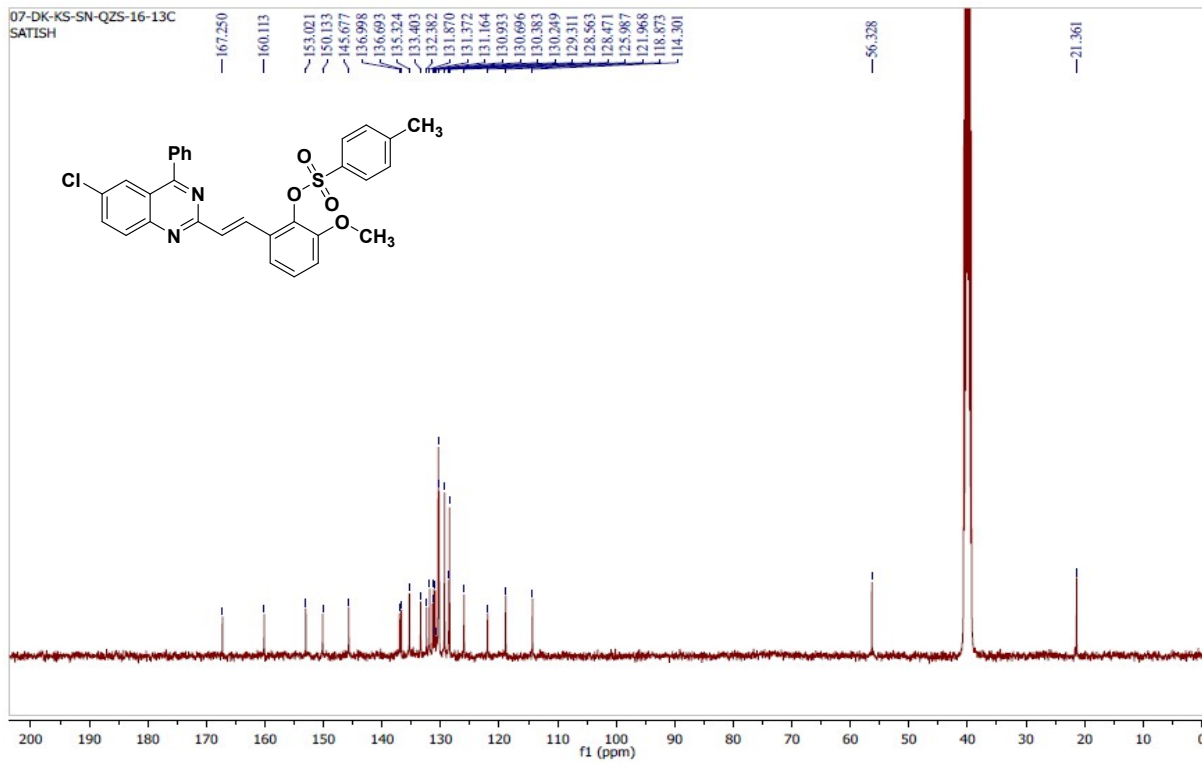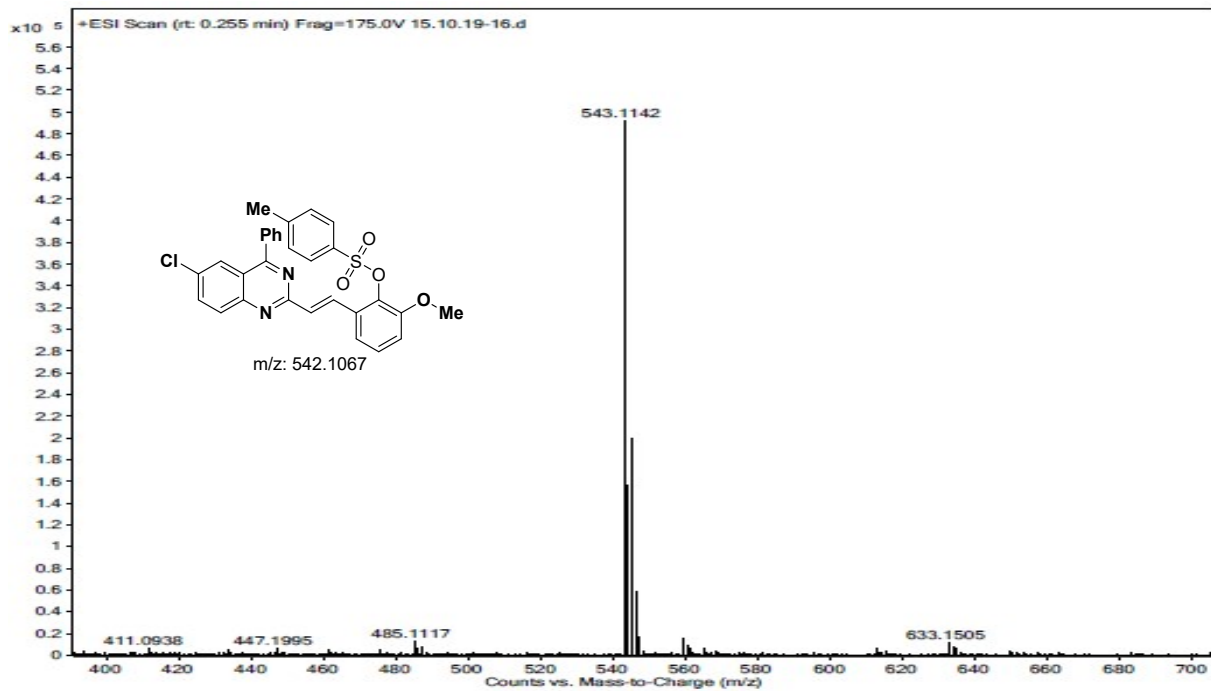



**5-(2-(6-Chloro-4-phenylquinazolin-2-yl)vinyl)-2-methoxyphenyl-4-methylbenzenesulfonate (3g):**

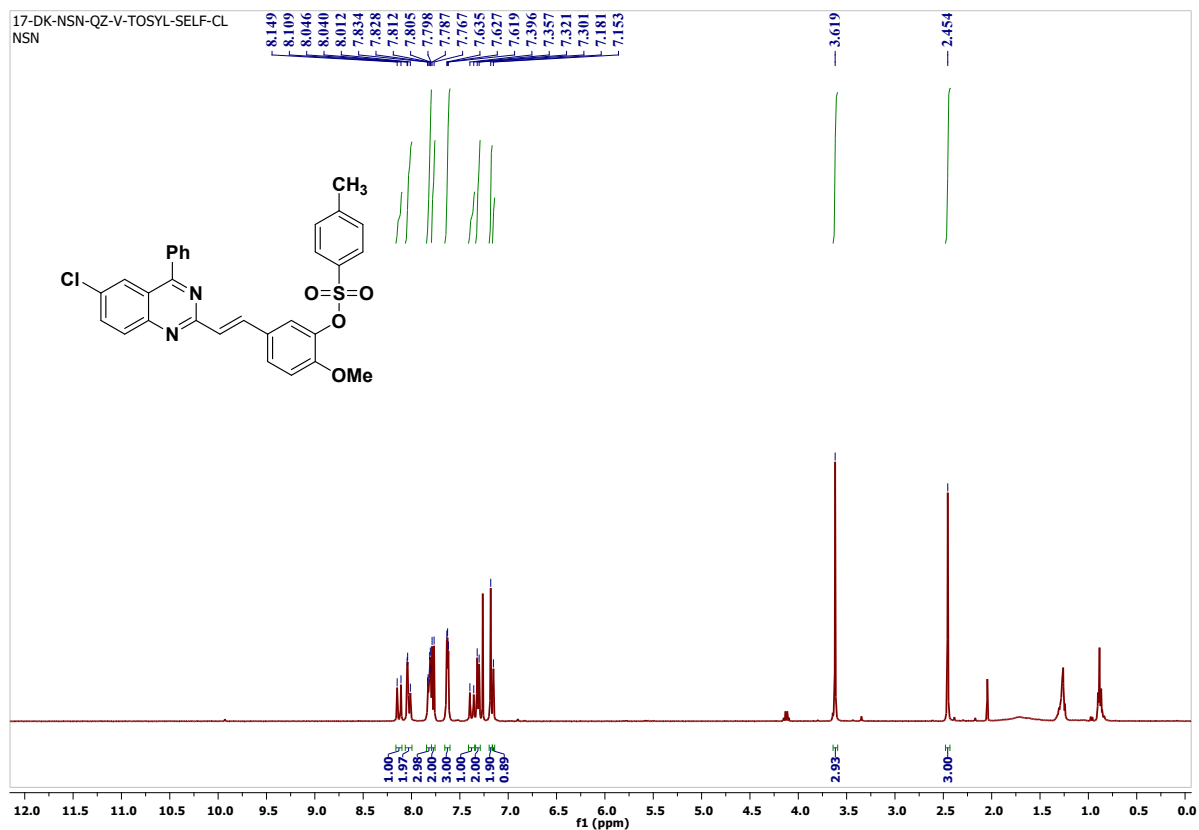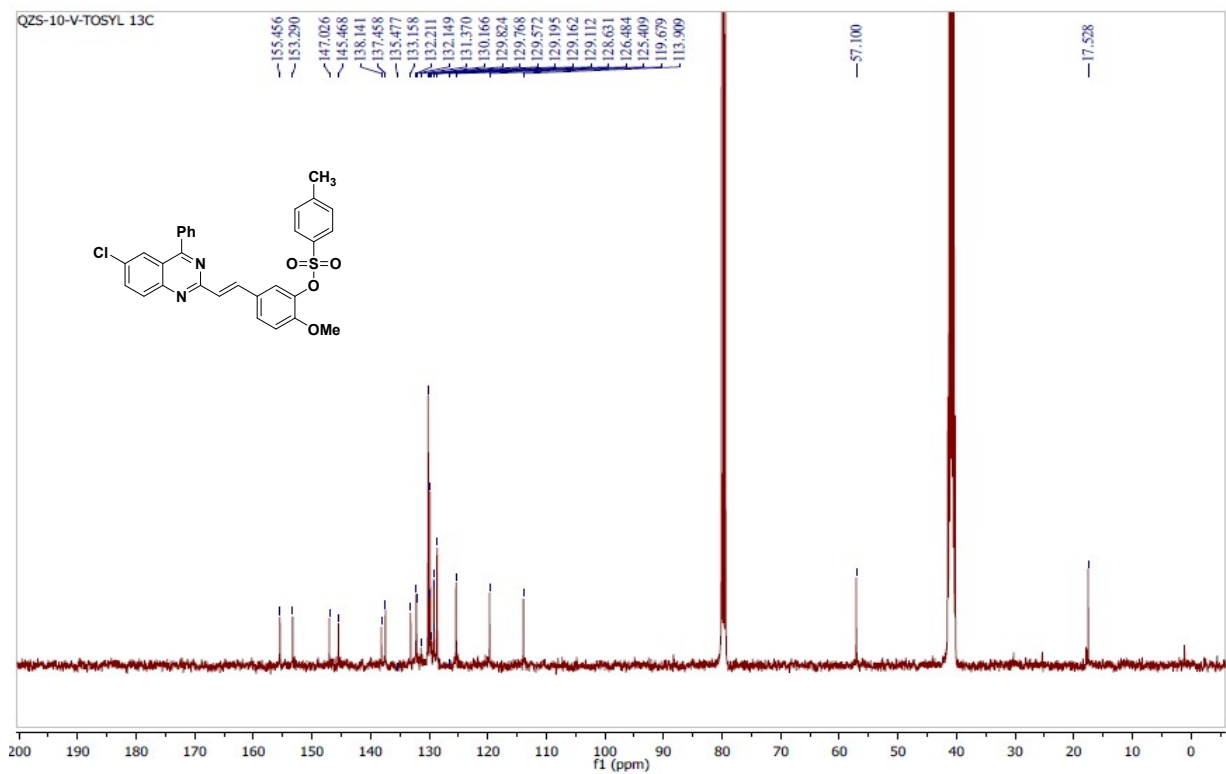

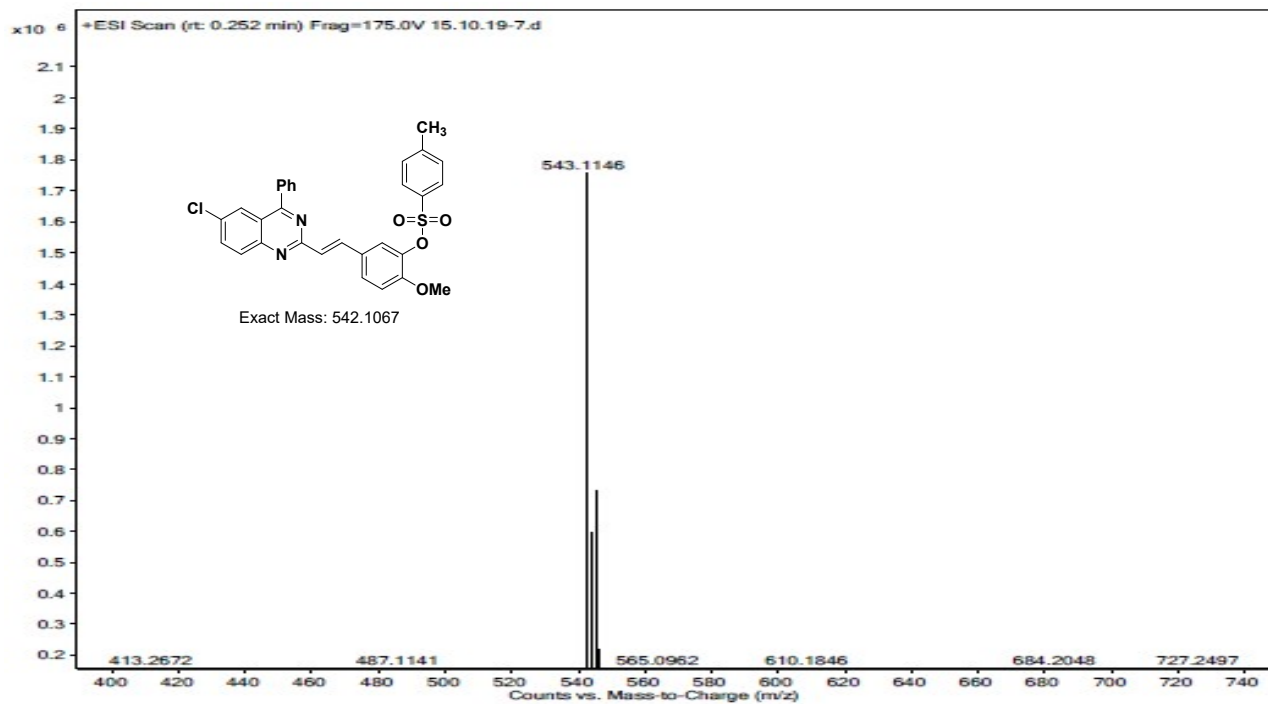

**2-(2-(6-Chloro-4-phenylquinazolin-2-yl)vinyl)-6-methoxyphenyl benzenesulfonate (3h):**

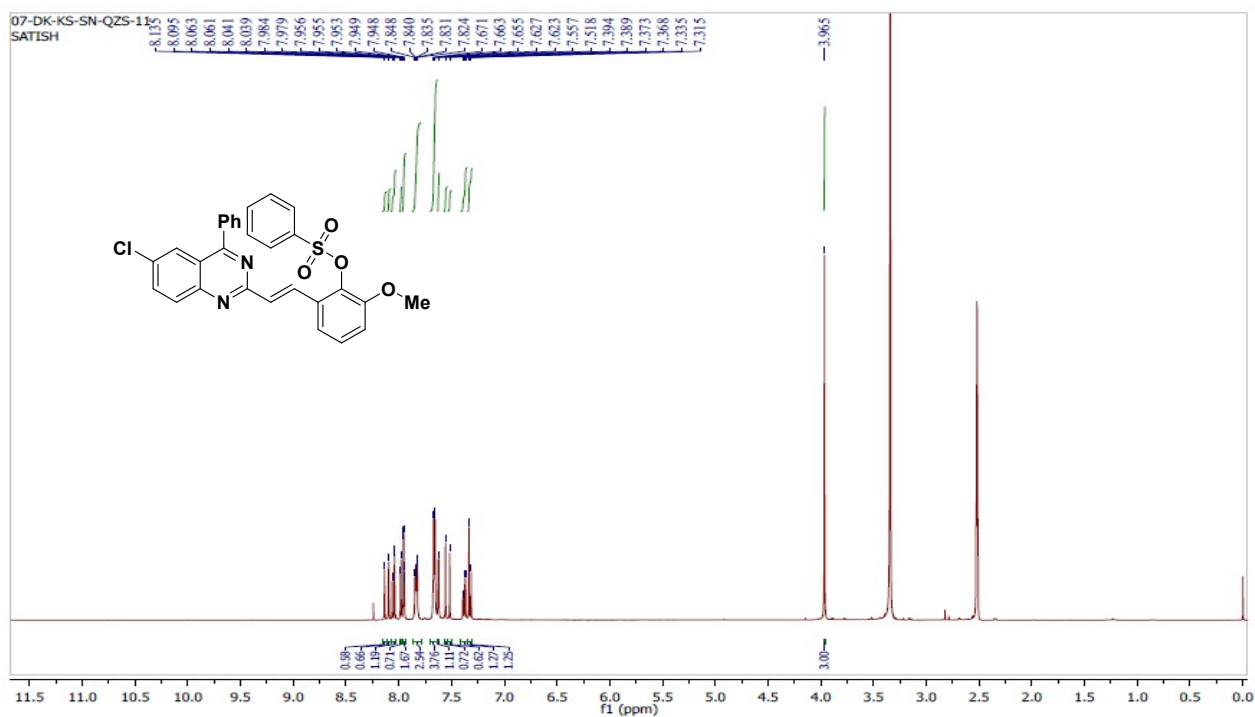

14-DK-NSN-QZ-OV-SLP-C13  
N.SATHYA

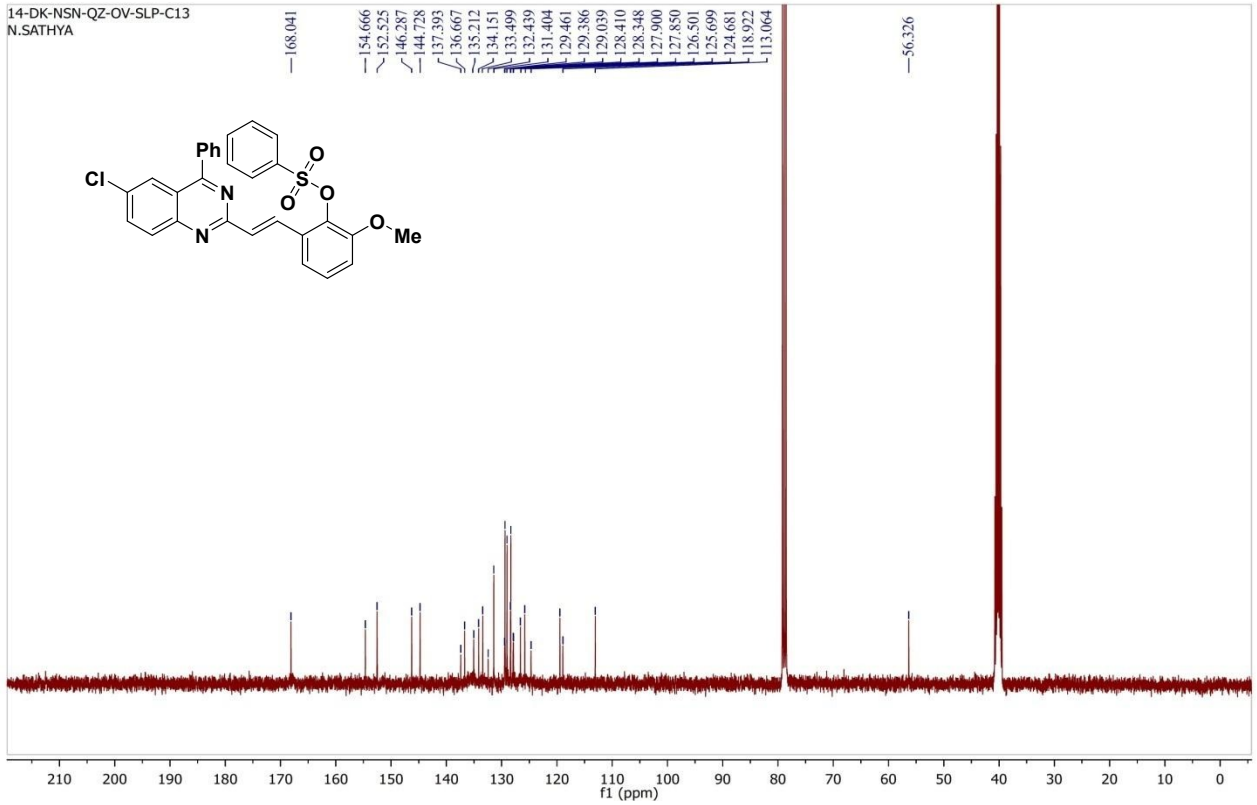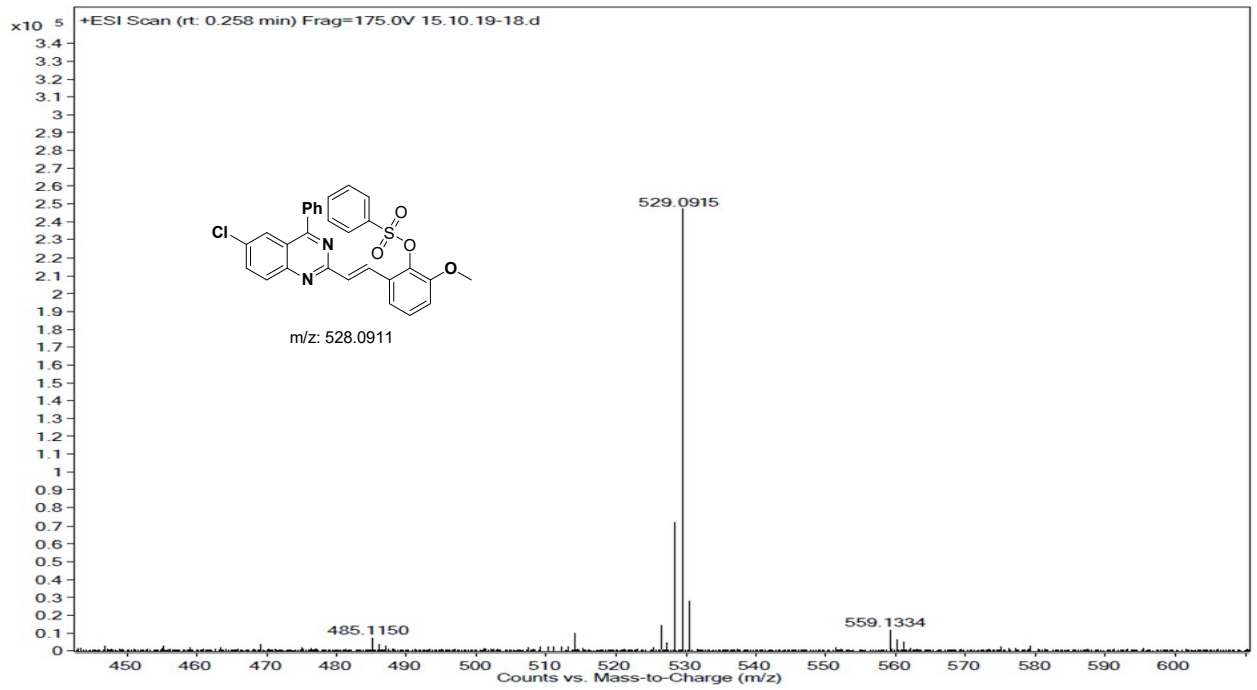

**4-(2-(6-Chloro-4-phenylquinazolin-2-yl)vinyl)-2-methoxyphenyl benzenesulfonate (3i):**

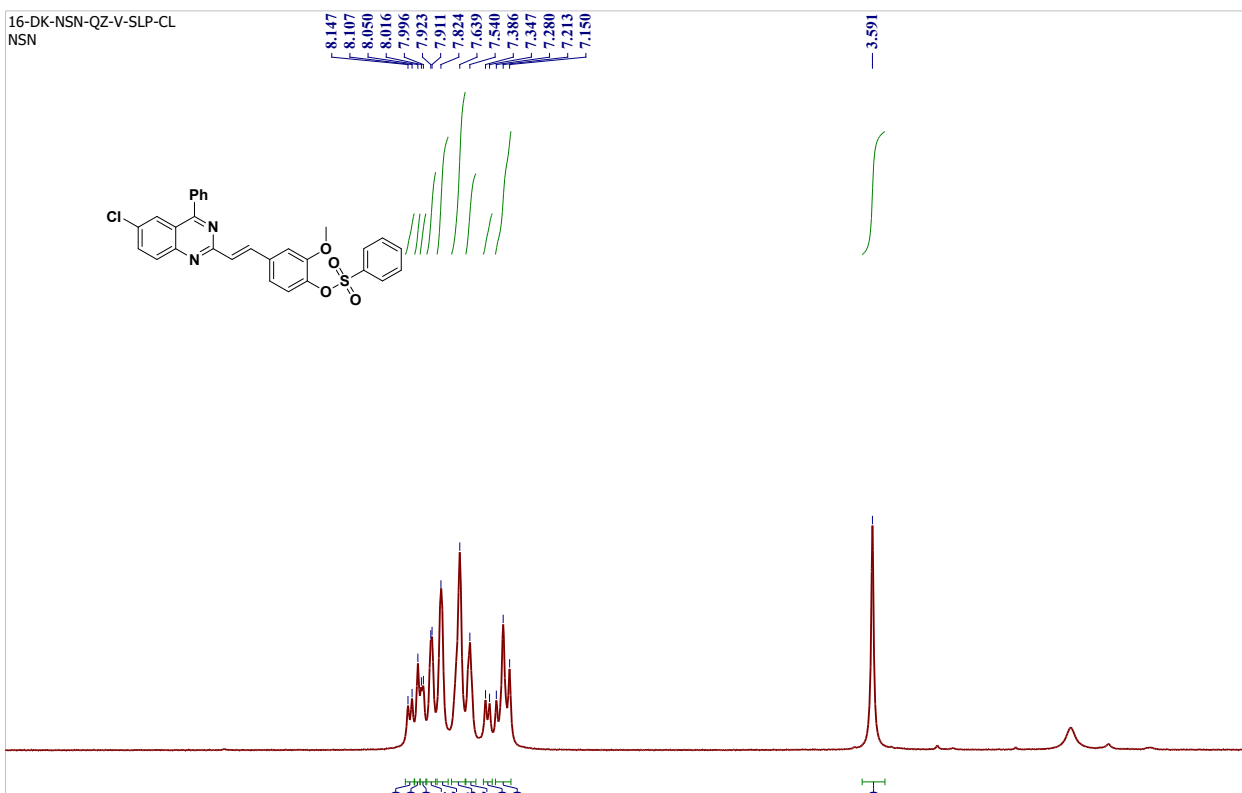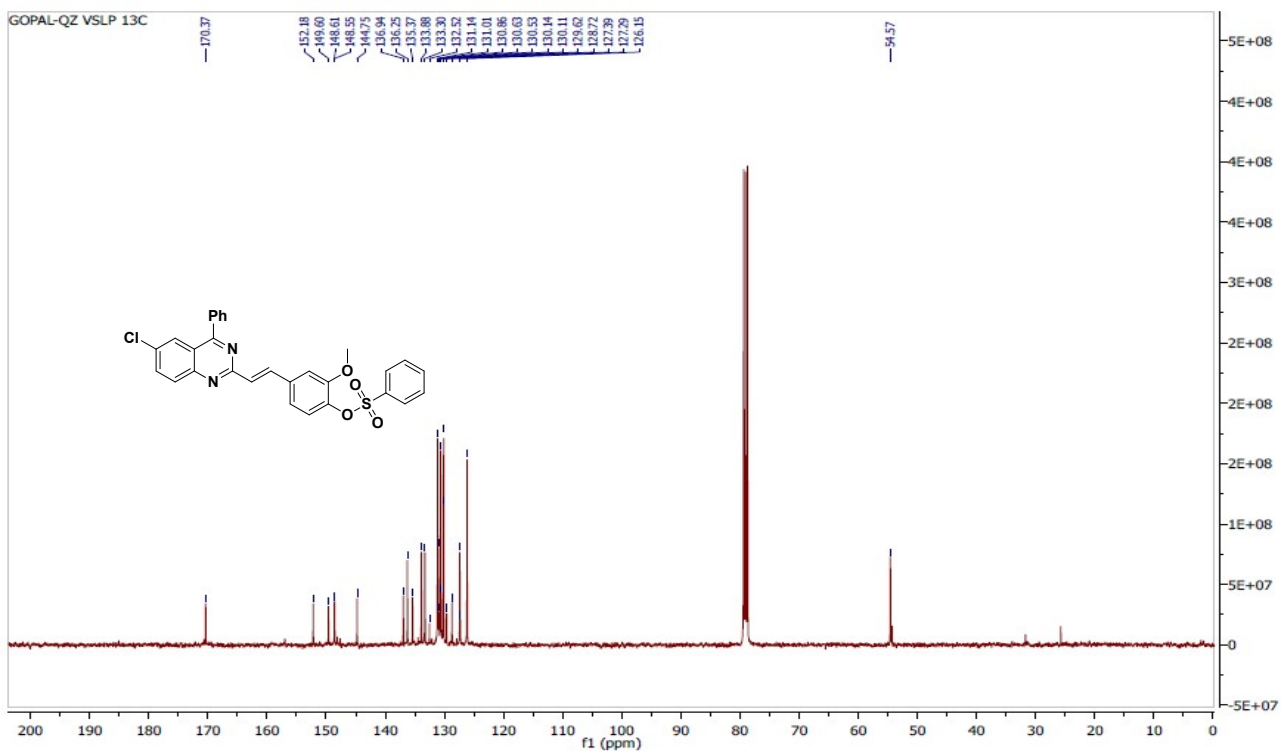

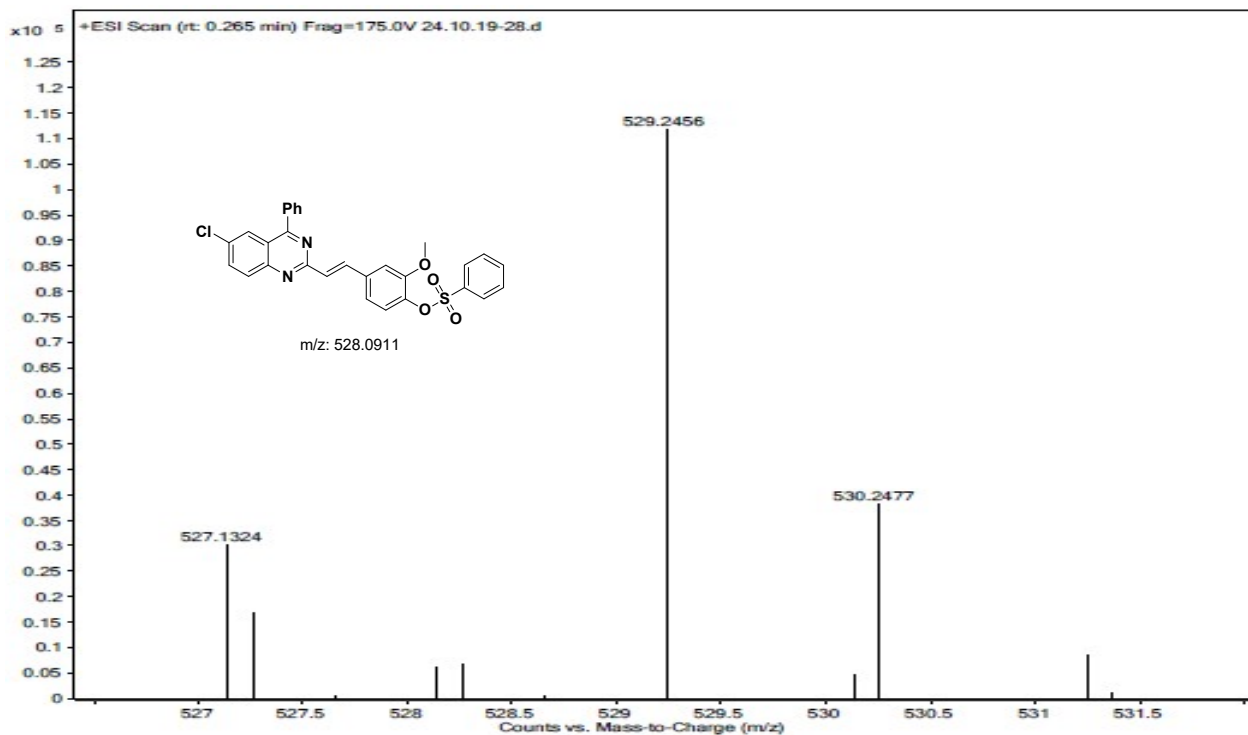

**5-(2-(6-Chloro-4-phenylquinazolin-2-yl)vinyl)-2-methoxyphenyl methanesulfonate (3j):**

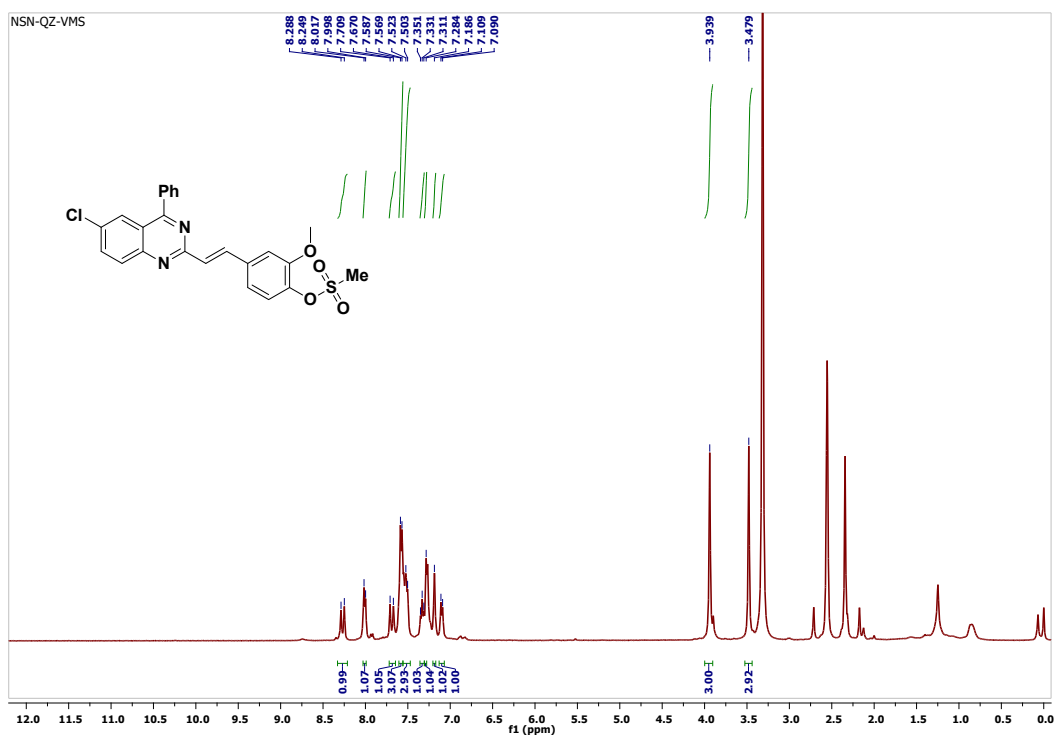

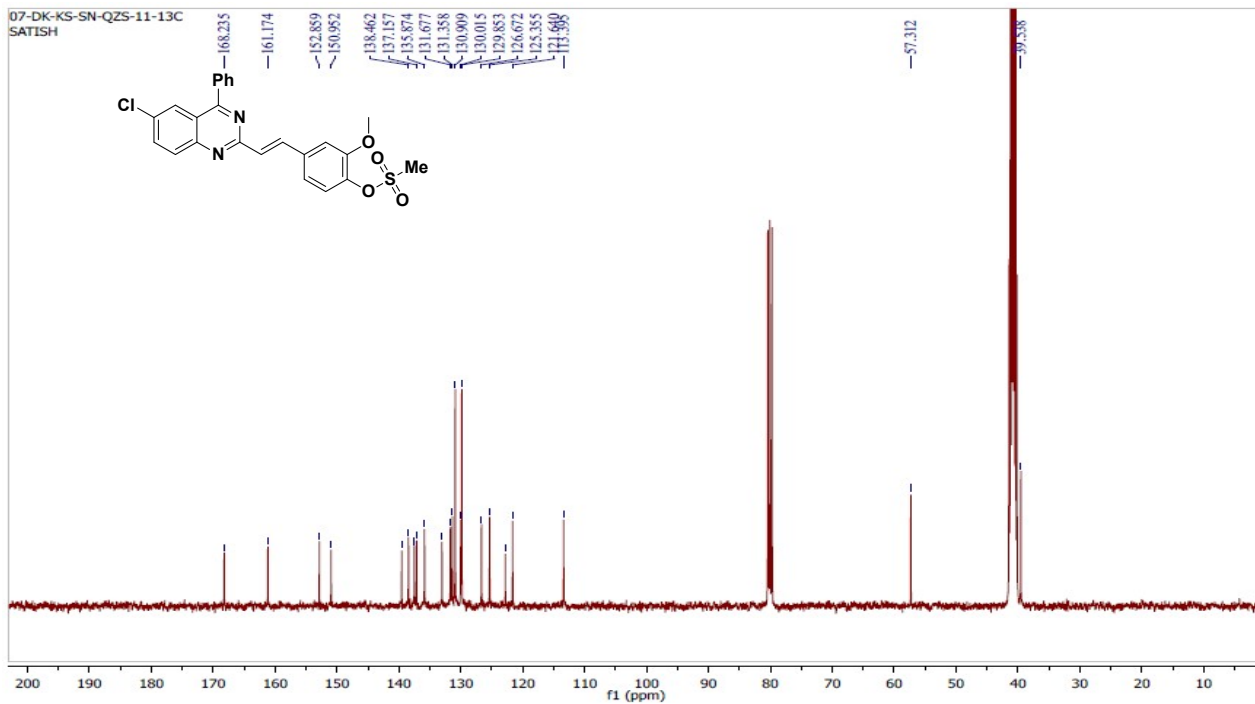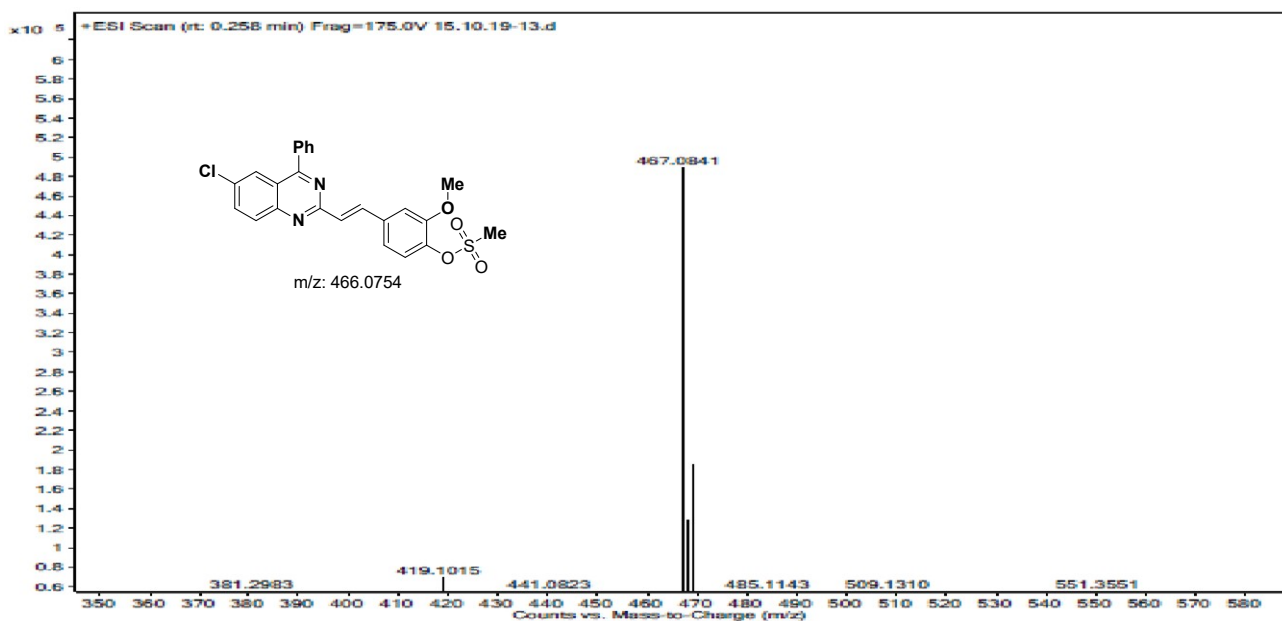

**2-(2-(6-Chloro-4-phenylquinazolin-2-yl)vinyl)phenyl-4-nitrobenzenesulfonate (3k):**

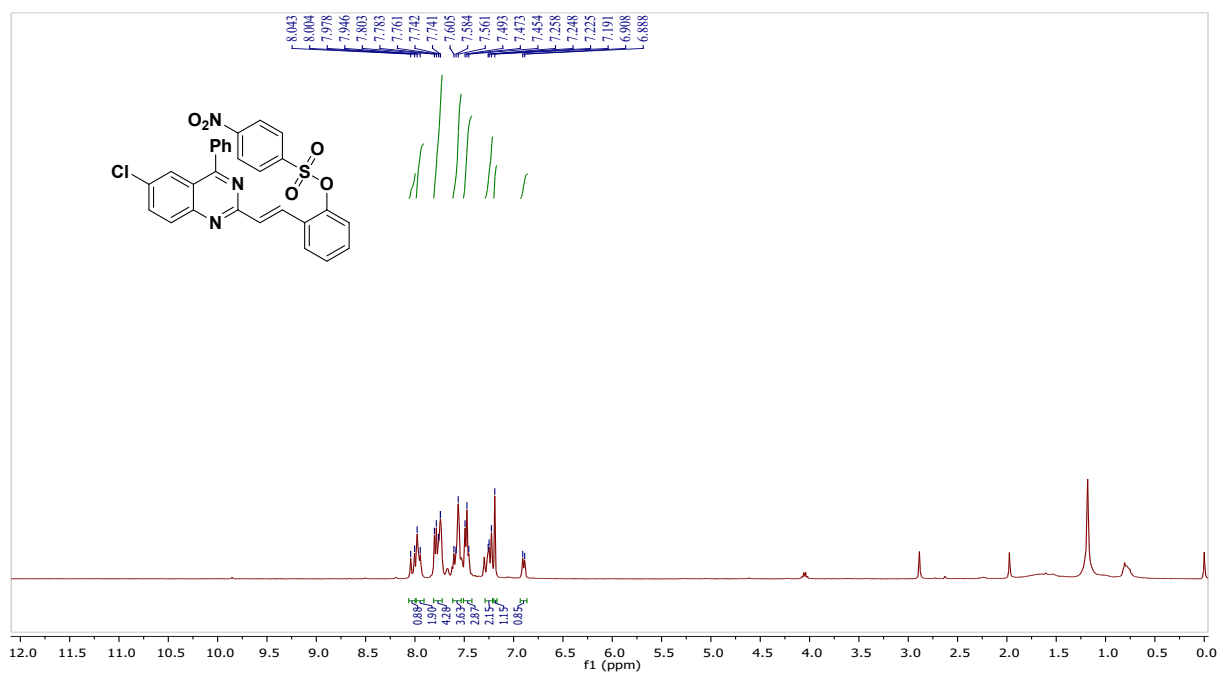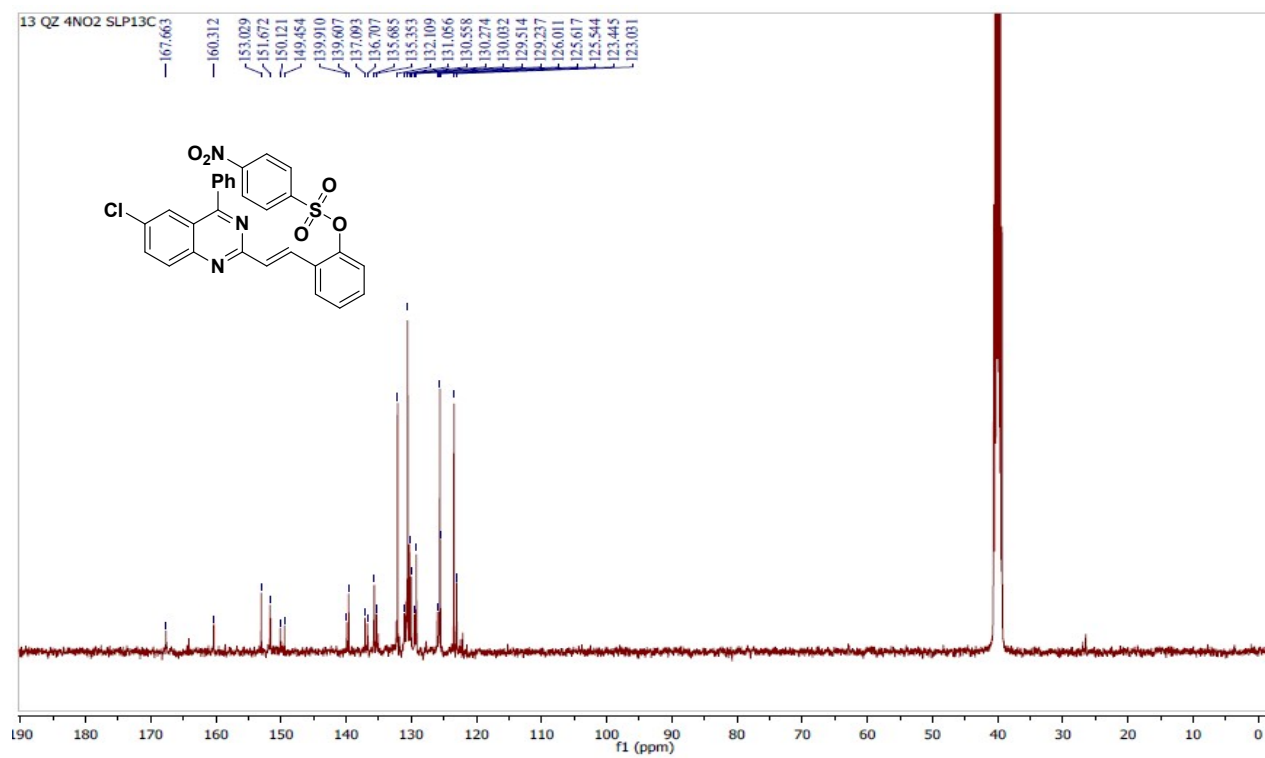

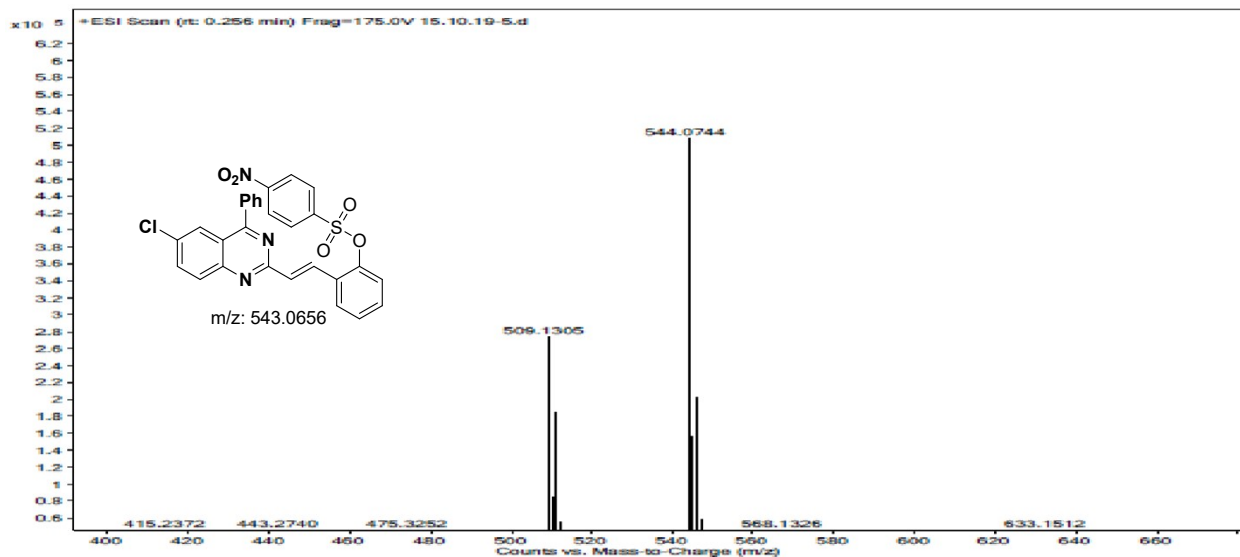

**3-(2-(6-Chloro-4-phenylquinazolin-2-yl)vinyl)phenyl 4-nitrobenzenesulfonate (3l):**

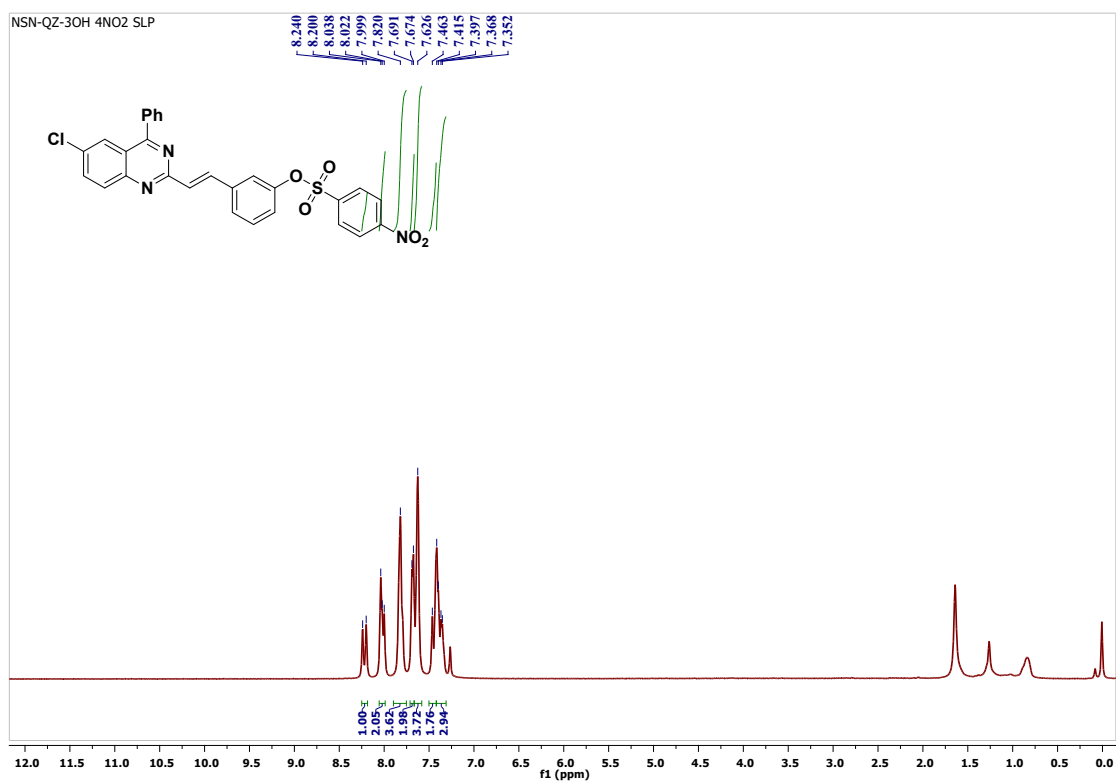



17-DK-NSN-QZ-3OH-4NO2-C13  
N.SATHYA

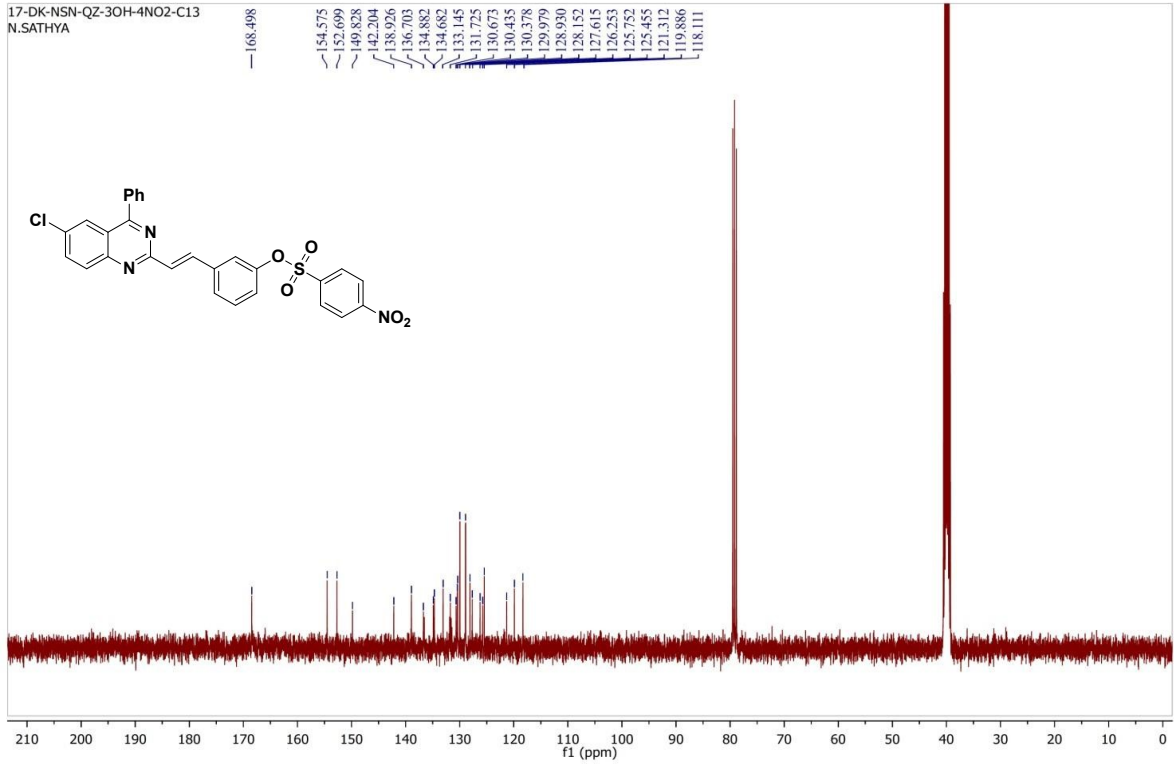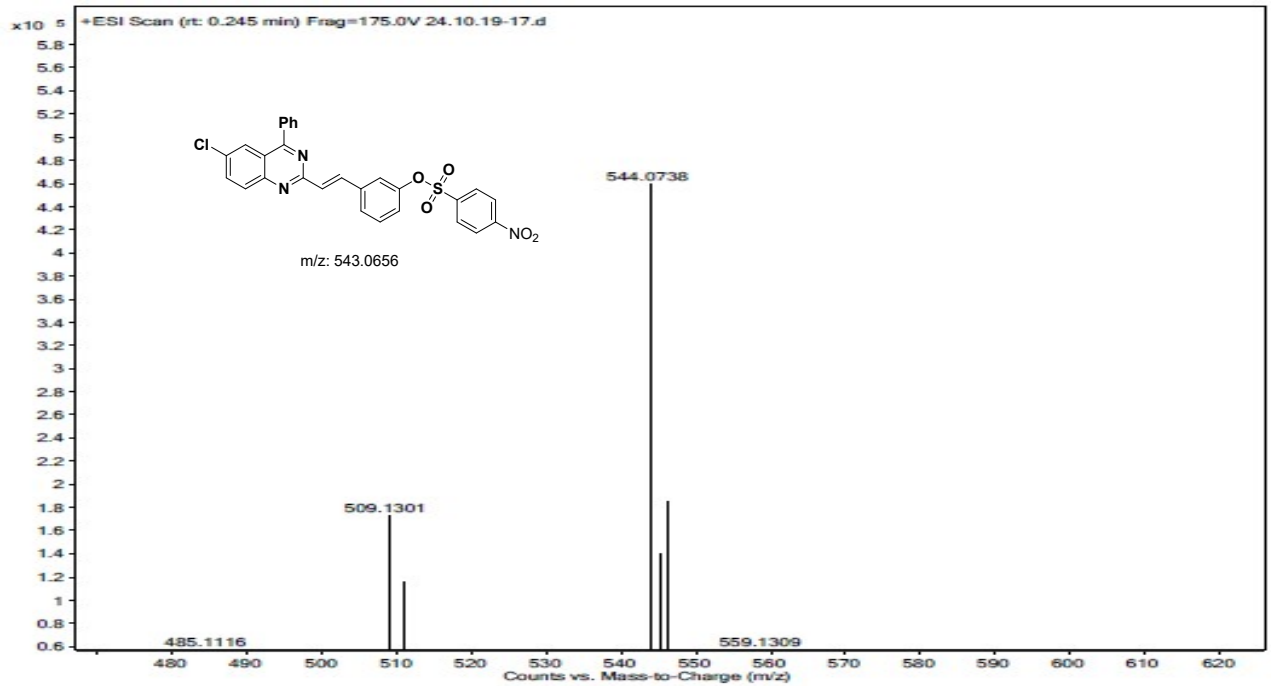

4-(2-(6-Chloro-4-phenylquinazolin-2-yl)vinyl)phenyl-4-nitrobenzenesulfonate (3m):

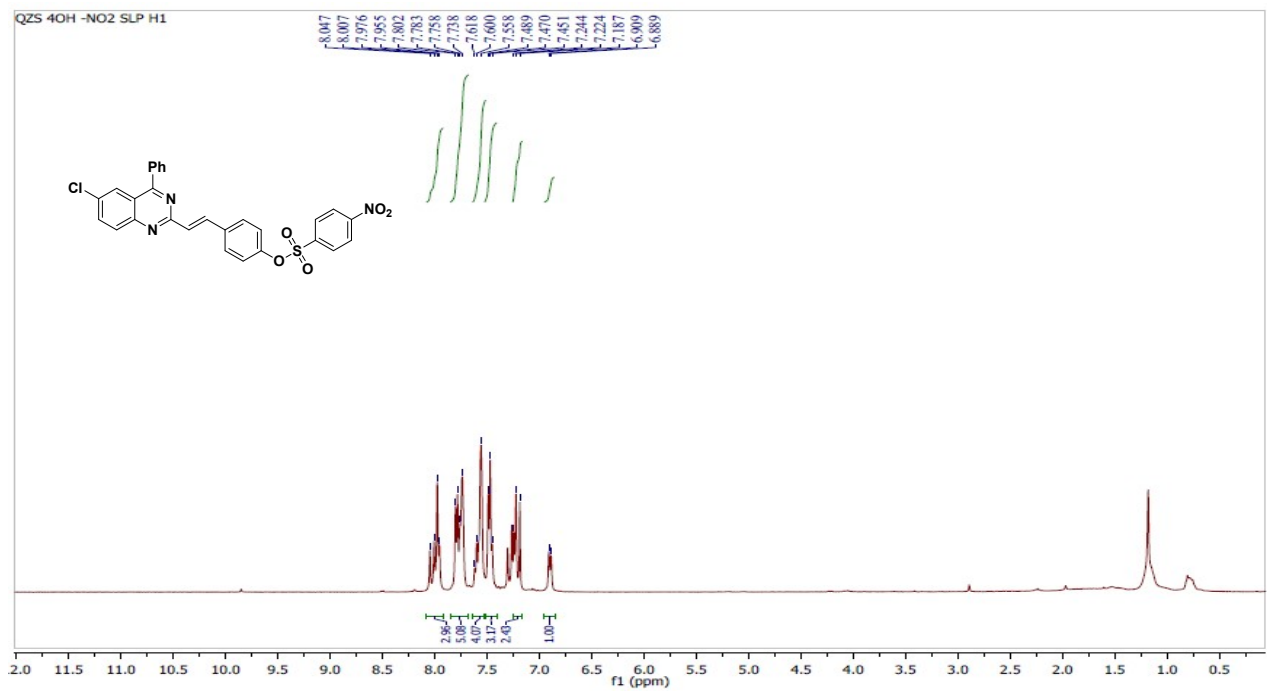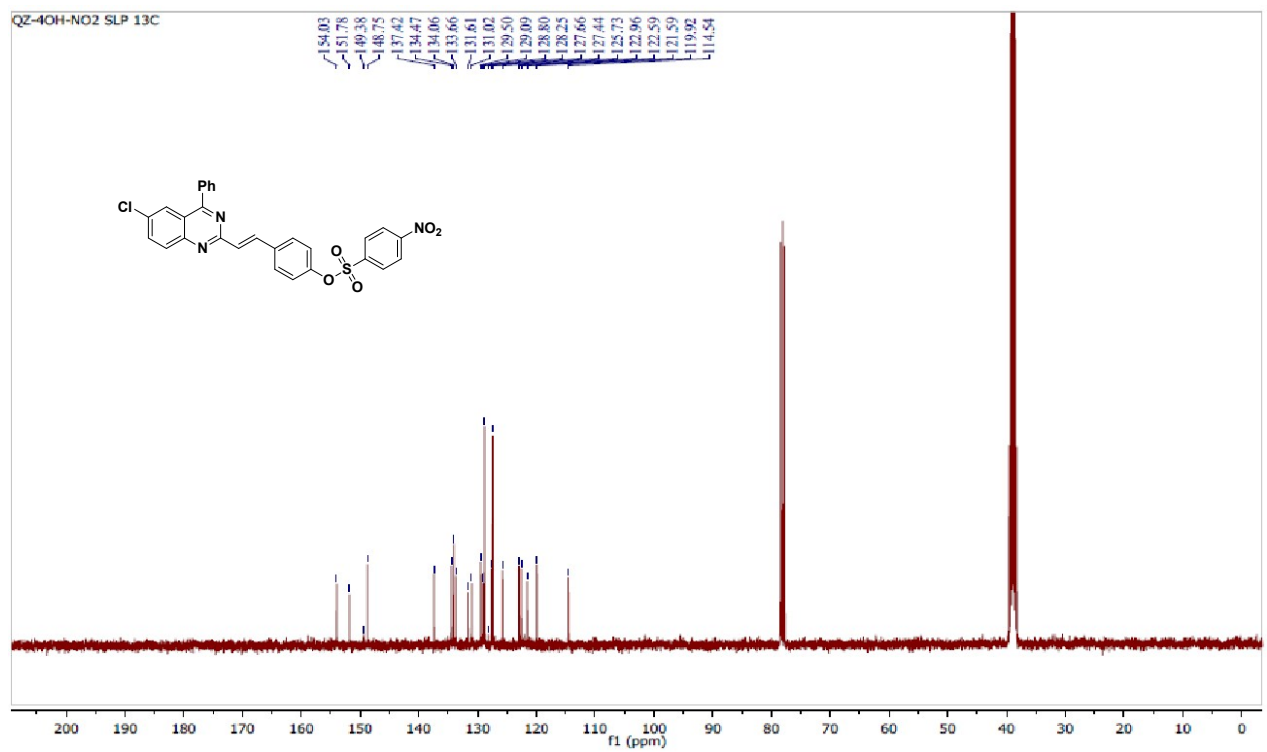

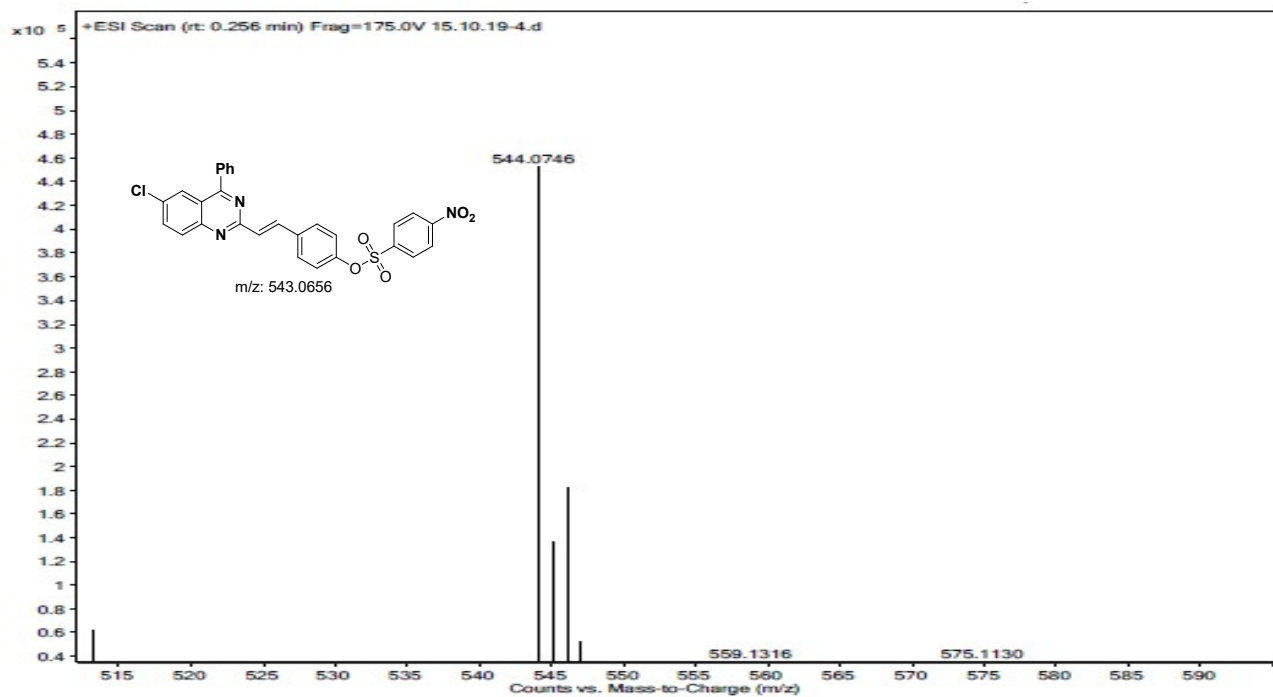

**4-(2-(6-Chloro-4-phenylquinazolin-2-yl)vinyl)phenyl-4-nitro-3-(trifluoromethyl) benzene sulfonate (3n):**

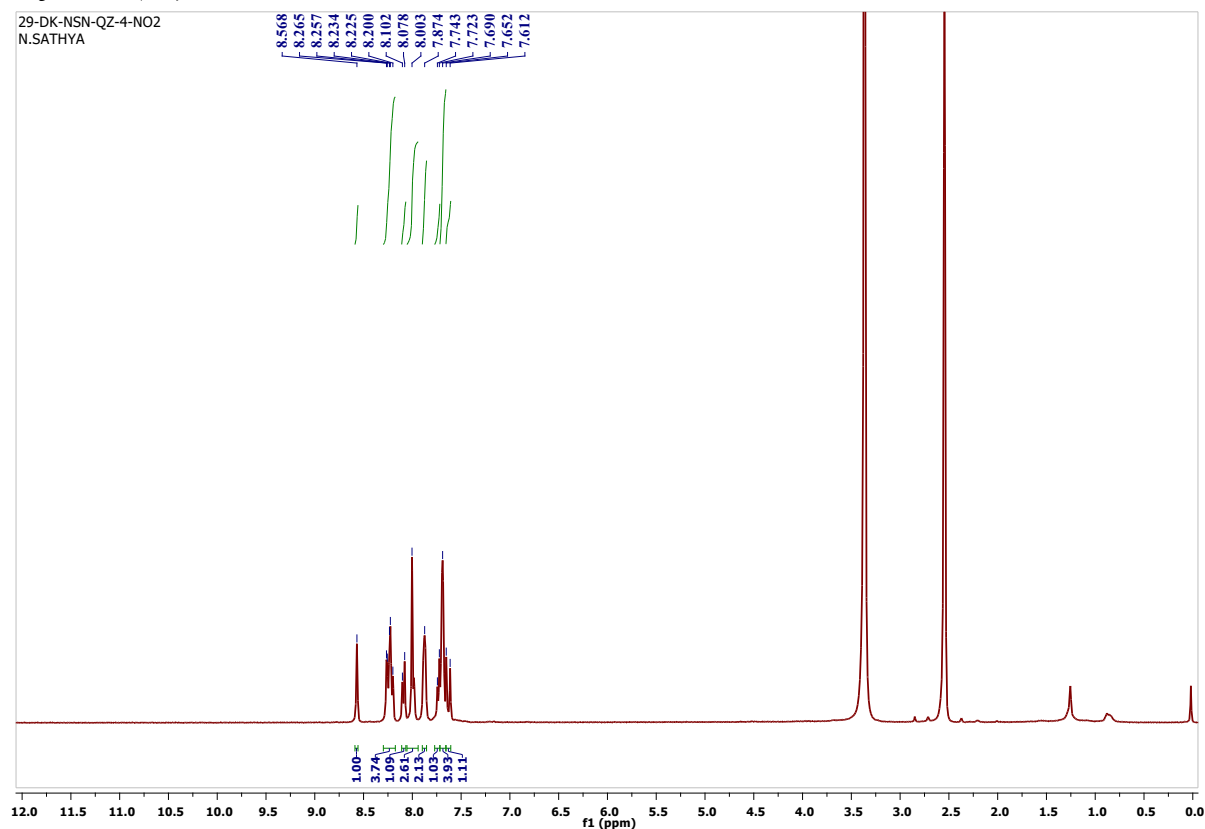

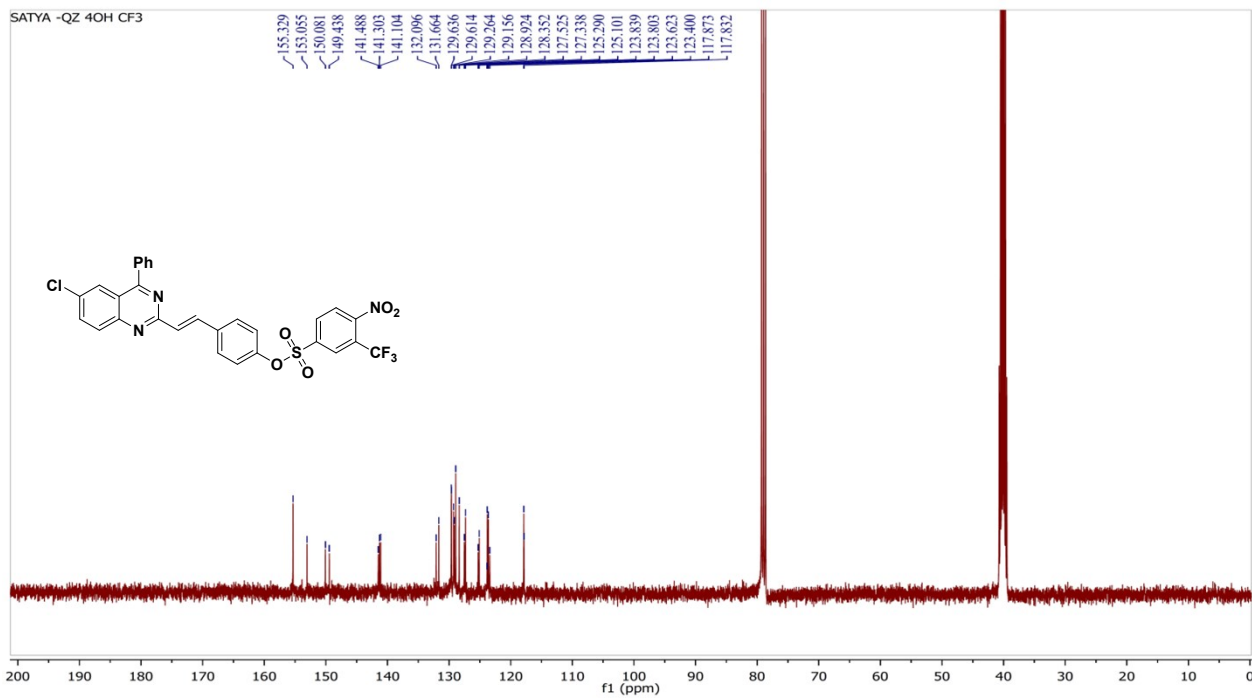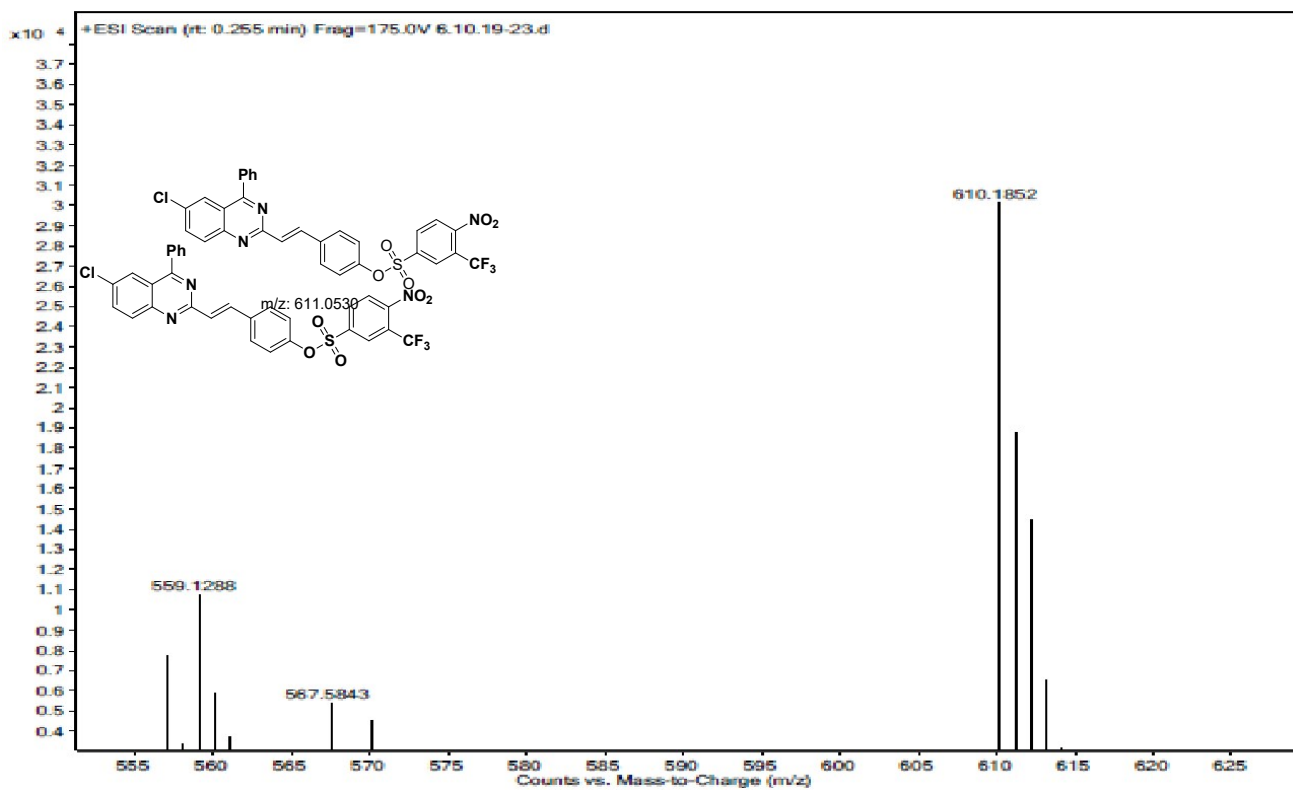

**2-(2-(6-Chloro-4-phenylquinazolin-2-yl)vinyl)-6-methoxyphenyl-4-nitrobenzenesulfonate (30):**

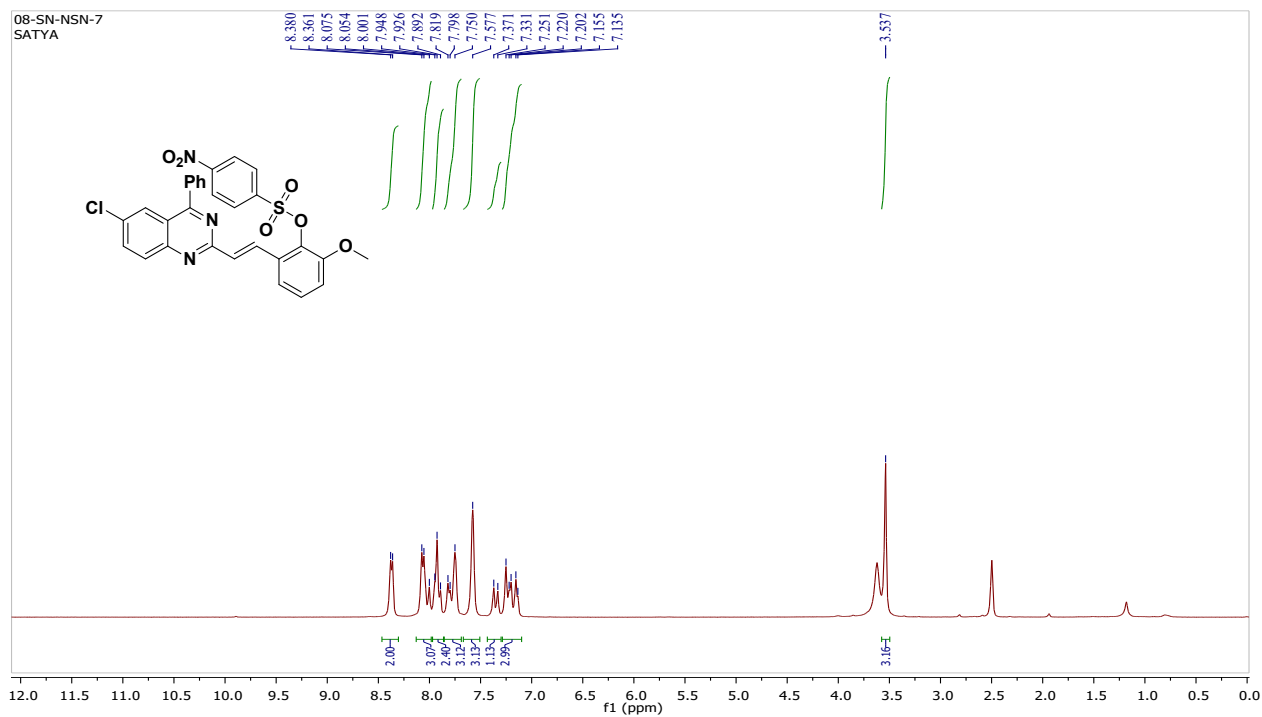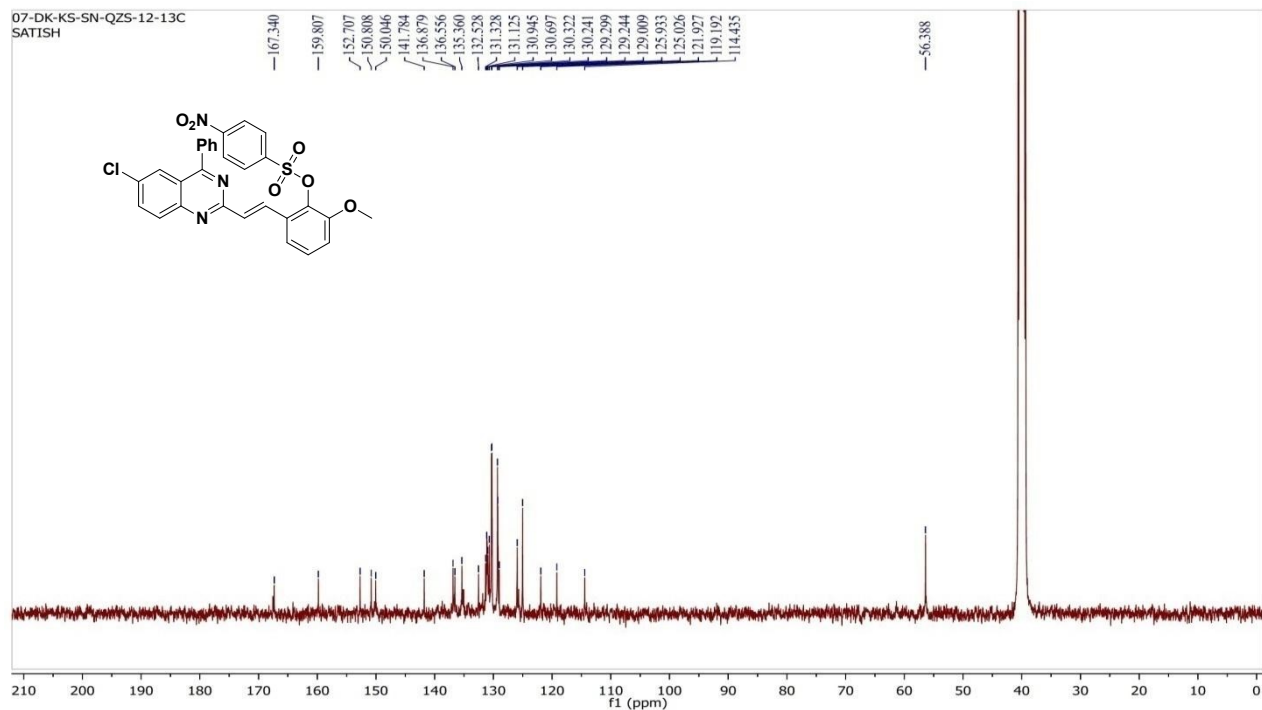

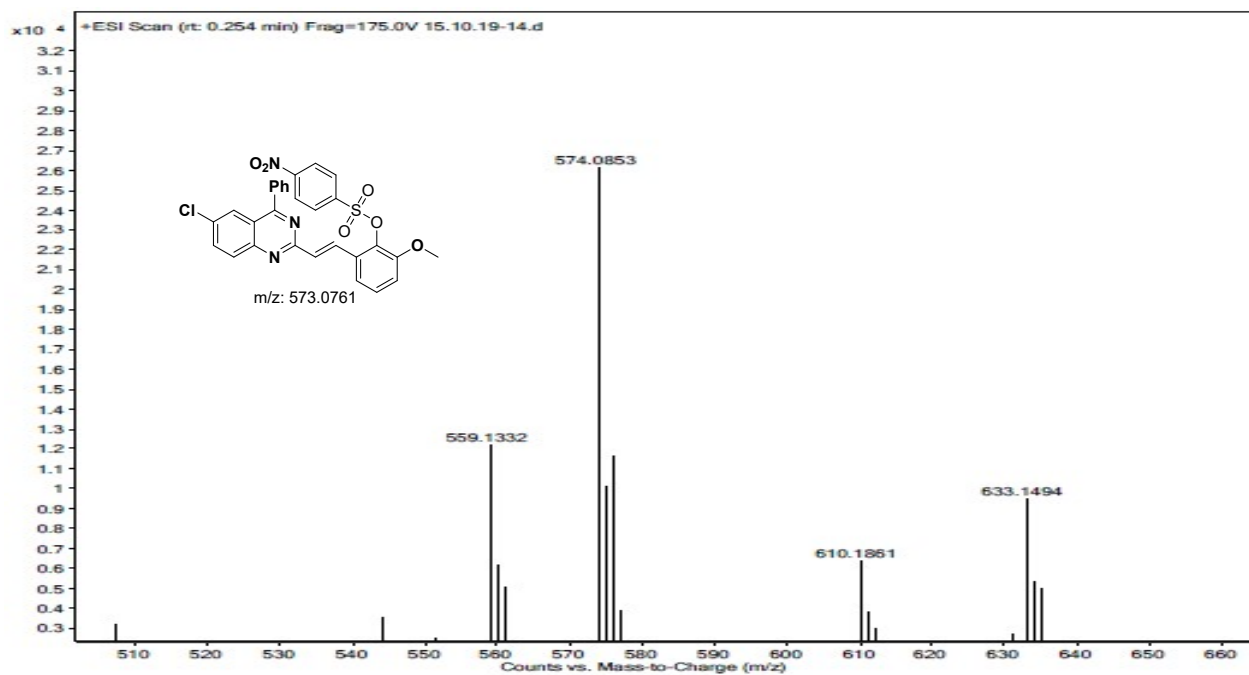

**5-(2-(6-Chloro-4-phenylquinazolin-2-yl)vinyl)-2-methoxyphenyl-4-nitrobenzenesulfonate (3p):**

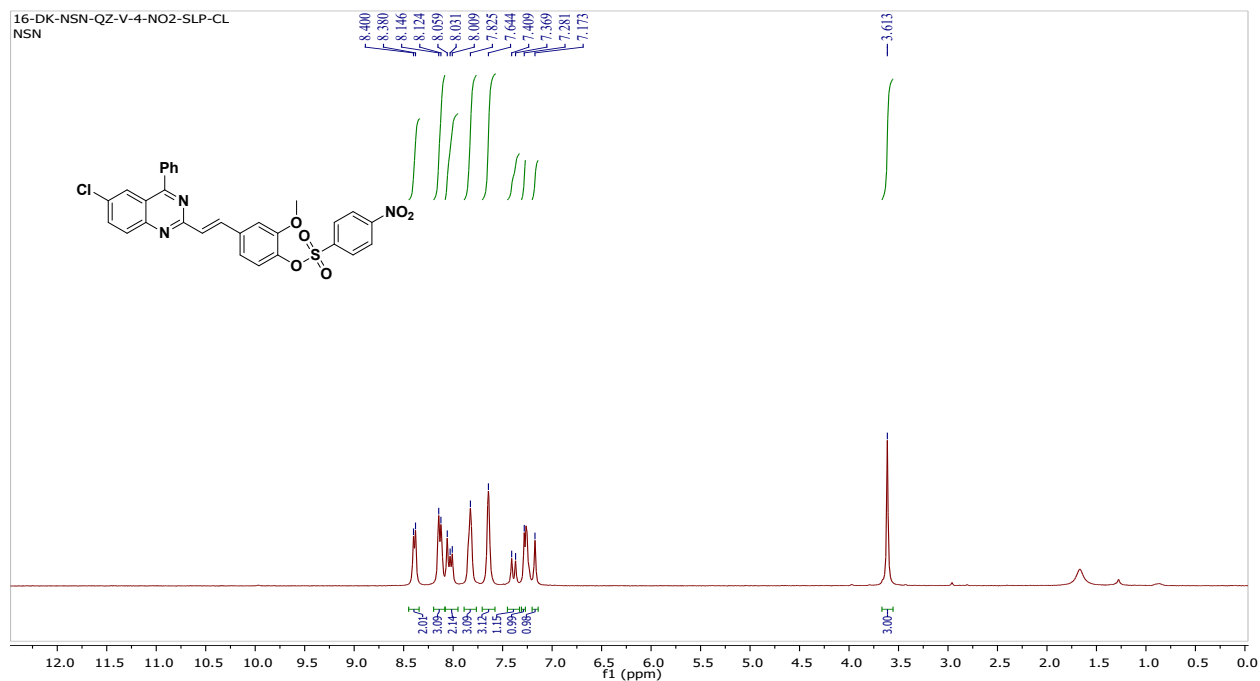

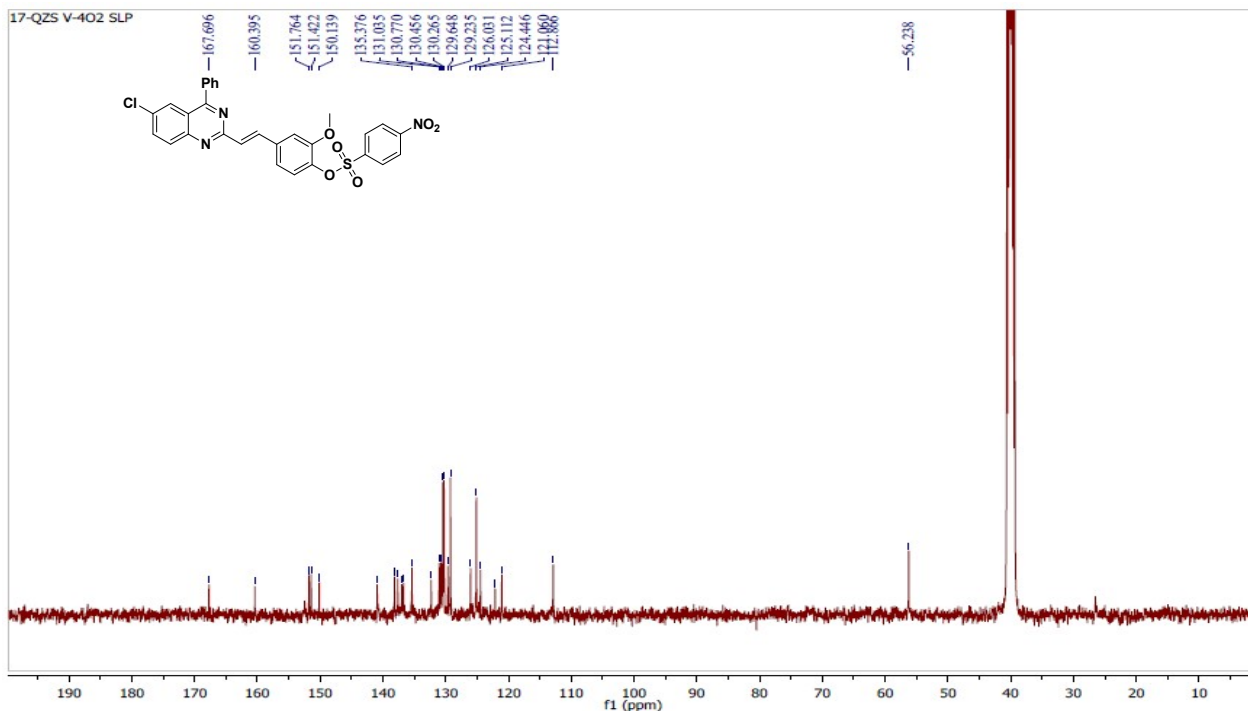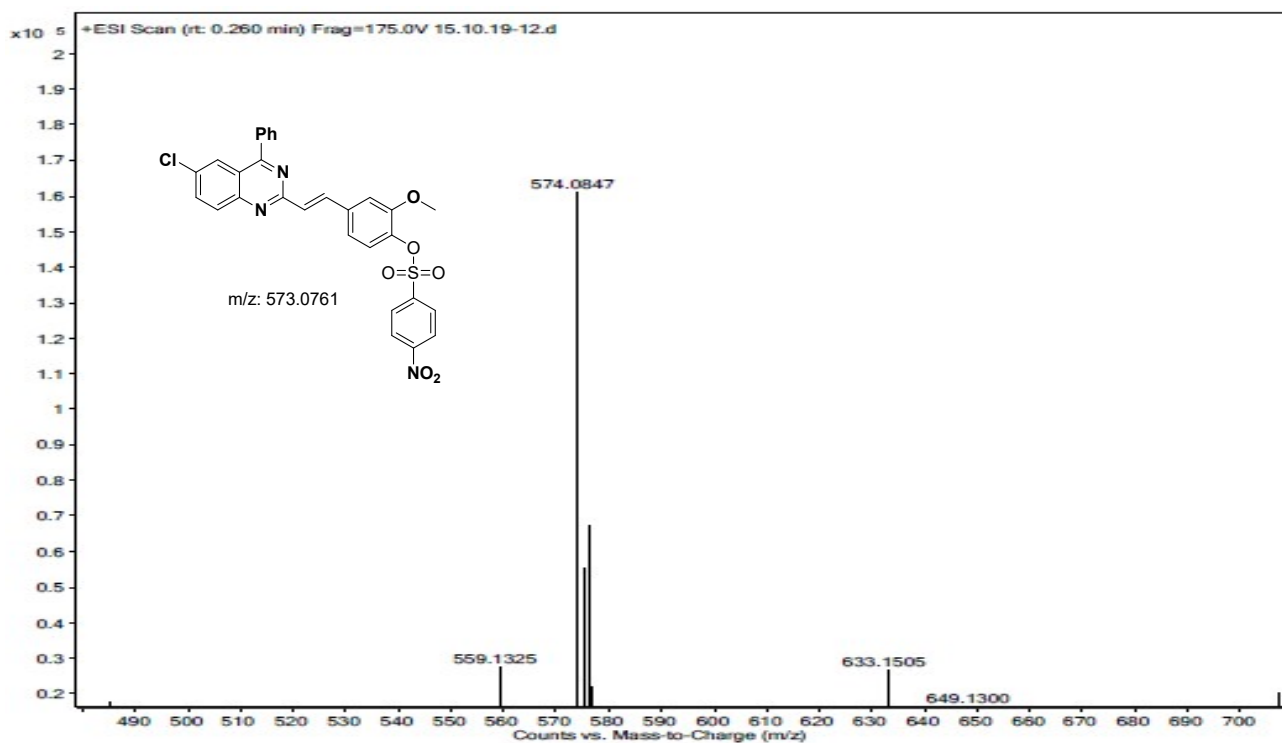

**4-(2-(6-Chloro-4-phenylquinazolin-2-yl)vinyl)-2-methoxyphenyl,3-nitro-4-(tri fluoromethyl) benzenesulfonate (3q):**

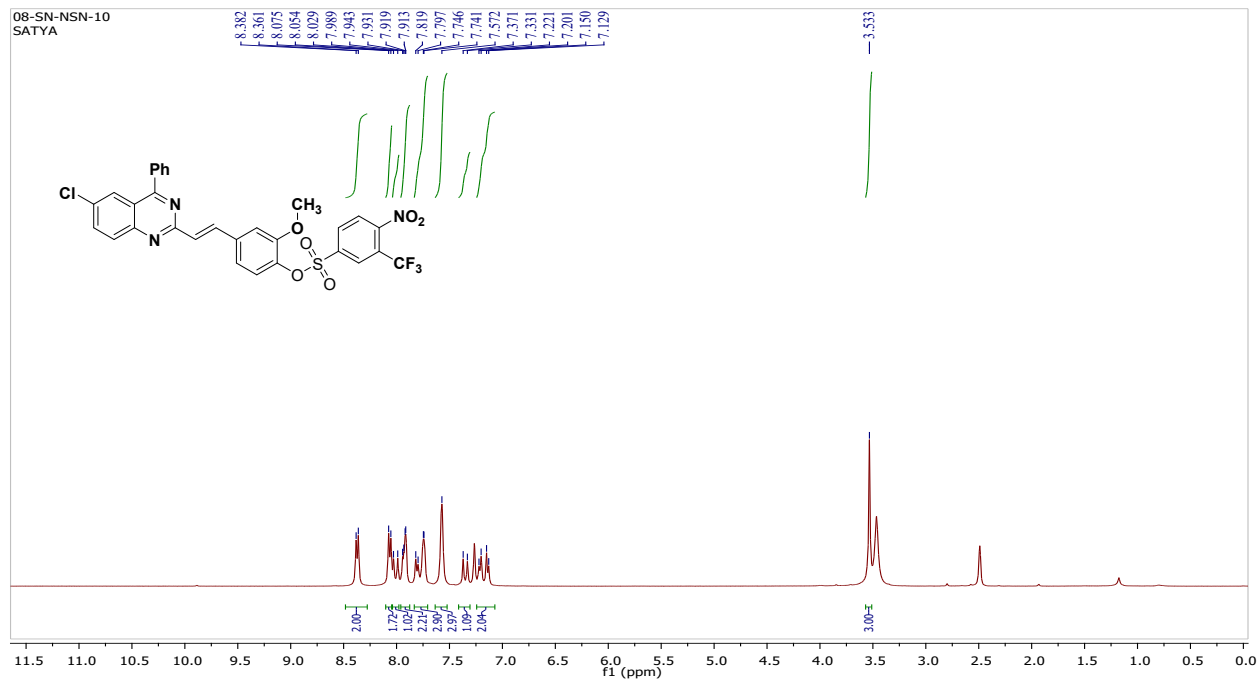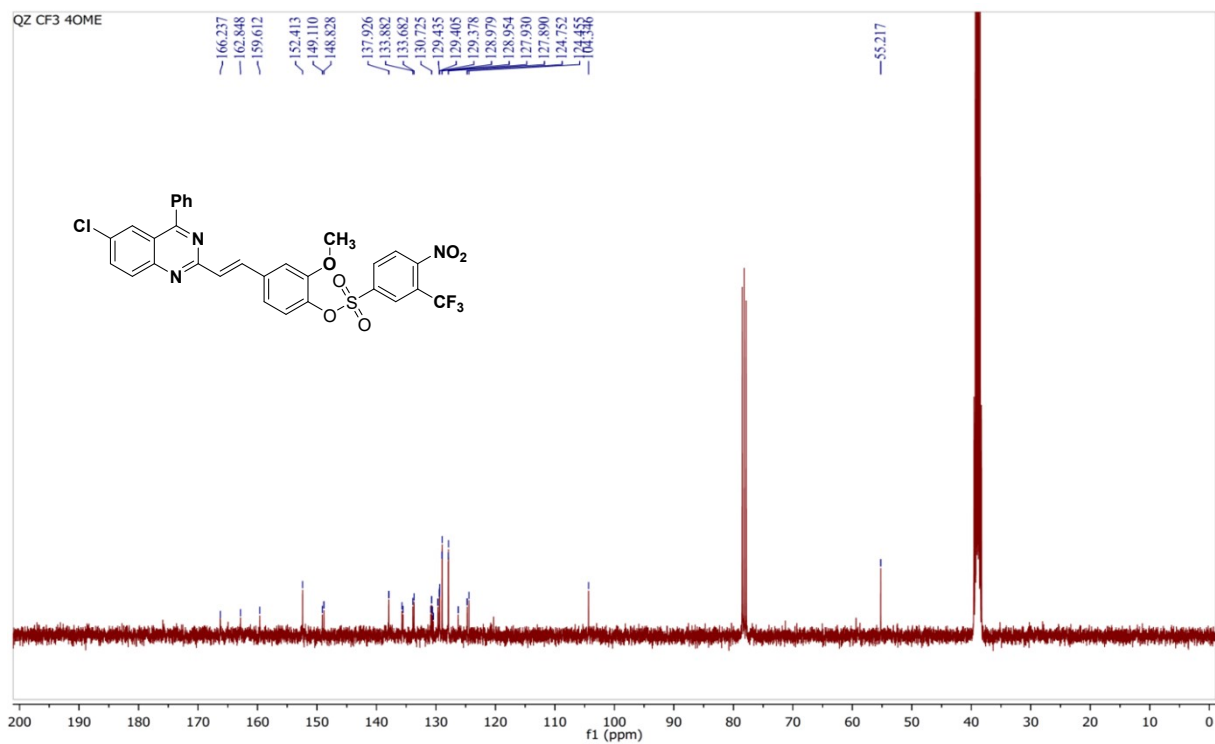



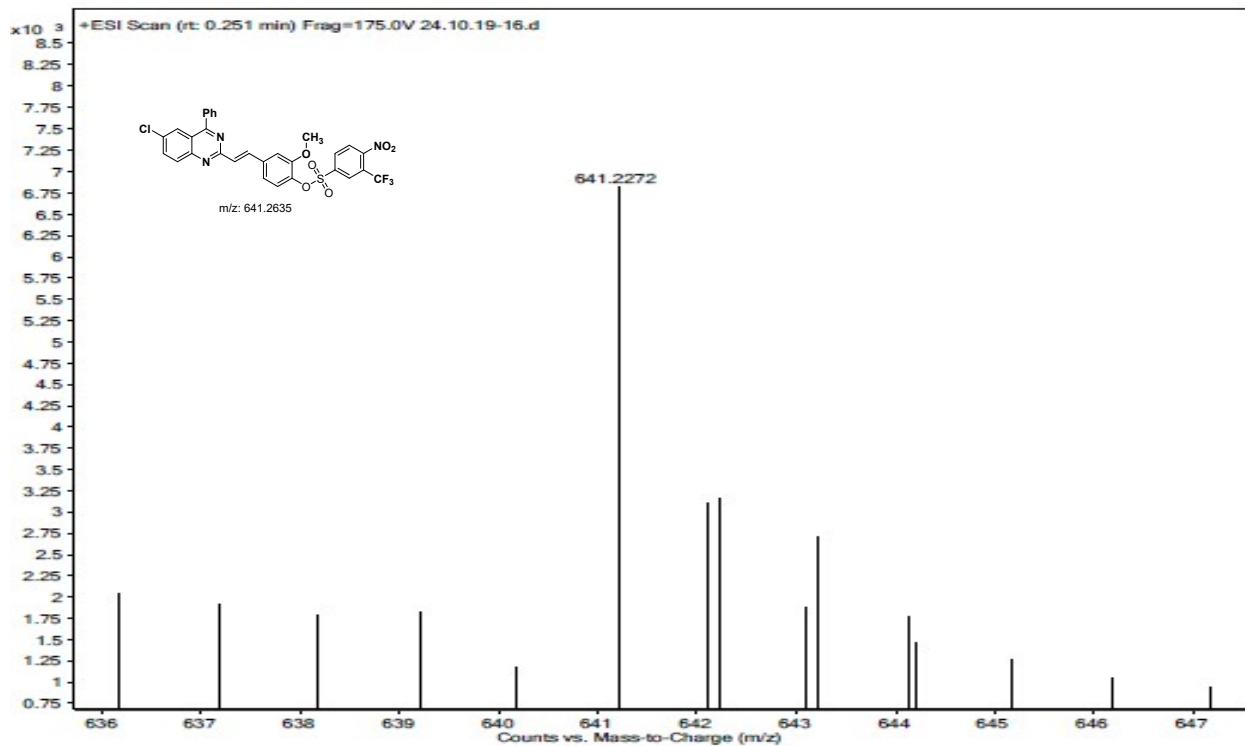

**(E)-4-(2-(4-phenylquinazolin-2-yl)vinyl)phenyl benzenesulfonate (3r)**

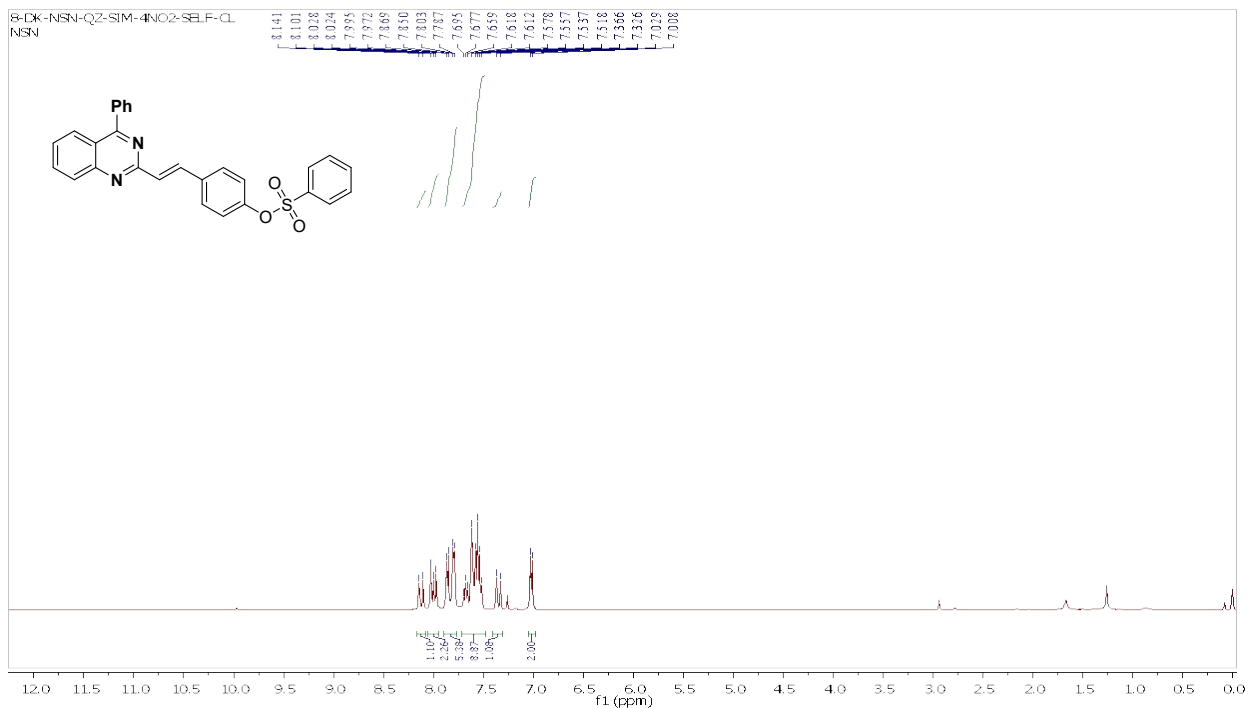

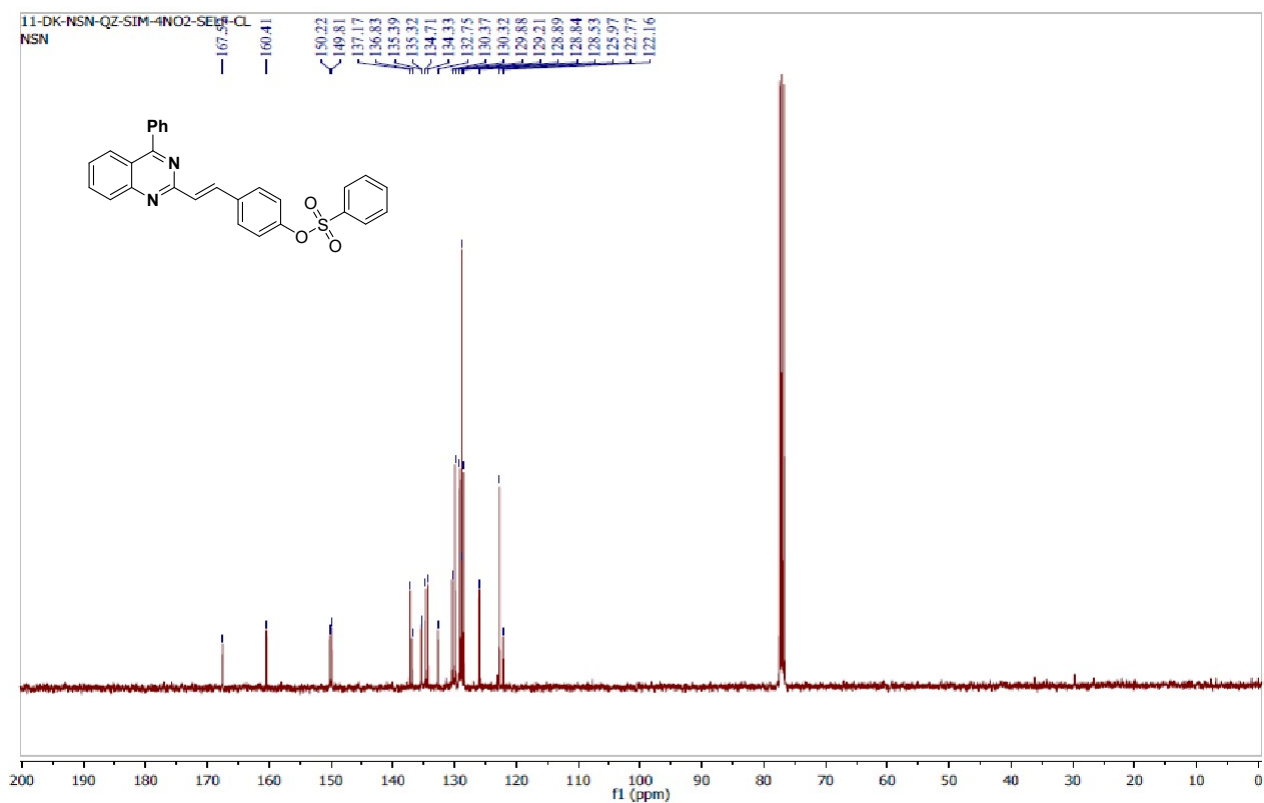

**2-(2-(3-Hydroxyquinoxalin-2-yl)vinyl)phenyl methanesulfonate (5a):**

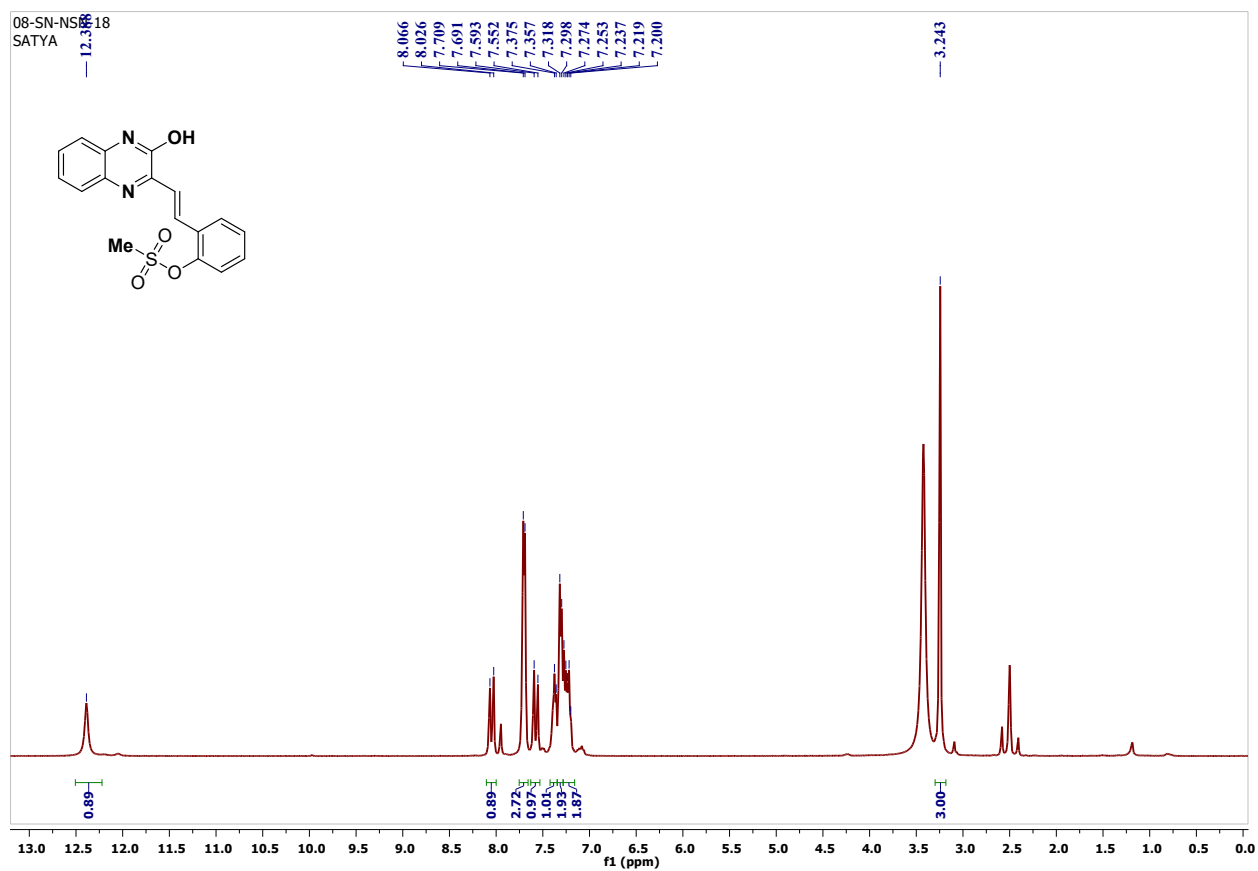

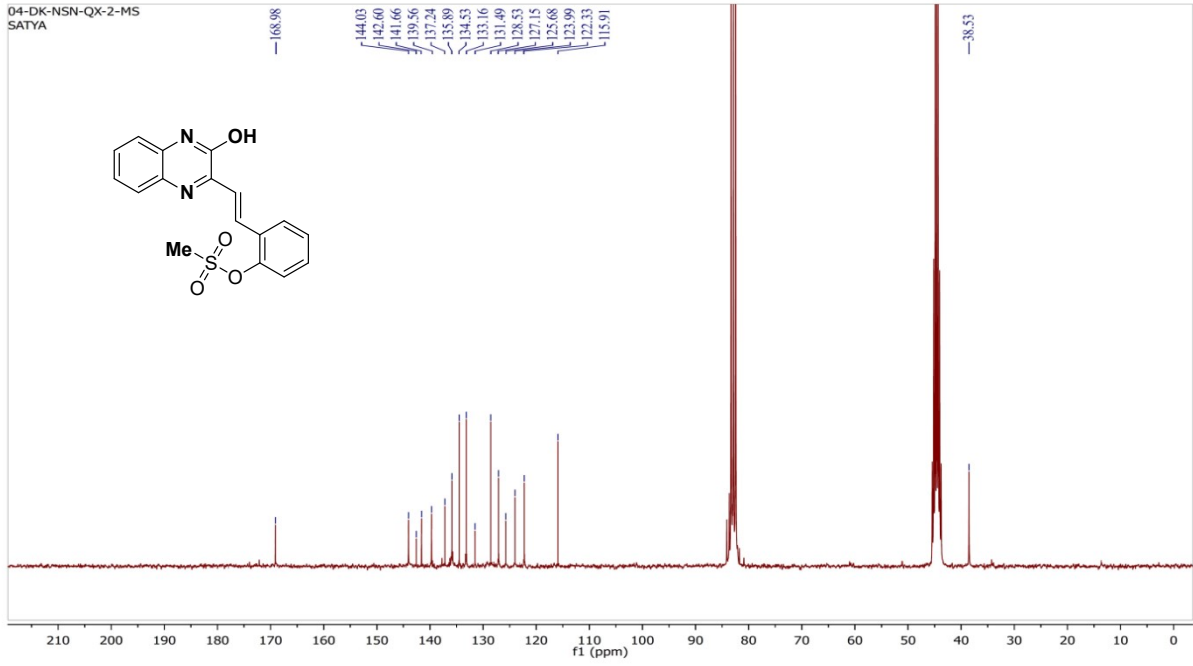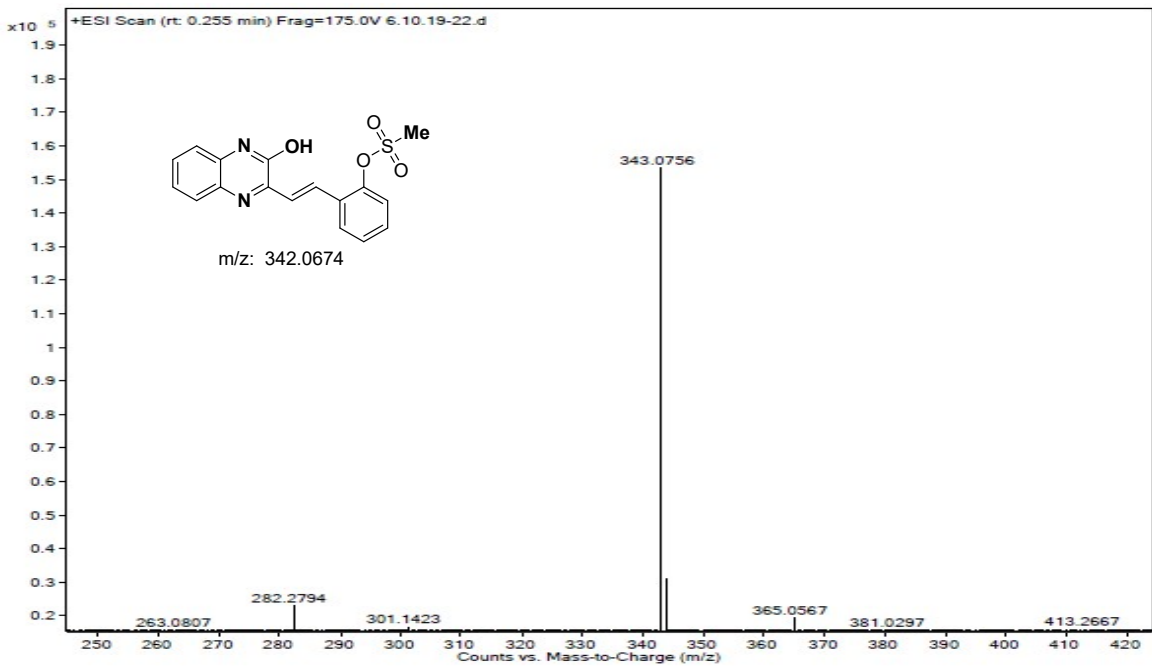

**3-(2-(3-Hydroxyquinoxalin-2-yl)vinyl)phenyl methanesulfonate (5b):**

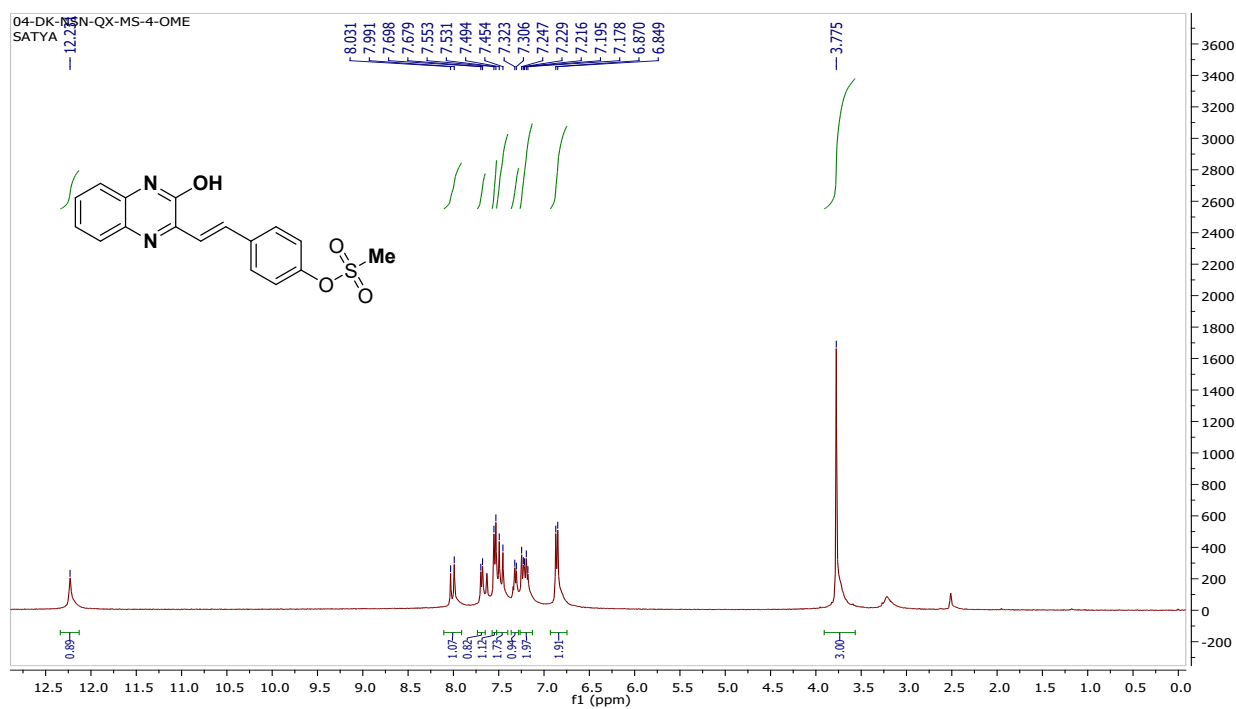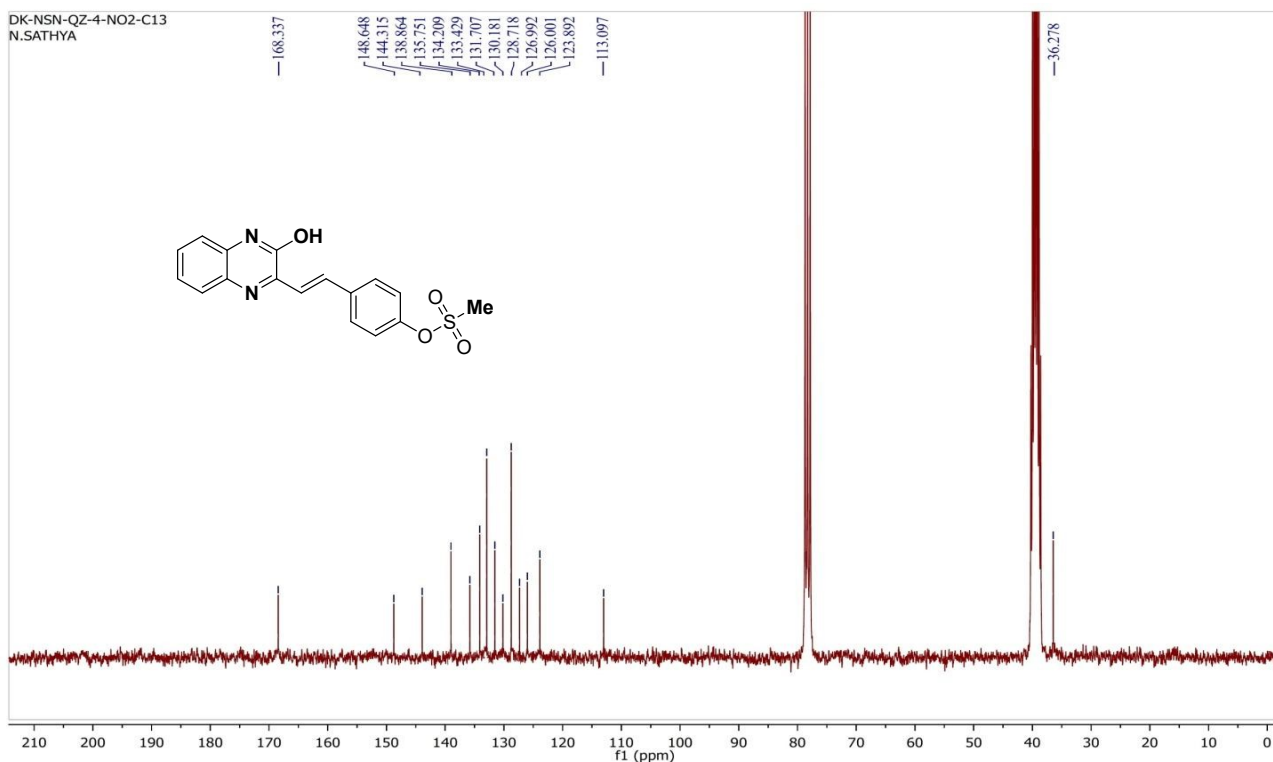

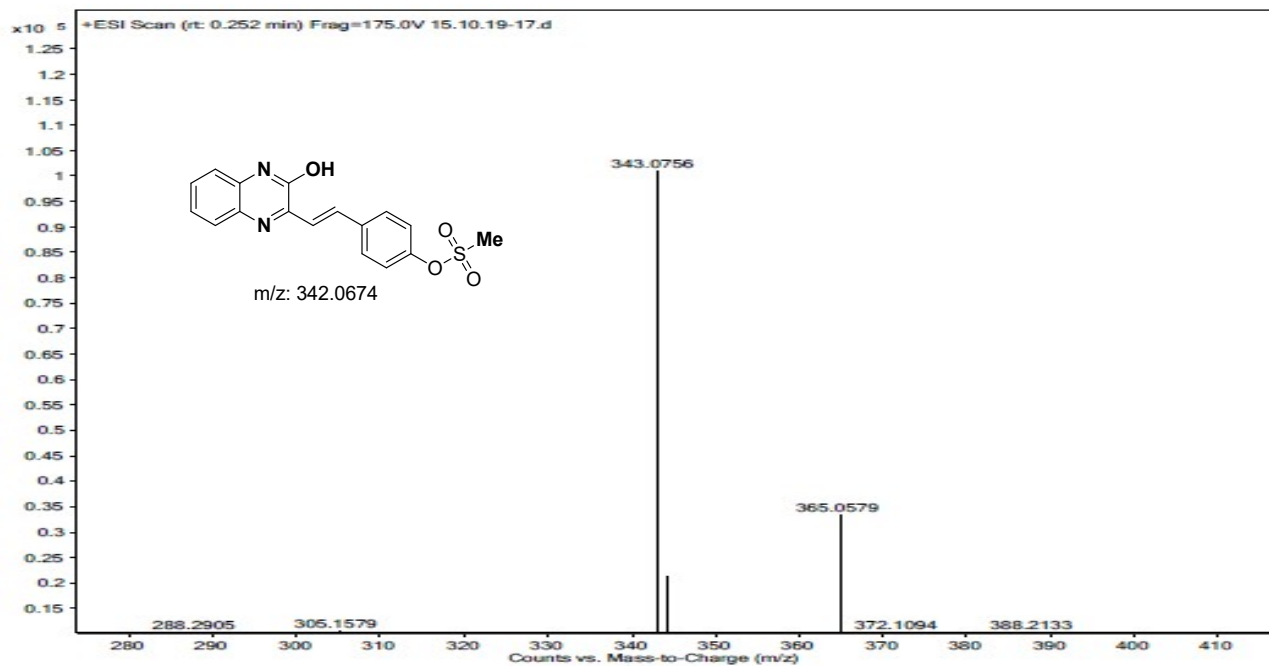

**2-(2-(3-Hydroxyquinoxalin-2-yl)vinyl)phenyl benzenesulfonate (5c):**

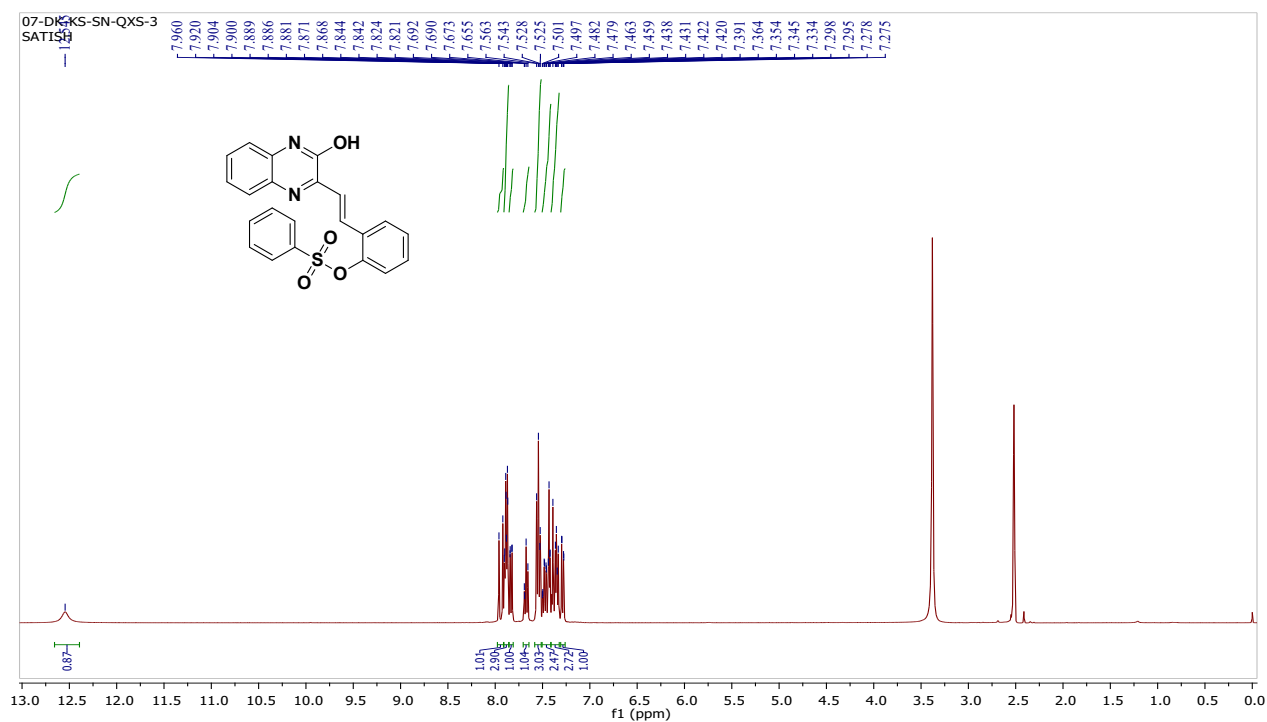

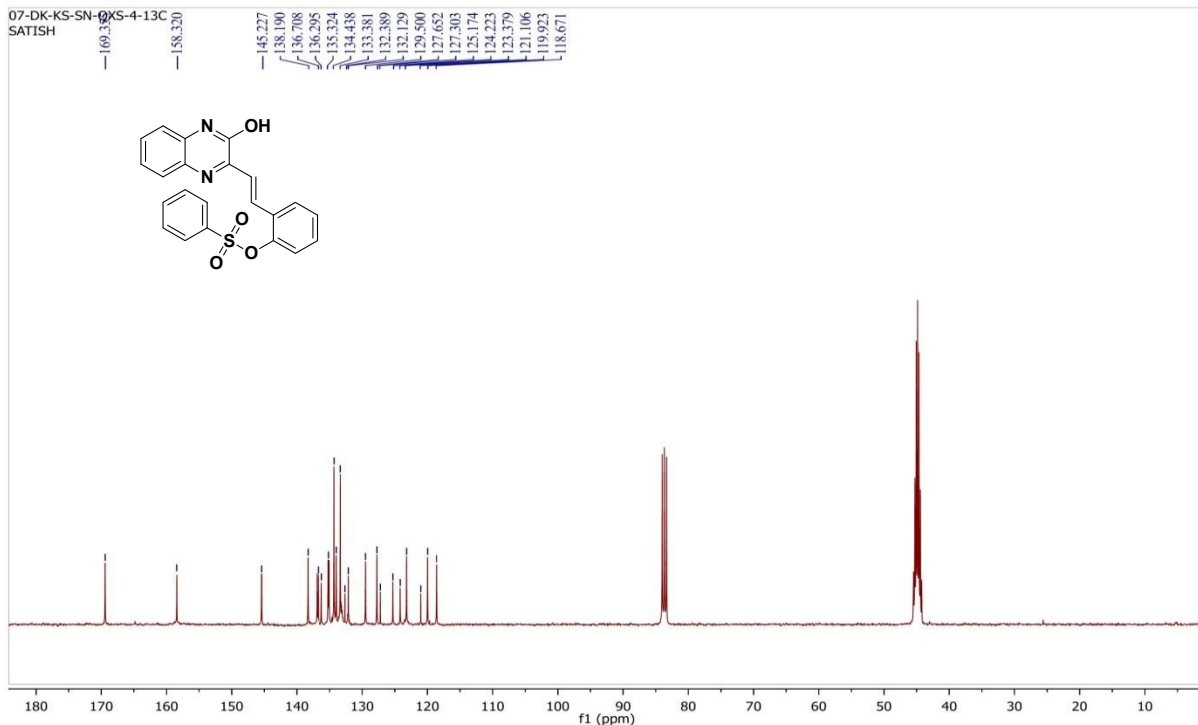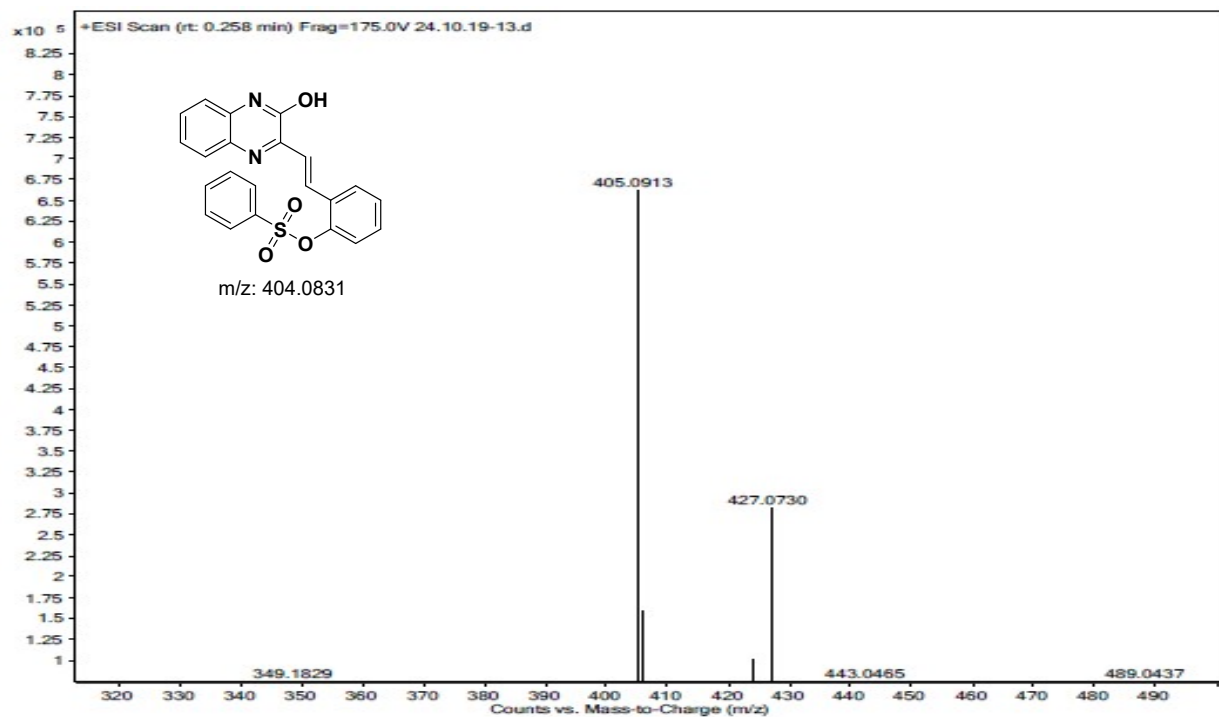

**3-(2-(3-Hydroxyquinoxalin-2-yl)vinyl)phenyl benzenesulfonate (5d):**

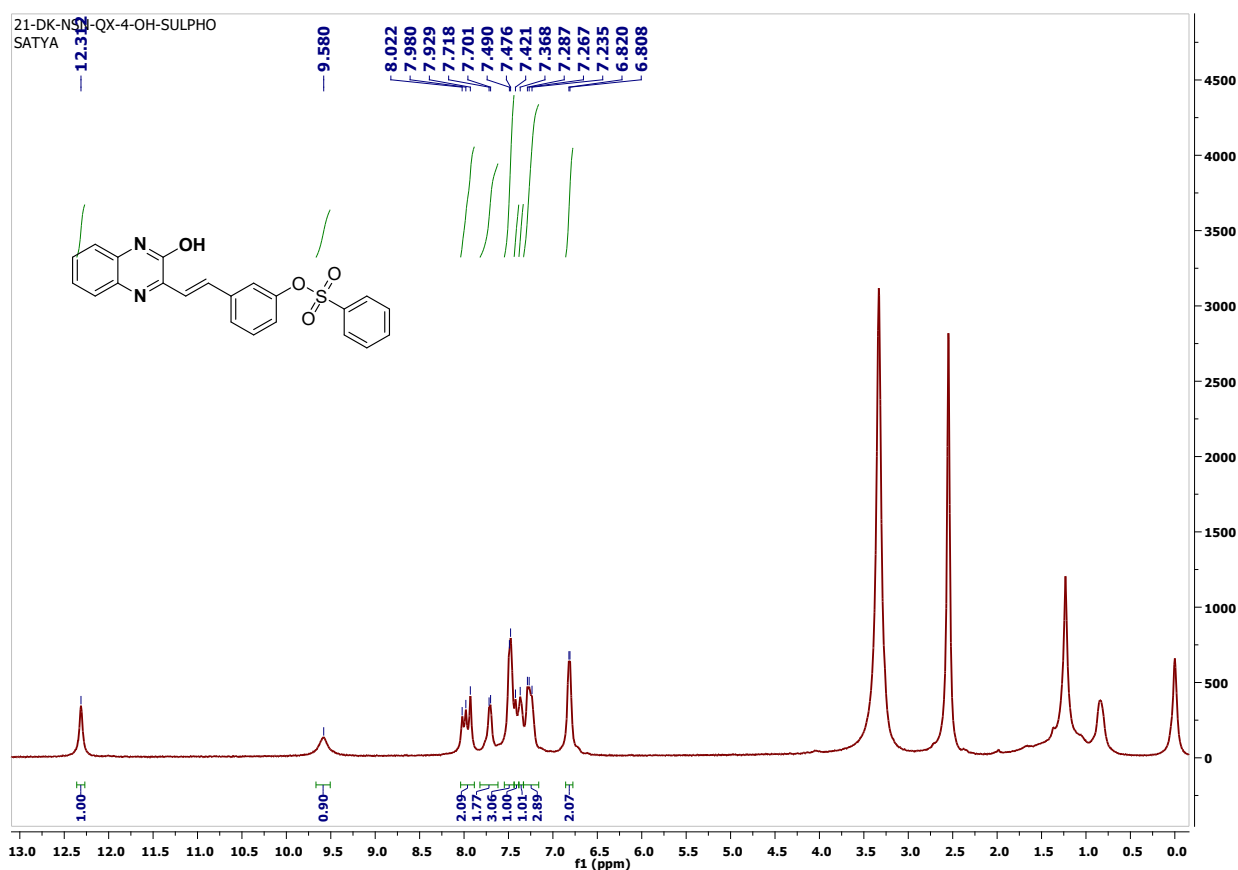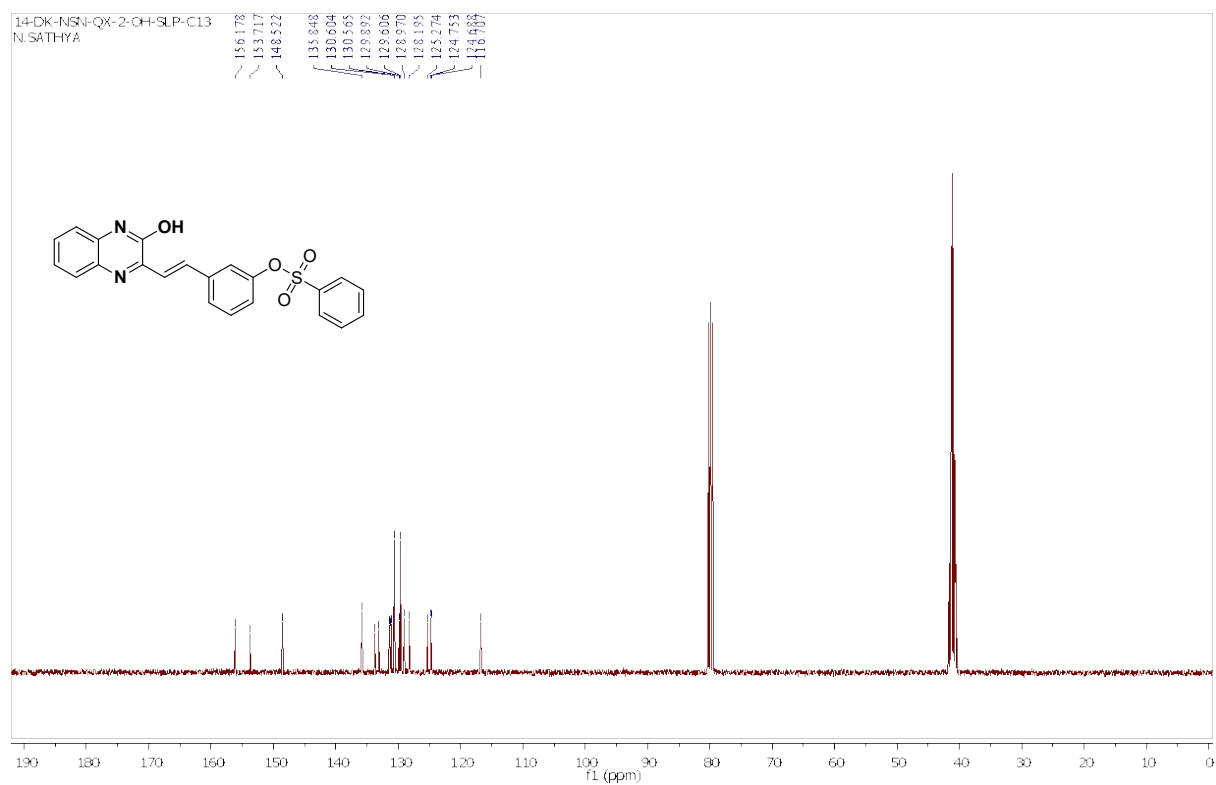

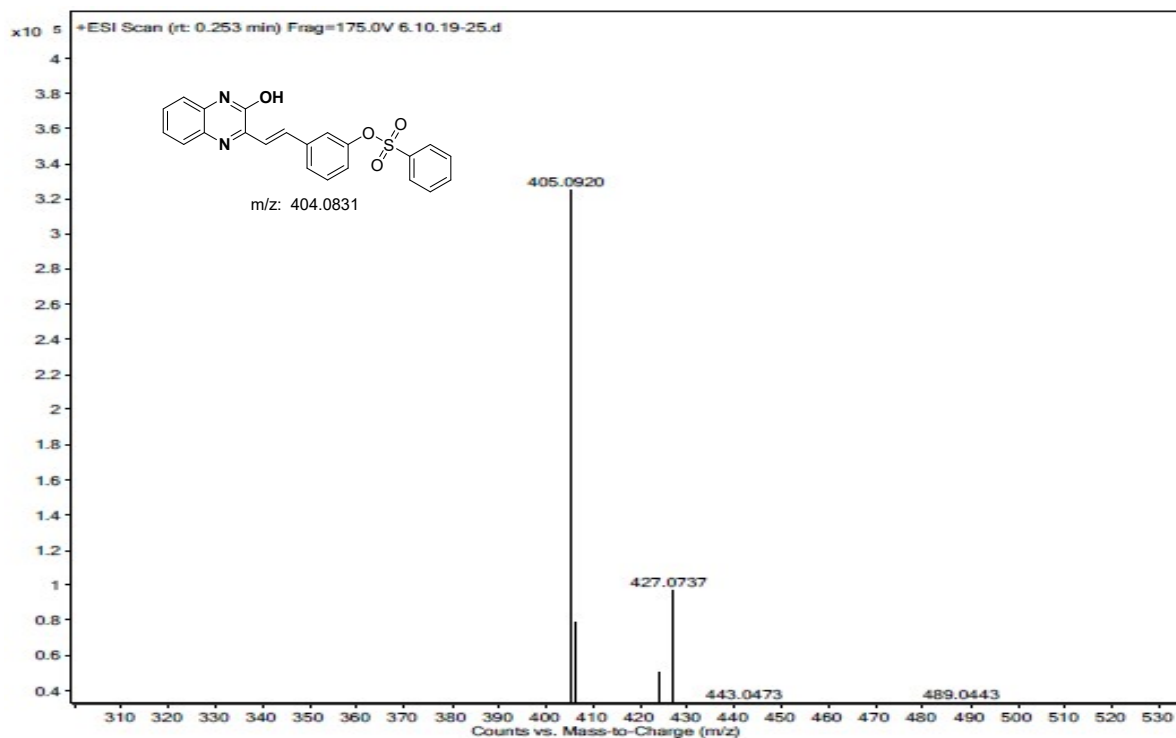

**3-(2-(3-Hydroxyquinoxalin-2-yl)vinyl)phenyl benzenesulfonate (5e):**

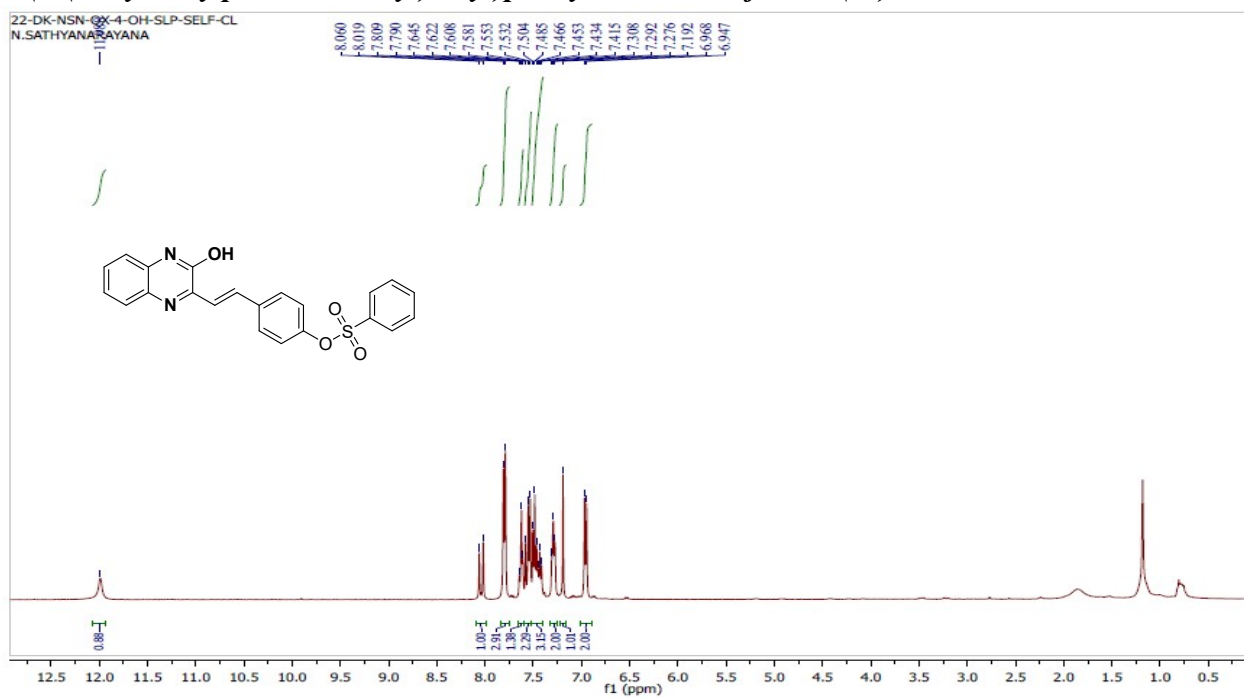



03-DK-NSN-QX-4H-SLP  
SATYA

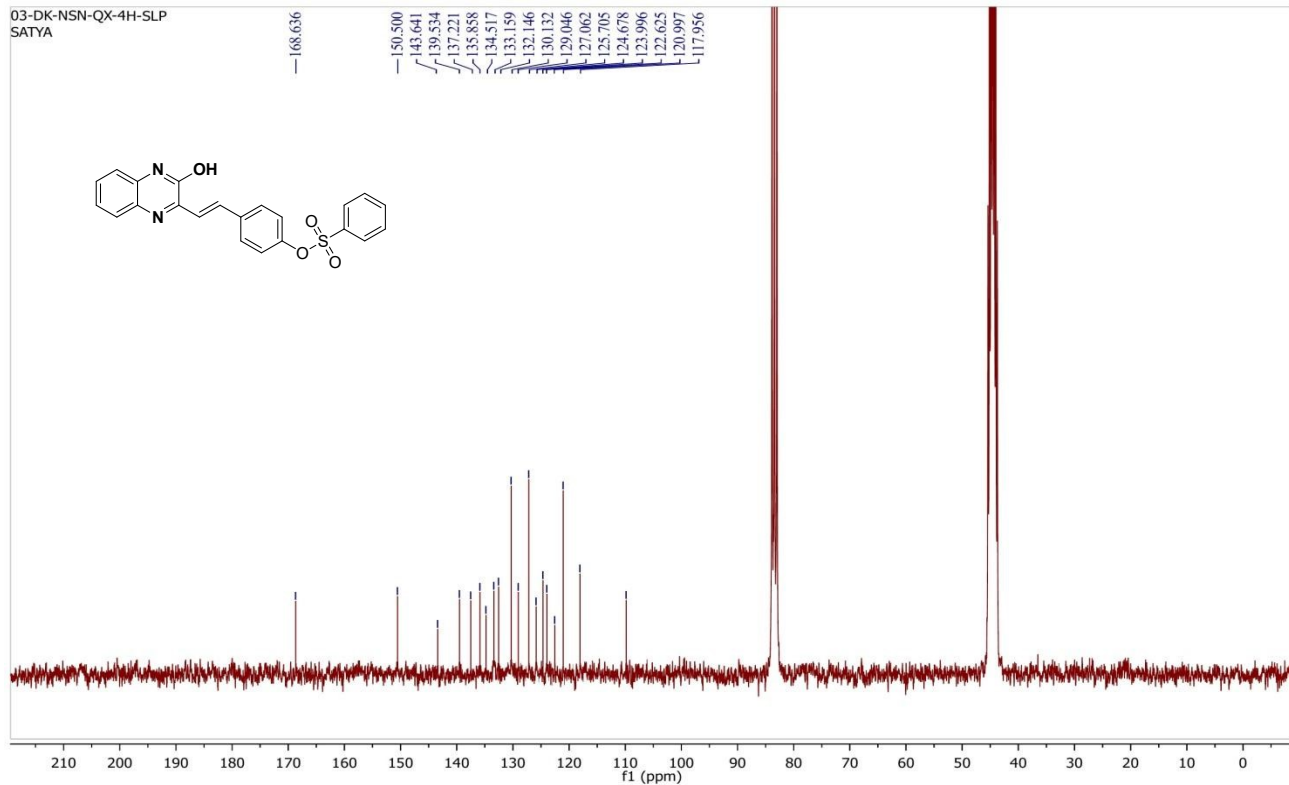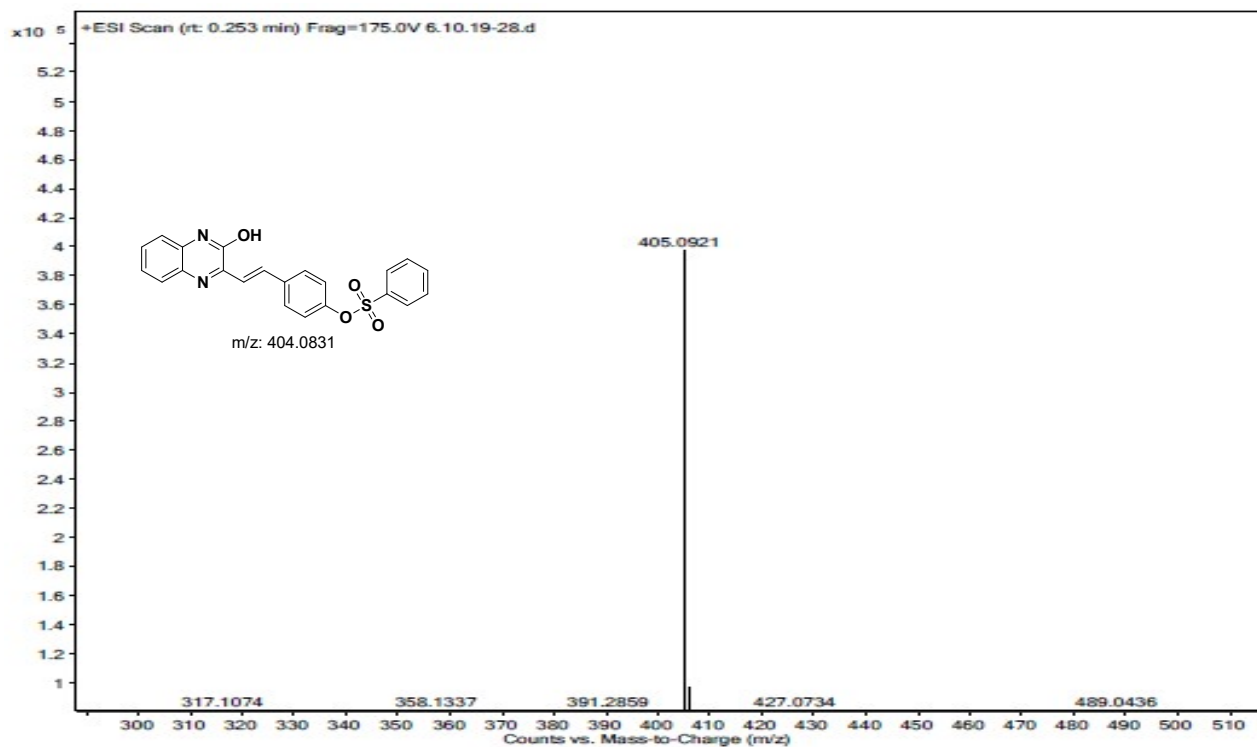

**2-(2-(3-Hydroxyquinoxalin-2-yl)vinyl)phenyl-4-methylbenzenesulfonate (5f):**

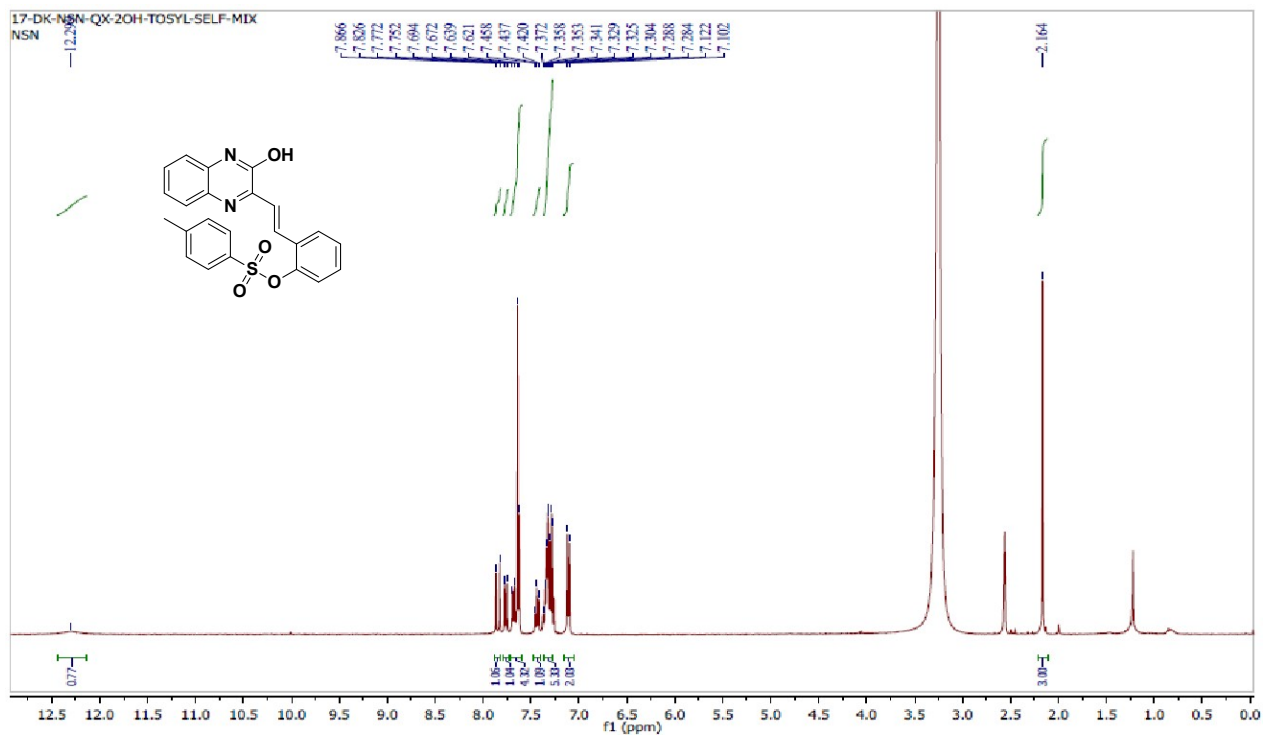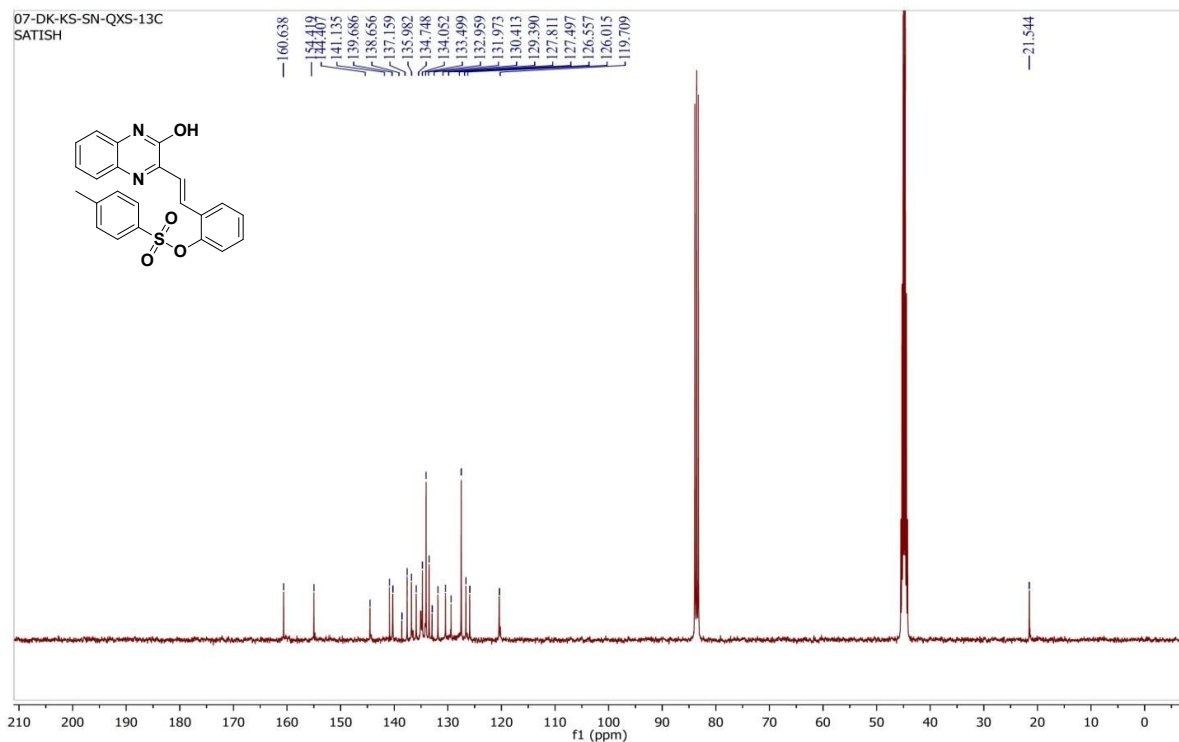

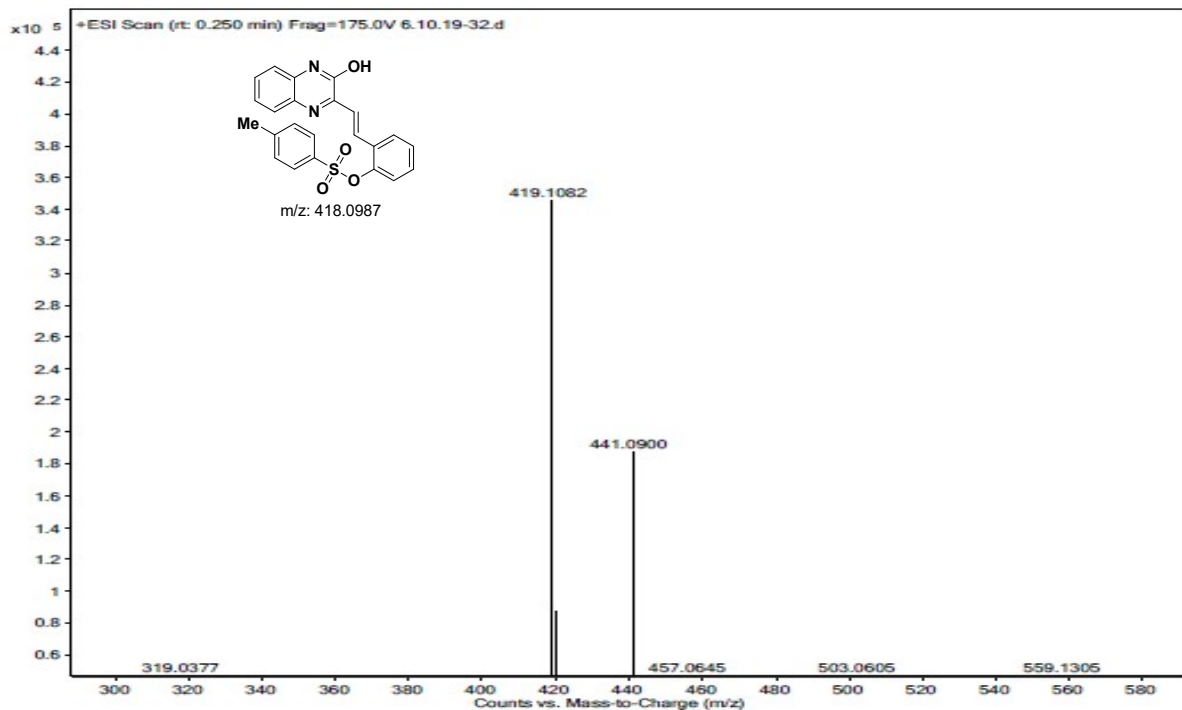

**4-(2-(3-Hydroxyquinoxalin-2-yl)vinyl)phenyl-4-methylbenzenesulfonate (5g):**

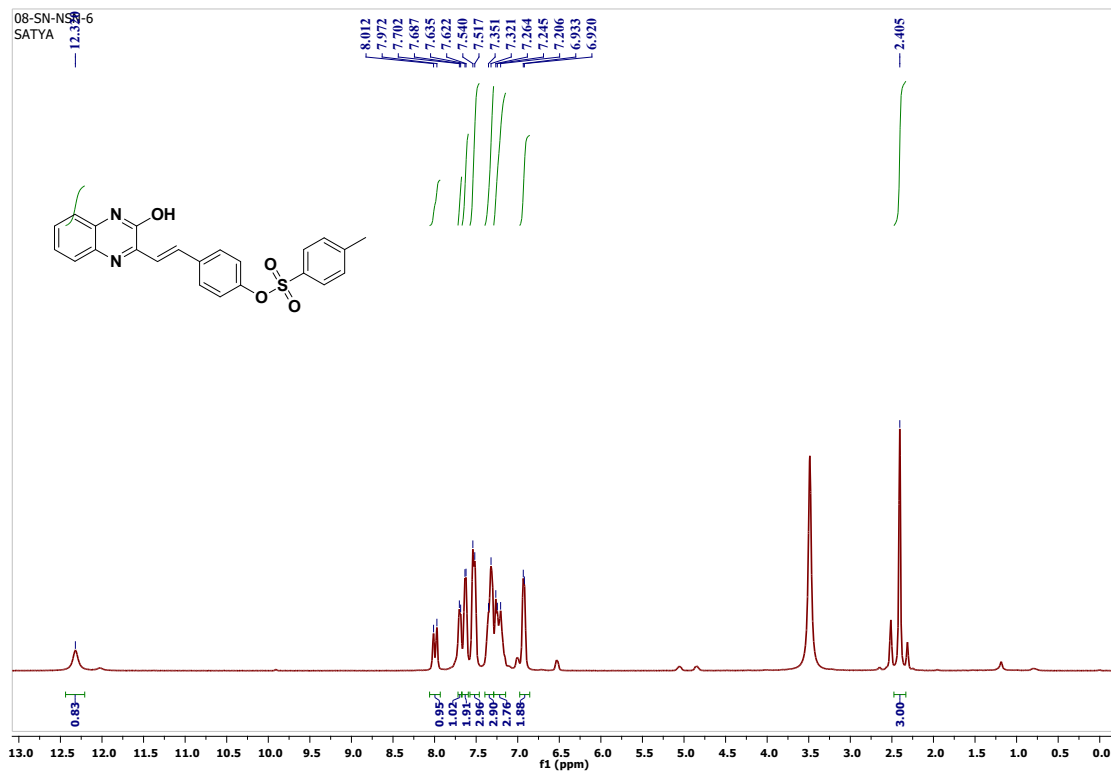

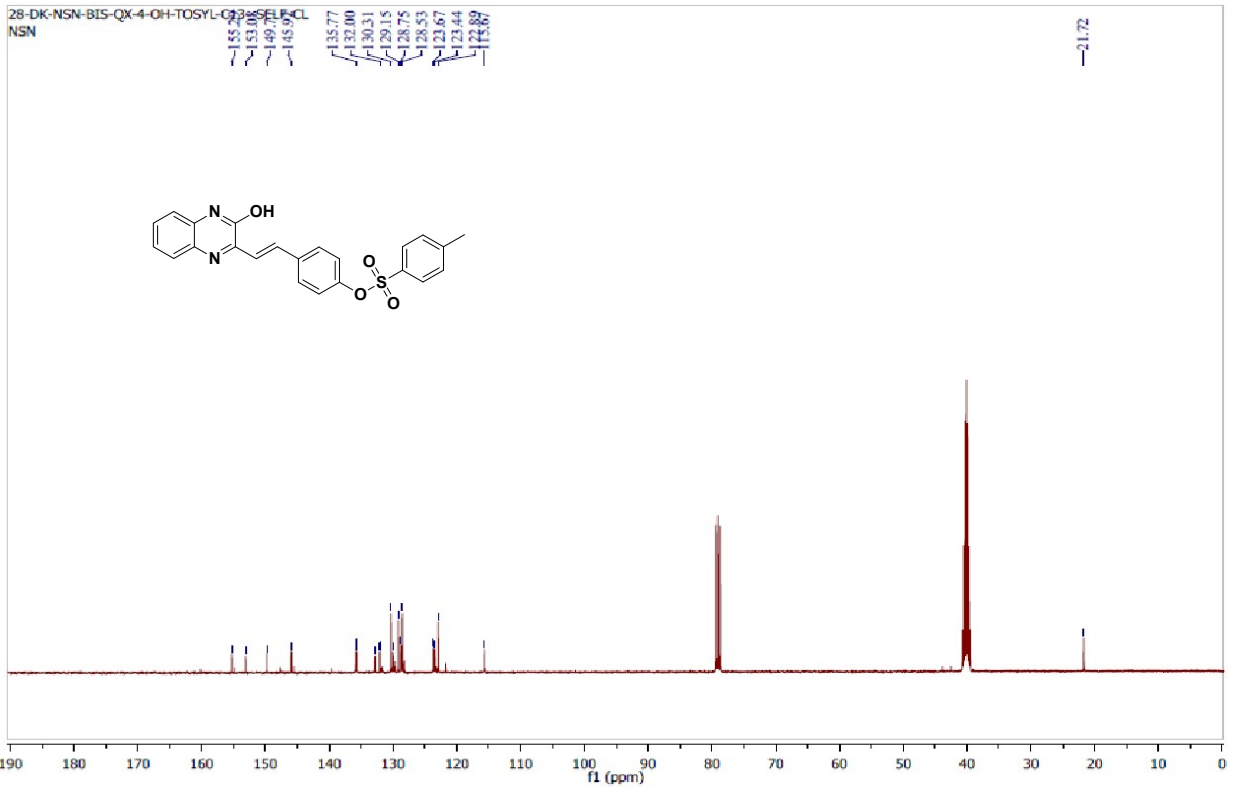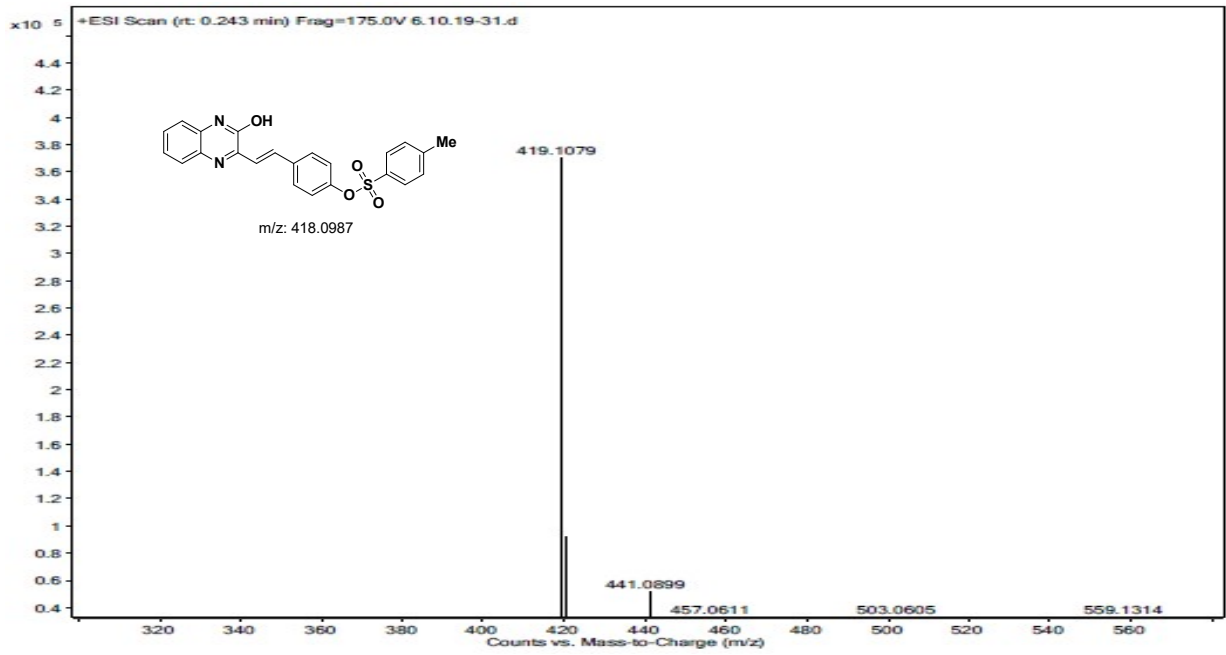

**2-(2-(3-Hydroxyquinoxalin-2-yl)vinyl)-6-methoxyphenyl methanesulfonate (5h):**

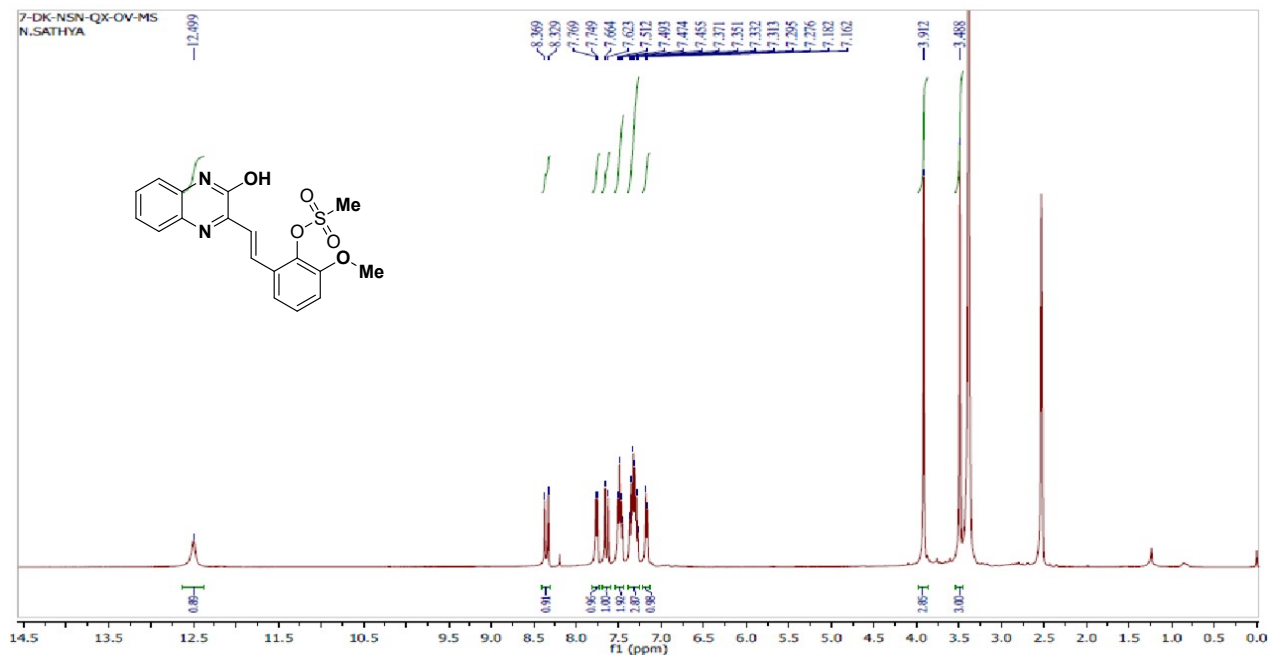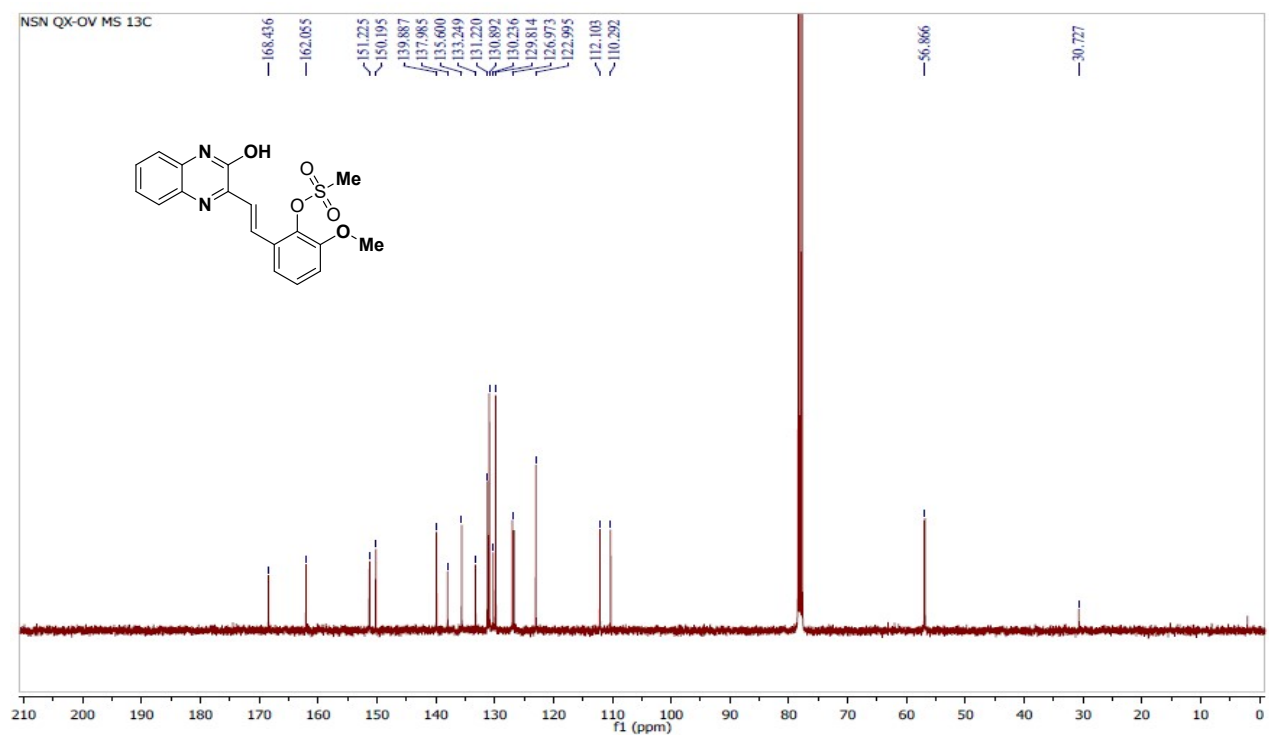

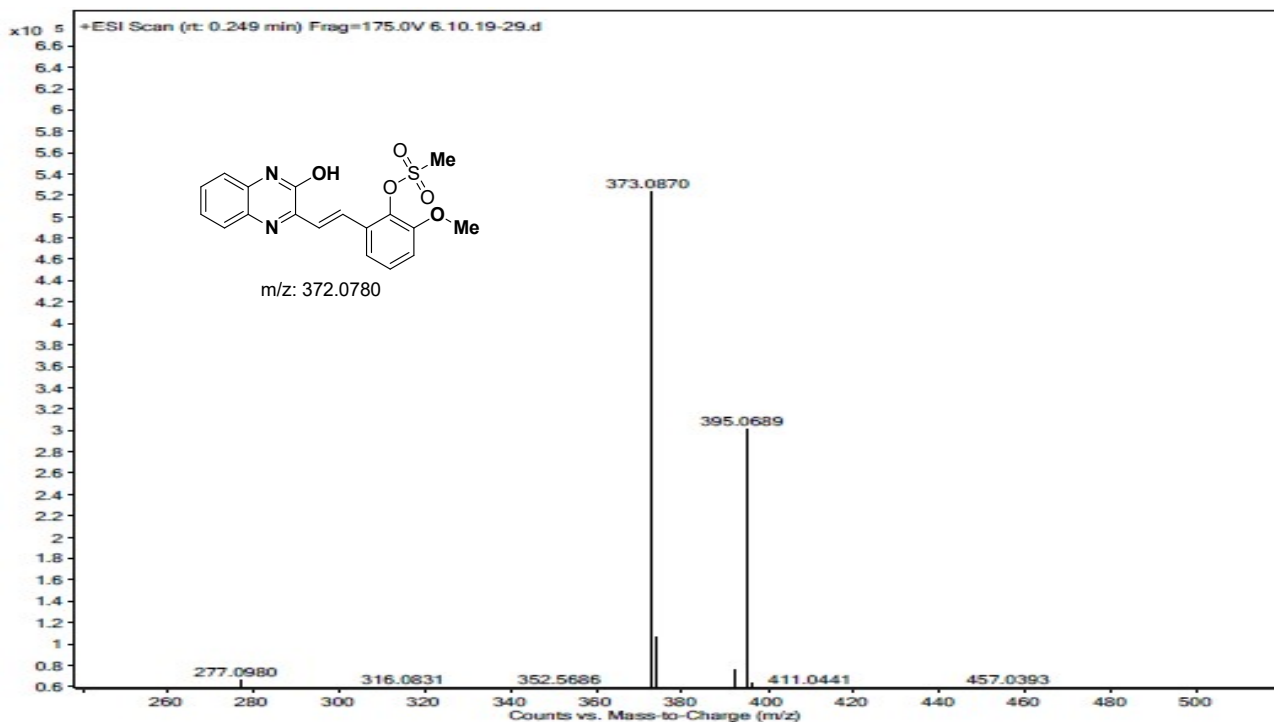

**5-(2-(3-Hydroxyquinoxalin-2-yl)vinyl)-2-methoxyphenyl methanesulfonate (5i):**

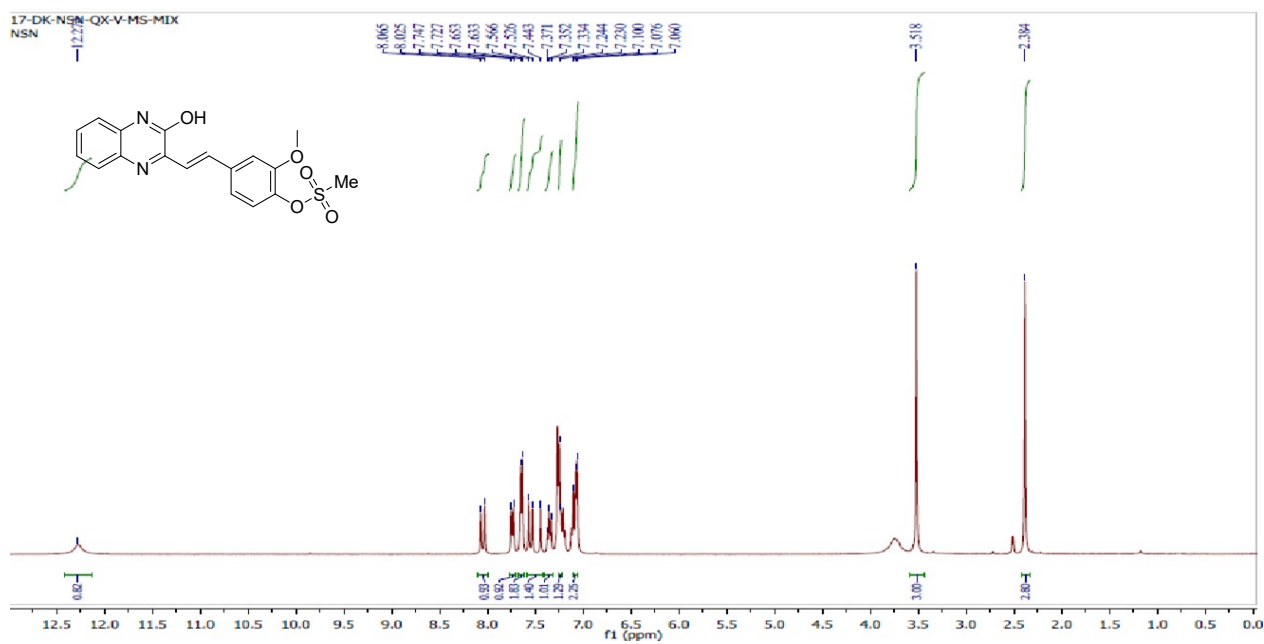

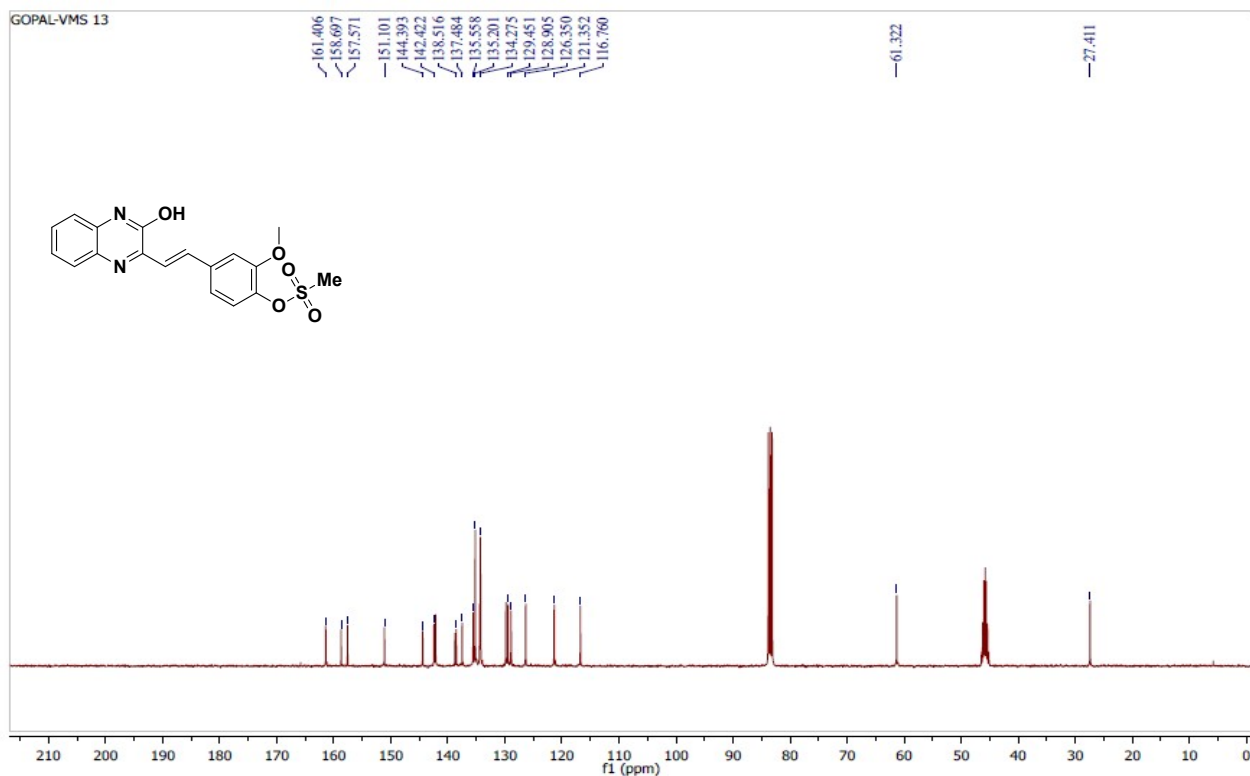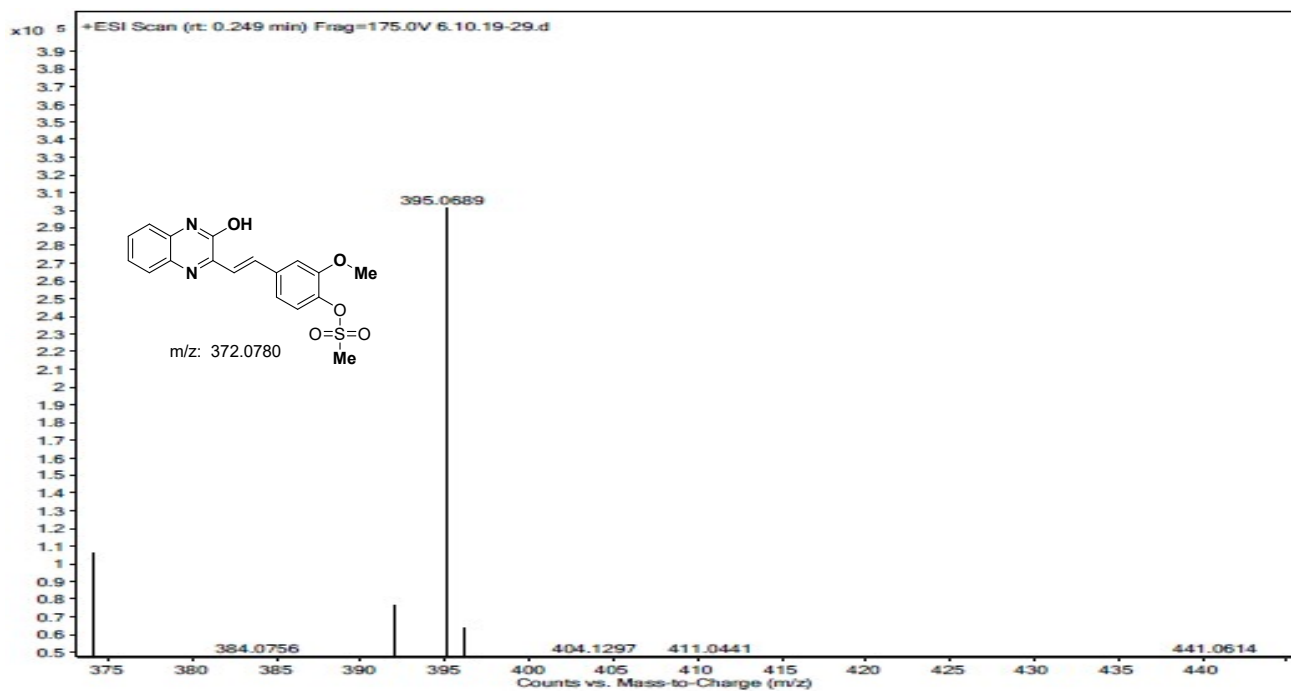

**2-(2-(3-Hydroxyquinoxalin-2-yl)vinyl)phenyl benzenesulfonate (5j):**

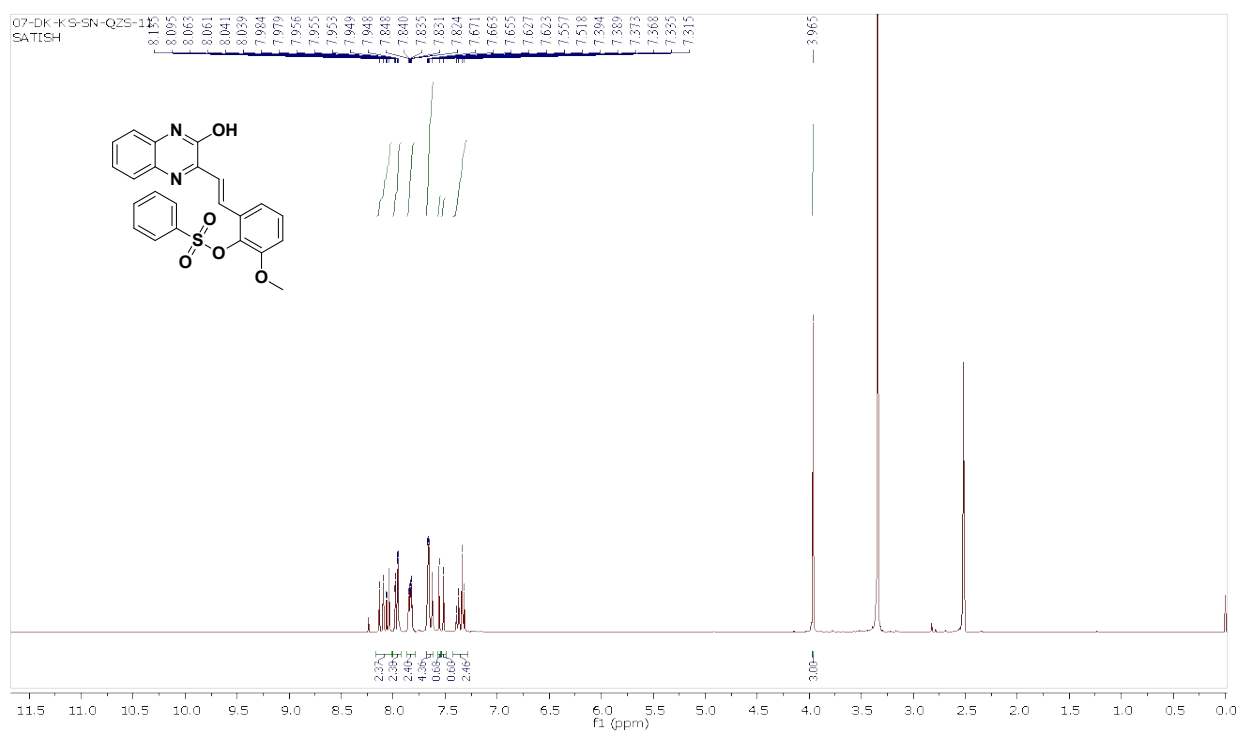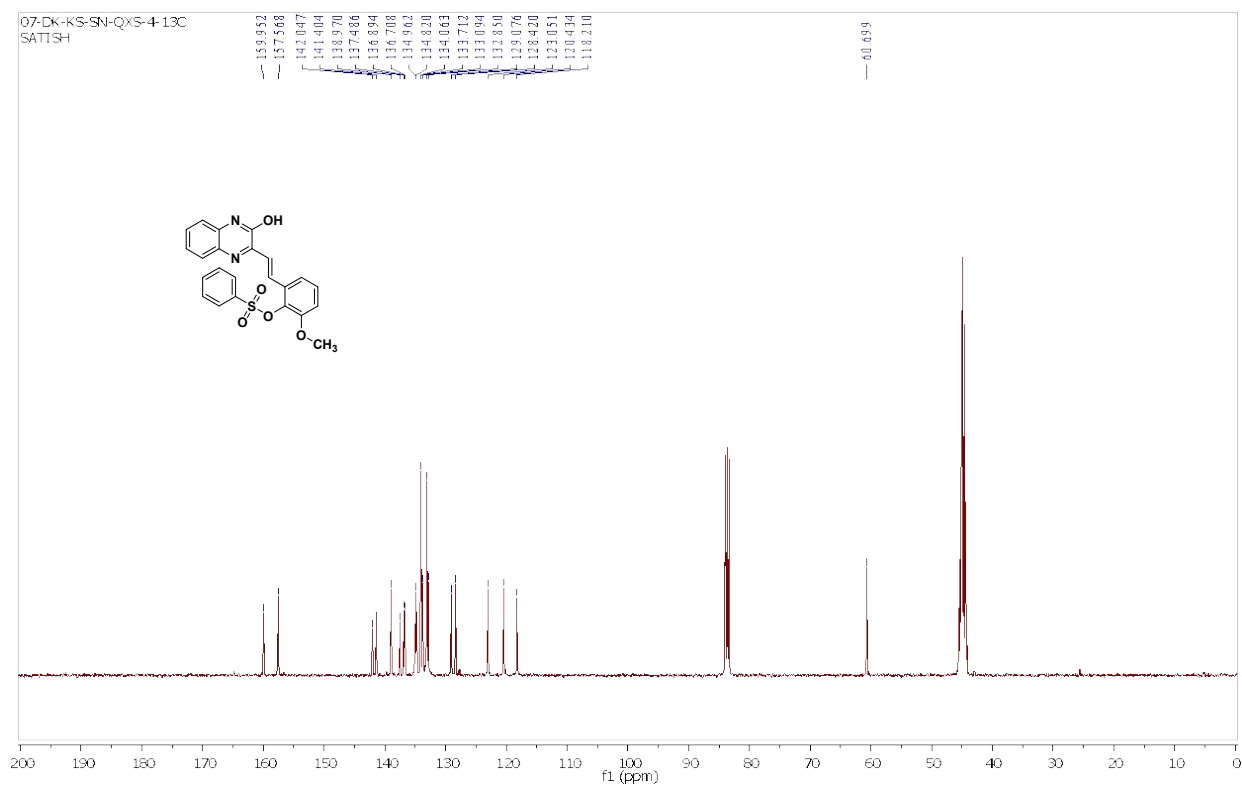



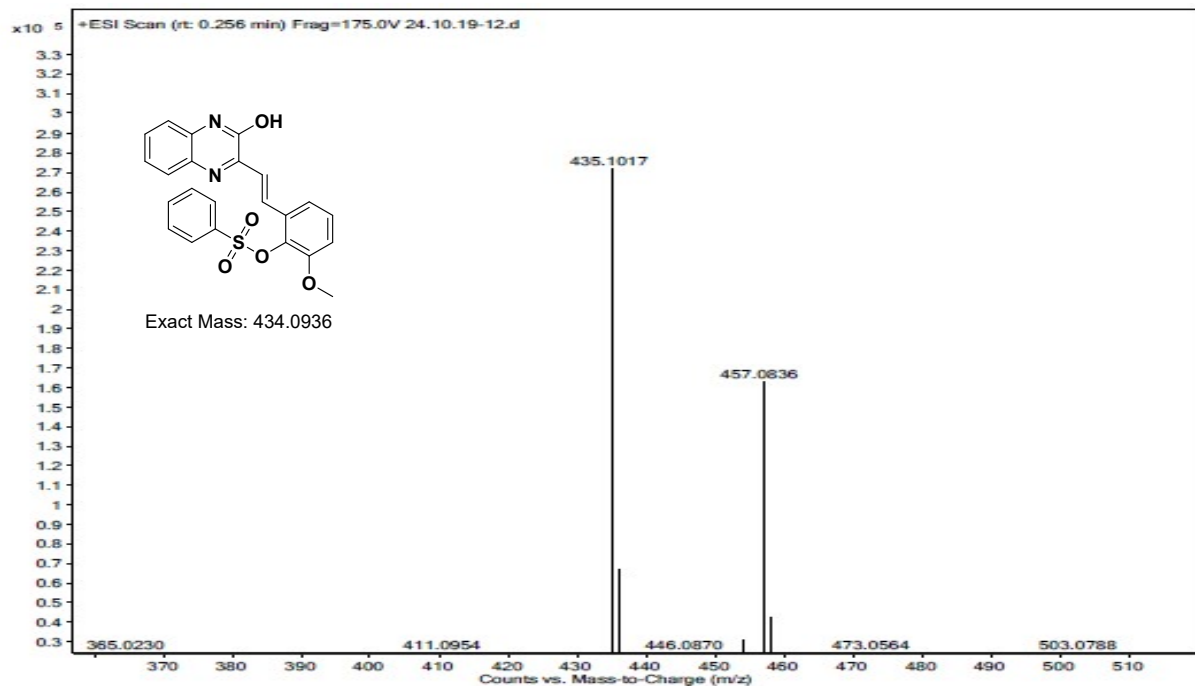

**2-(2-(3-Hydroxyquinoxalin-2-yl)vinyl)-6-methoxyphenyl 4-methylbenzenesulfonate (5k):**

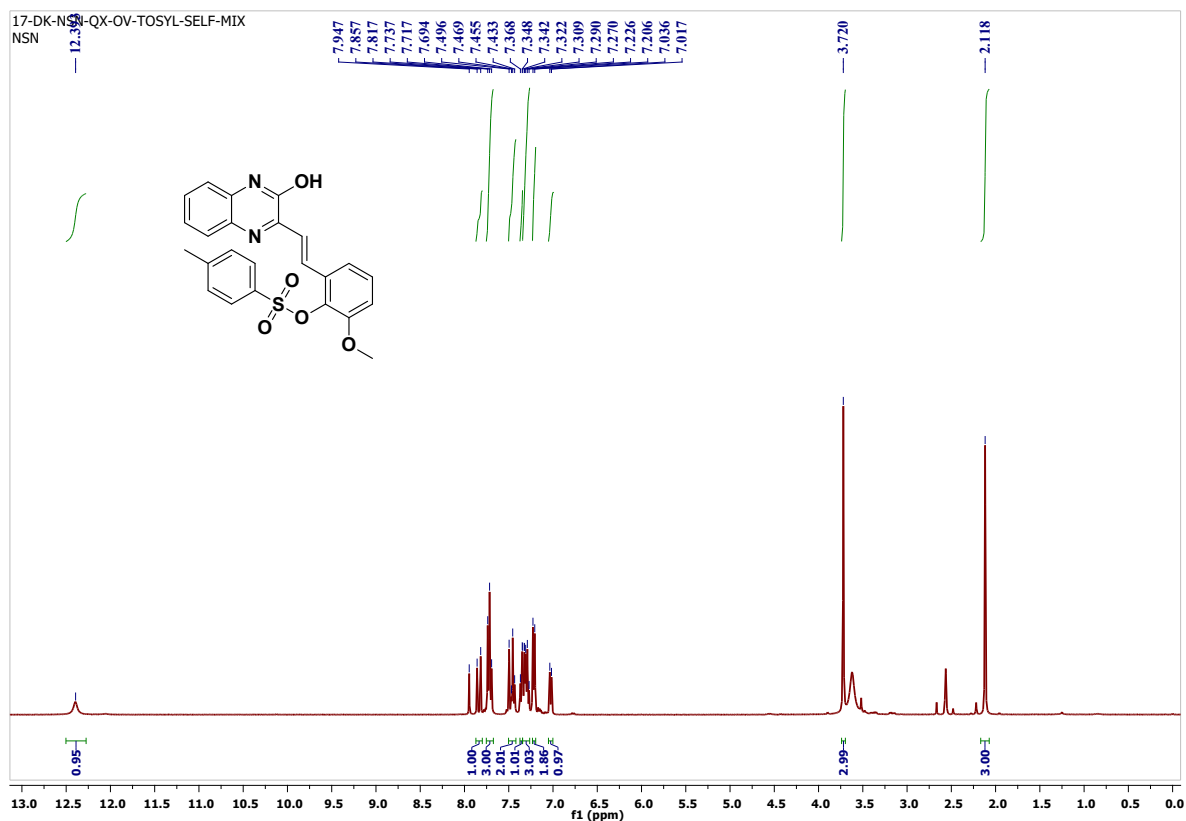

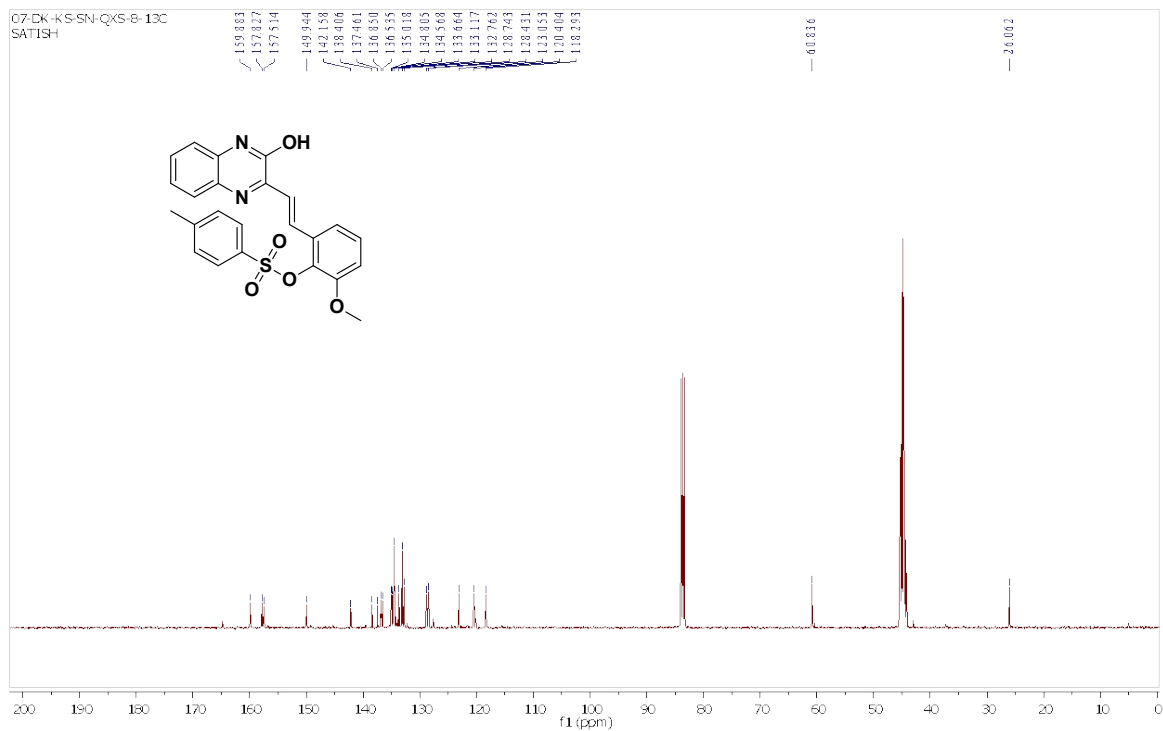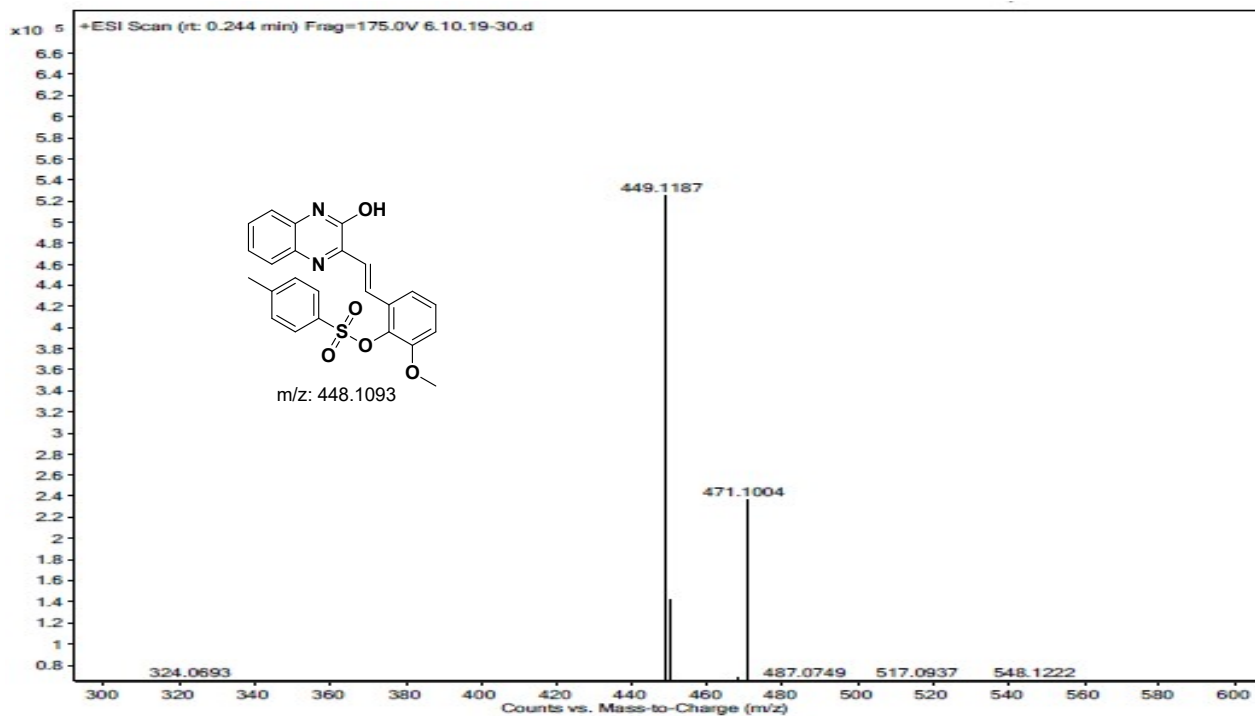

**5-(2-(3-Hydroxyquinoxalin-2-yl)vinyl)-2-methoxyphenyl benzenesulfonate (5l):**

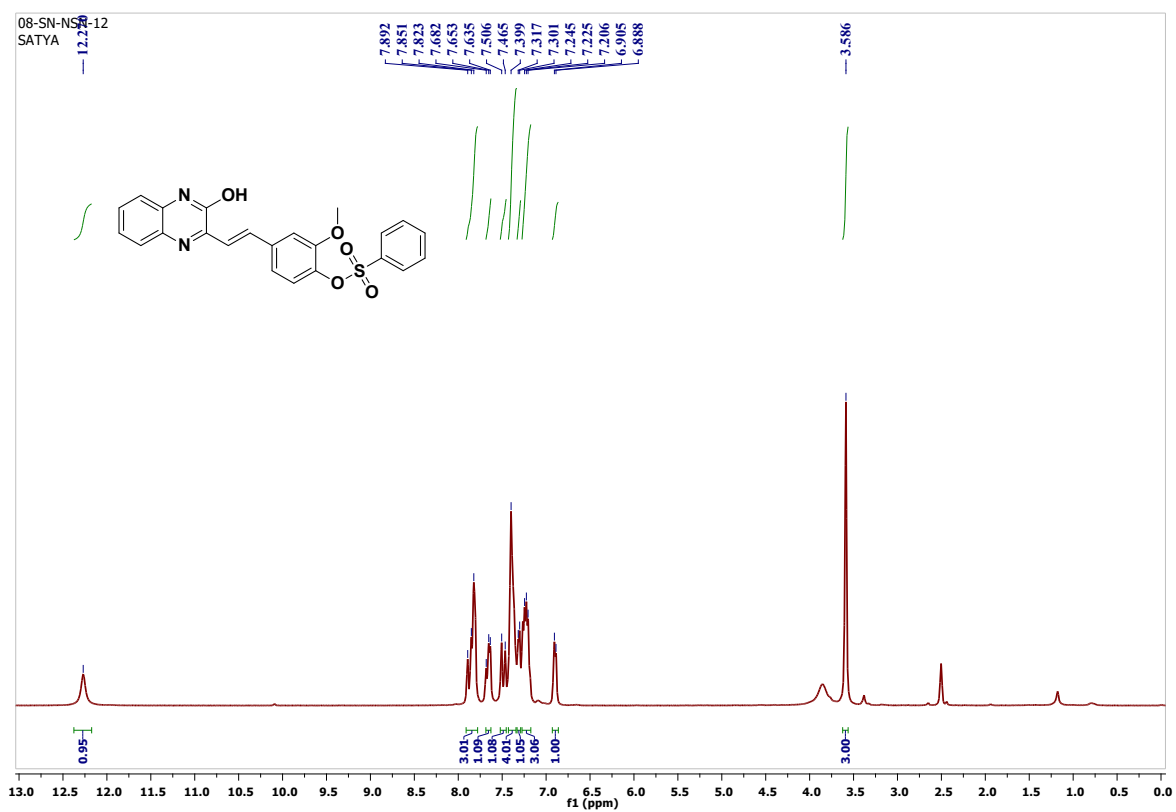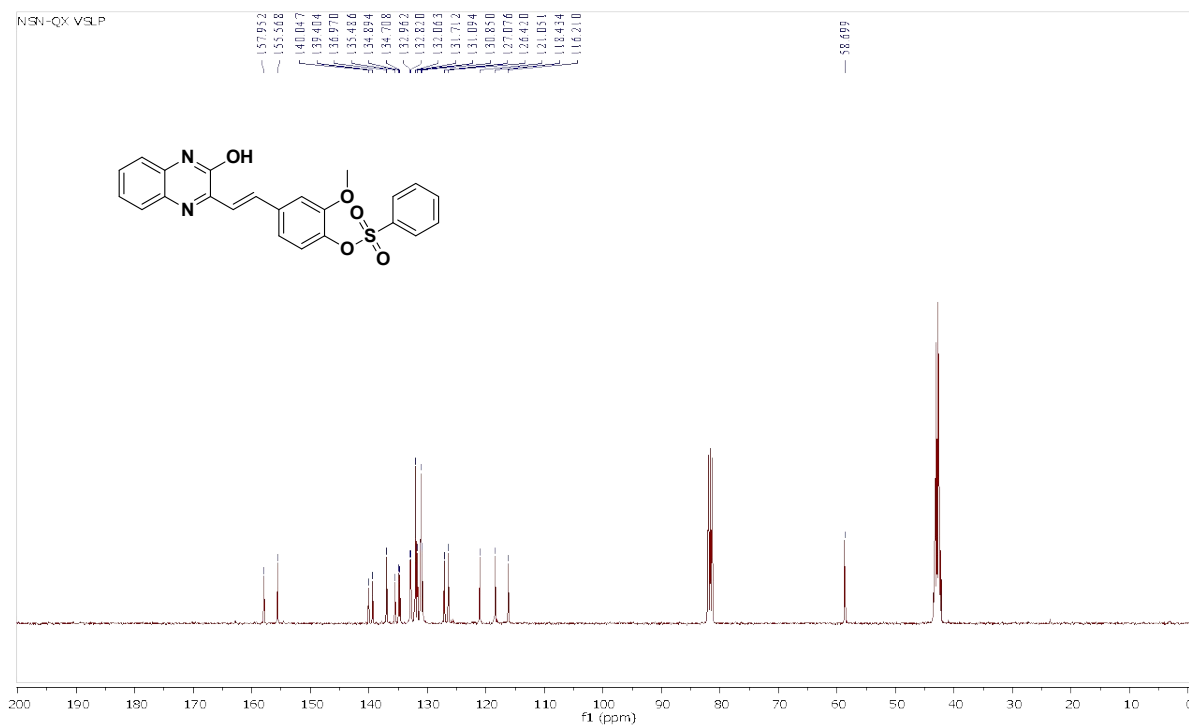

**2-(2-(3-Hydroxyquinoxalin-2-yl)vinyl)phenyl-4-nitrobenzenesulfonate (5m):**

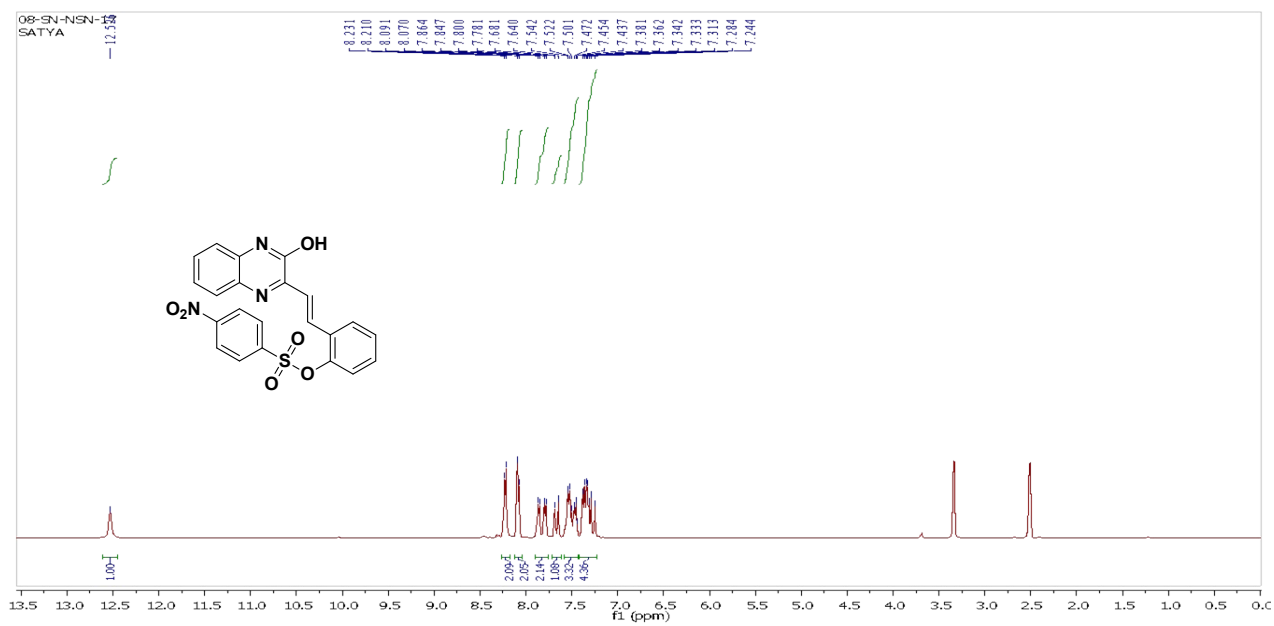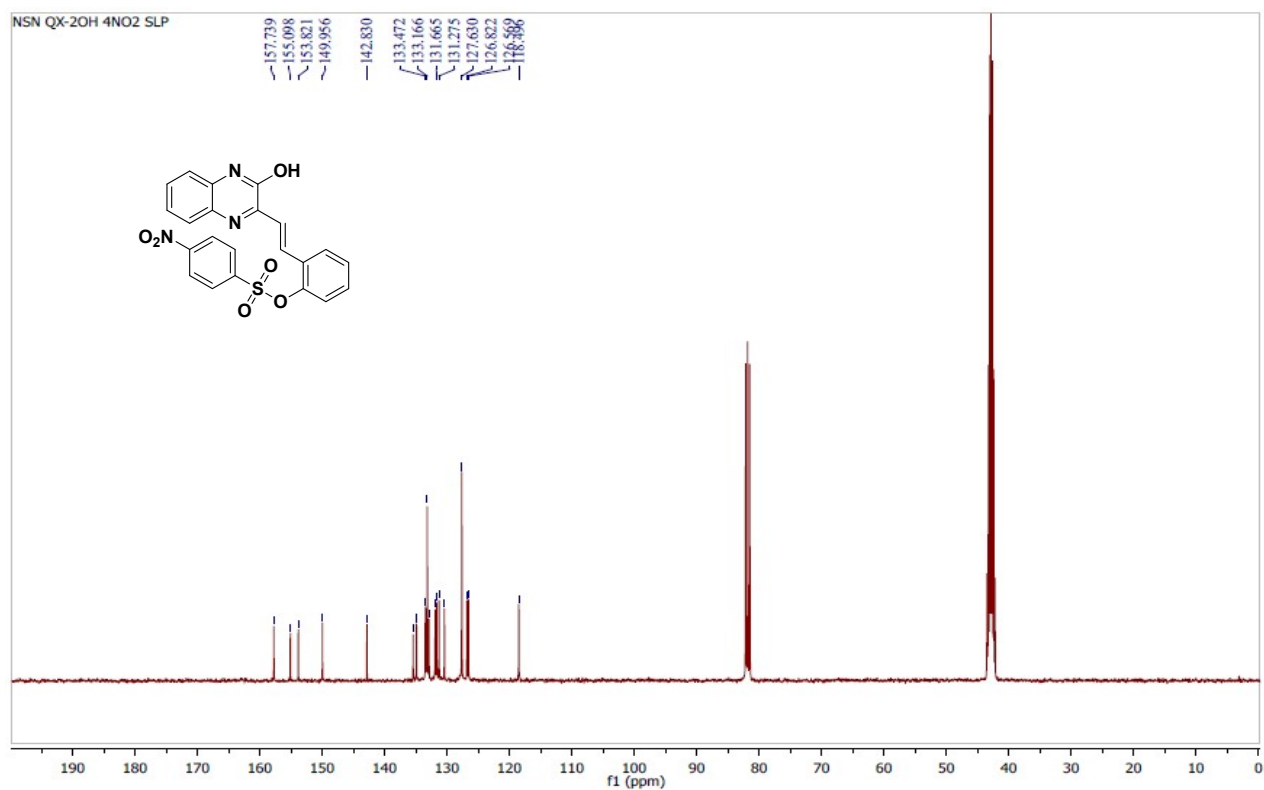

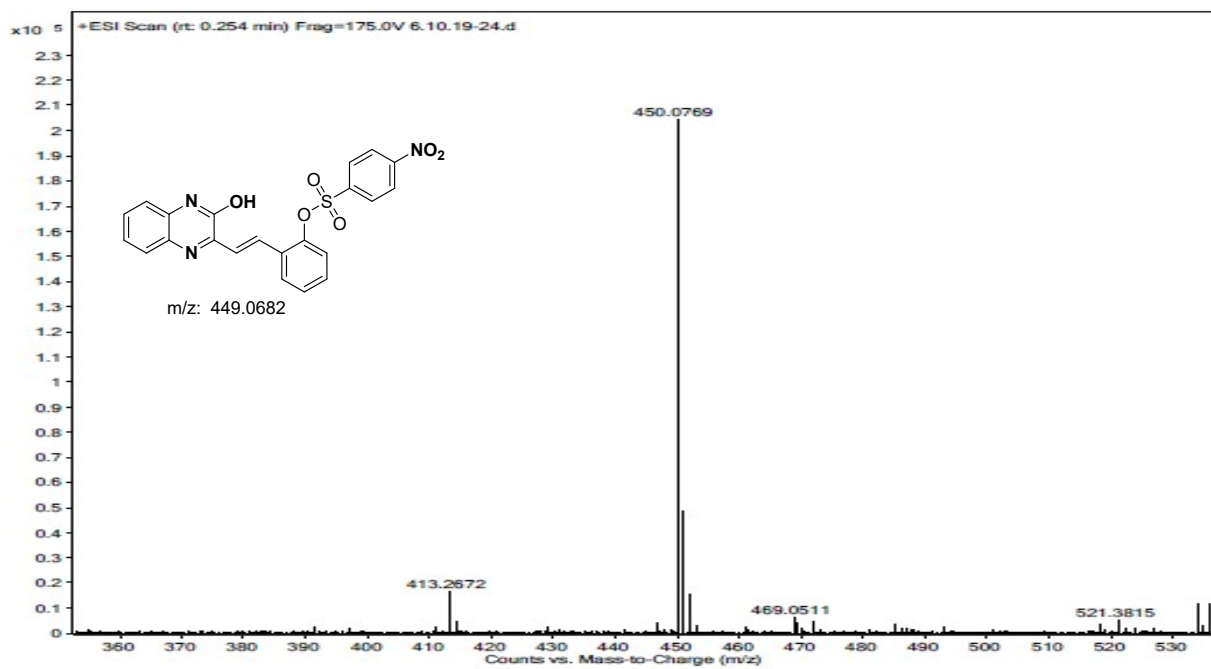

**4-(2-(3-Hydroxyquinoxalin-2-yl)vinyl)phenyl 4-nitrobenzenesulfonate (5n):**

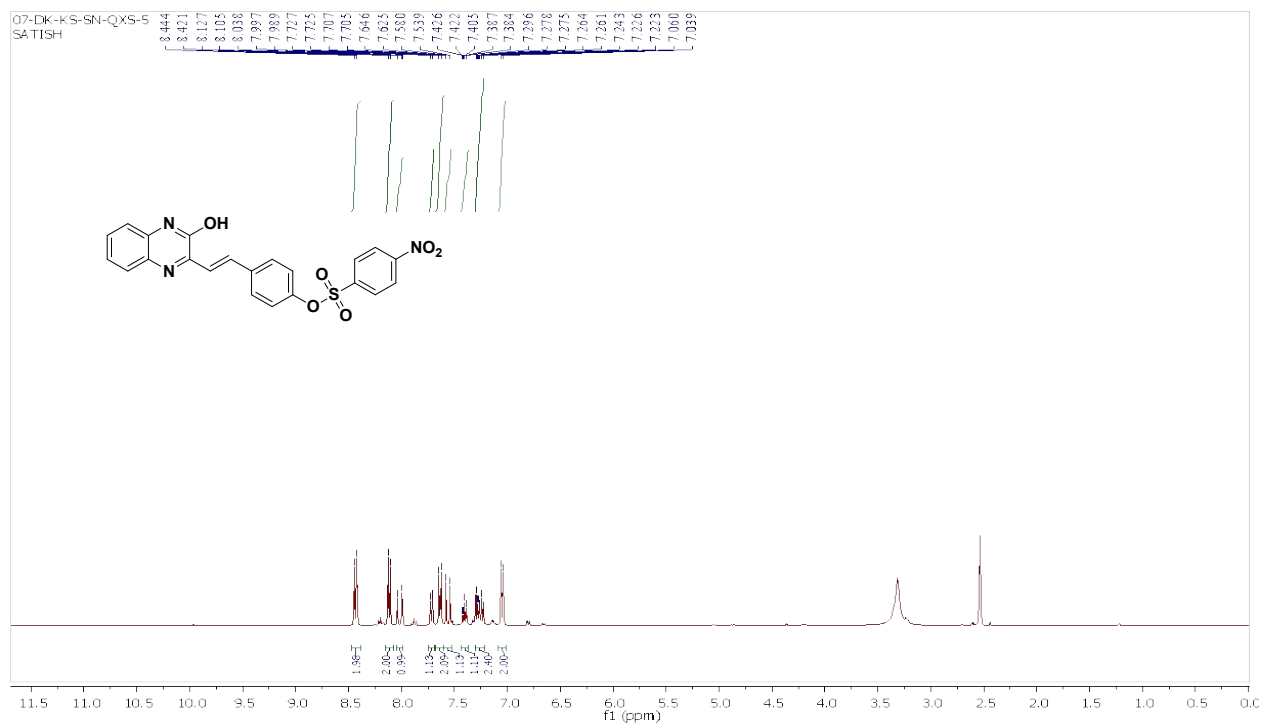

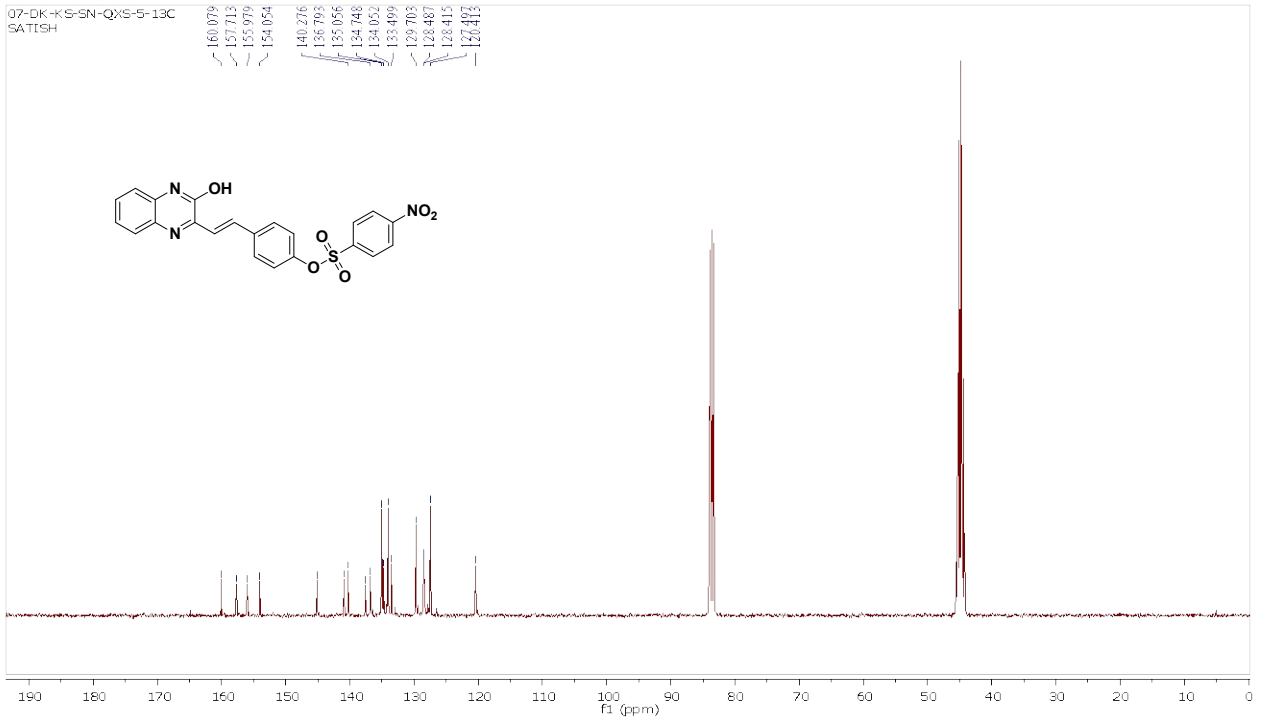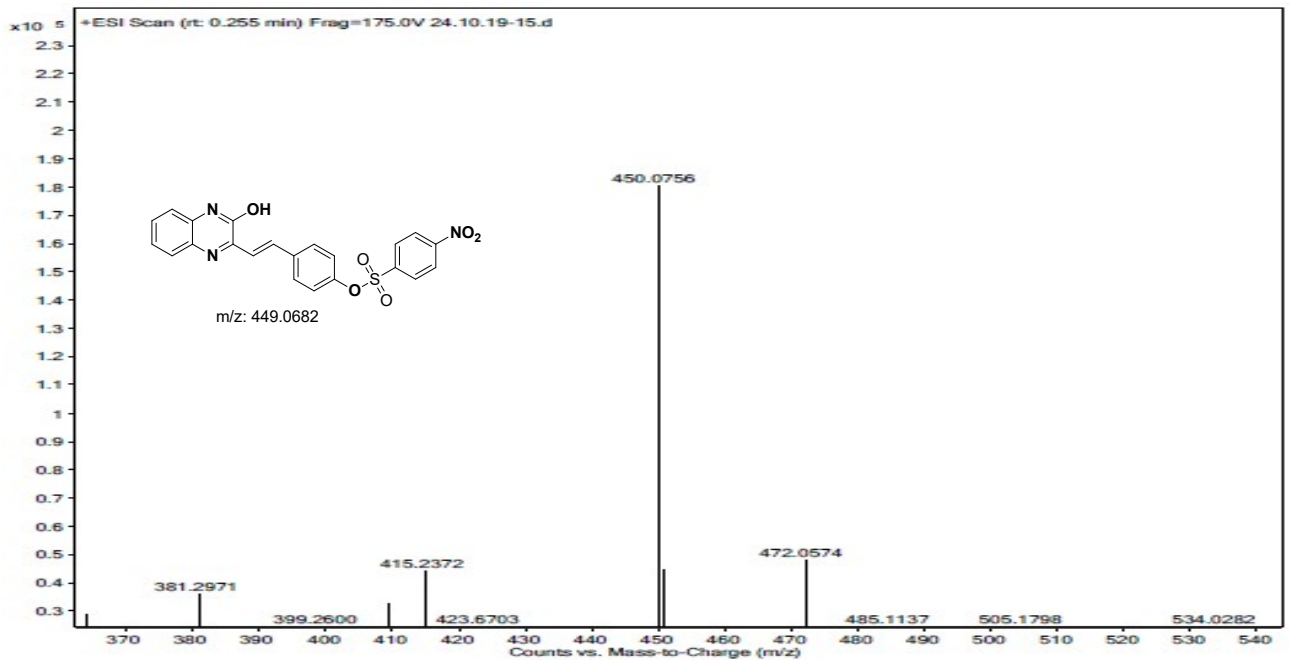

**2-(2-(3-Hydroxyquinoxalin-2-yl)vinyl)-6-methoxyphenyl-4-nitrobenzenesulfonate (5o):**

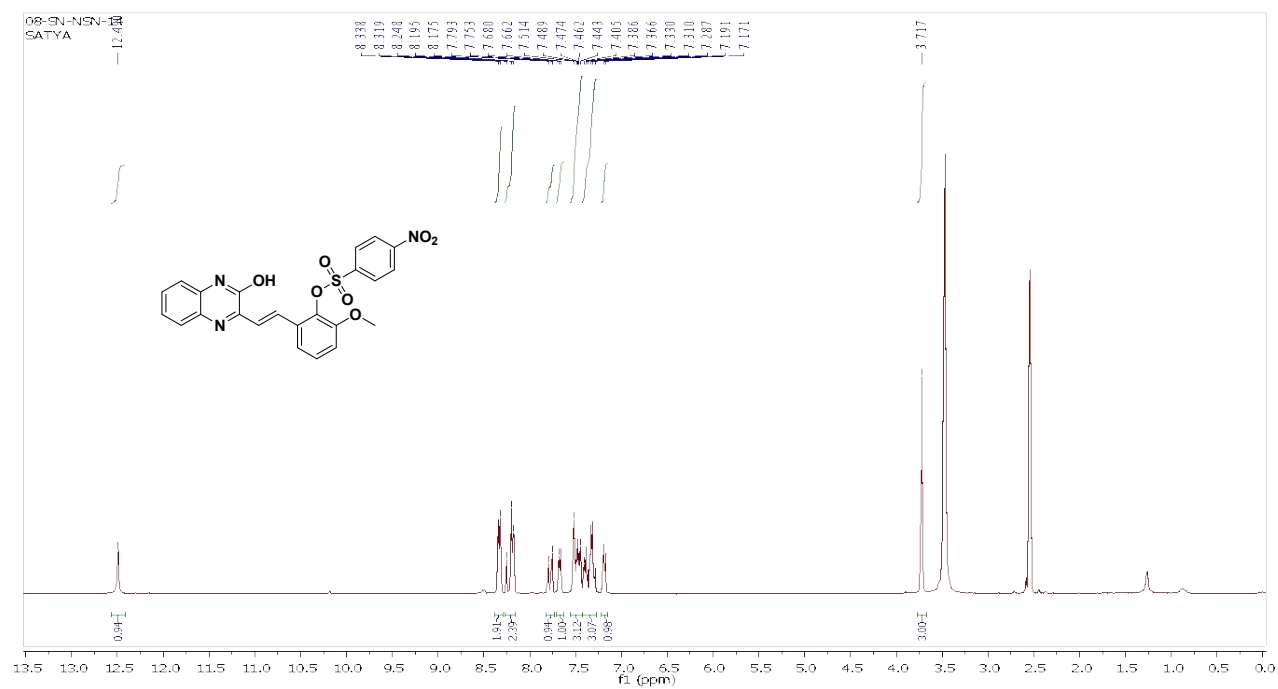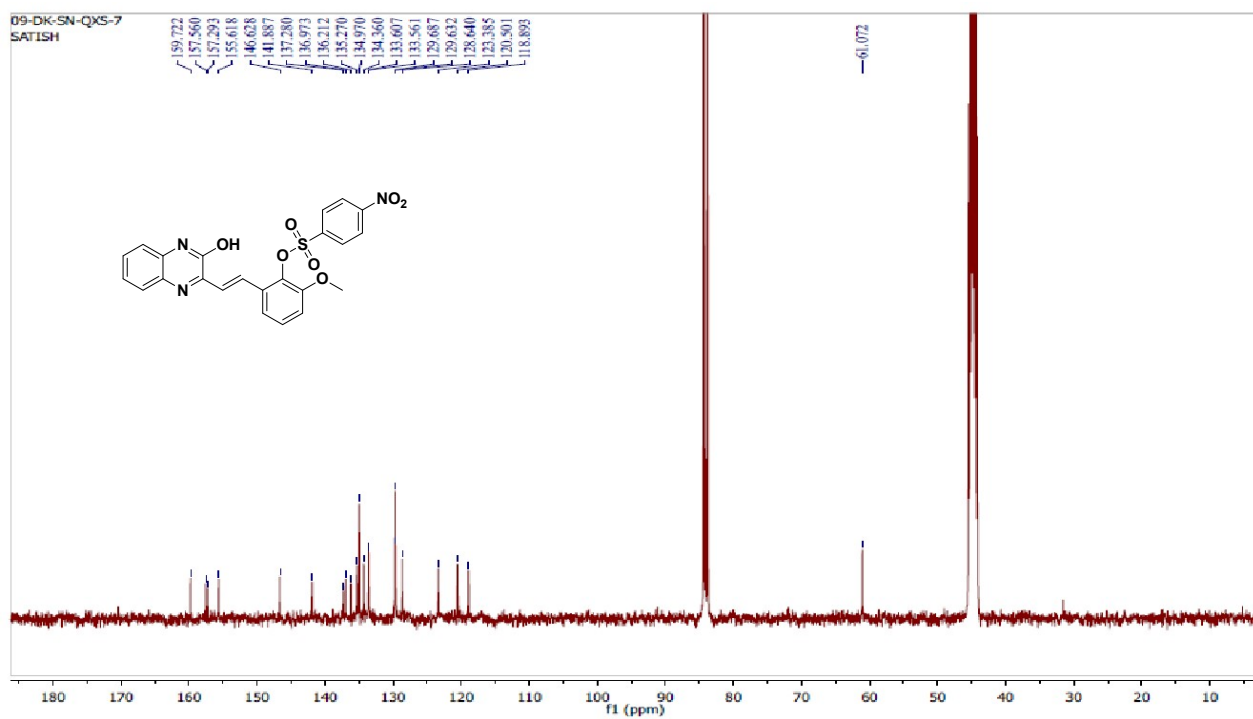

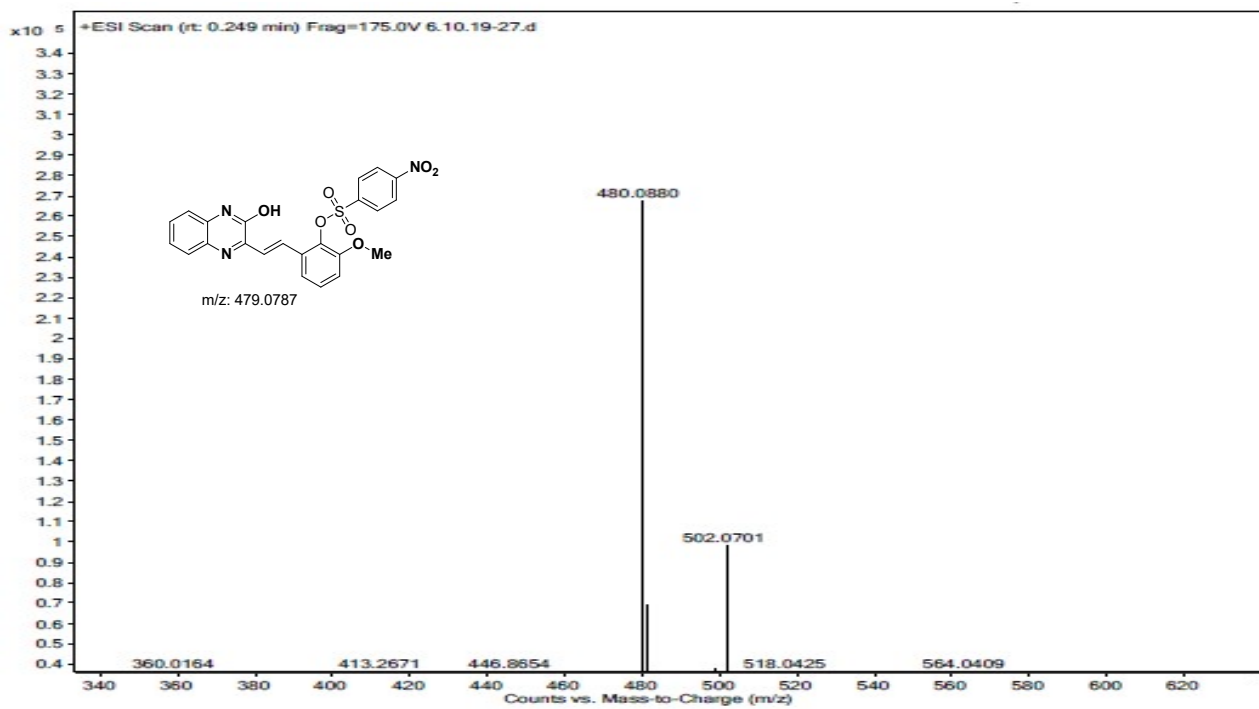

*5-(2-(3-Hydroxyquinoxalin-2-yl)vinyl)-2-methoxyphenyl-4-nitrobenzenesulfonate (5p):*

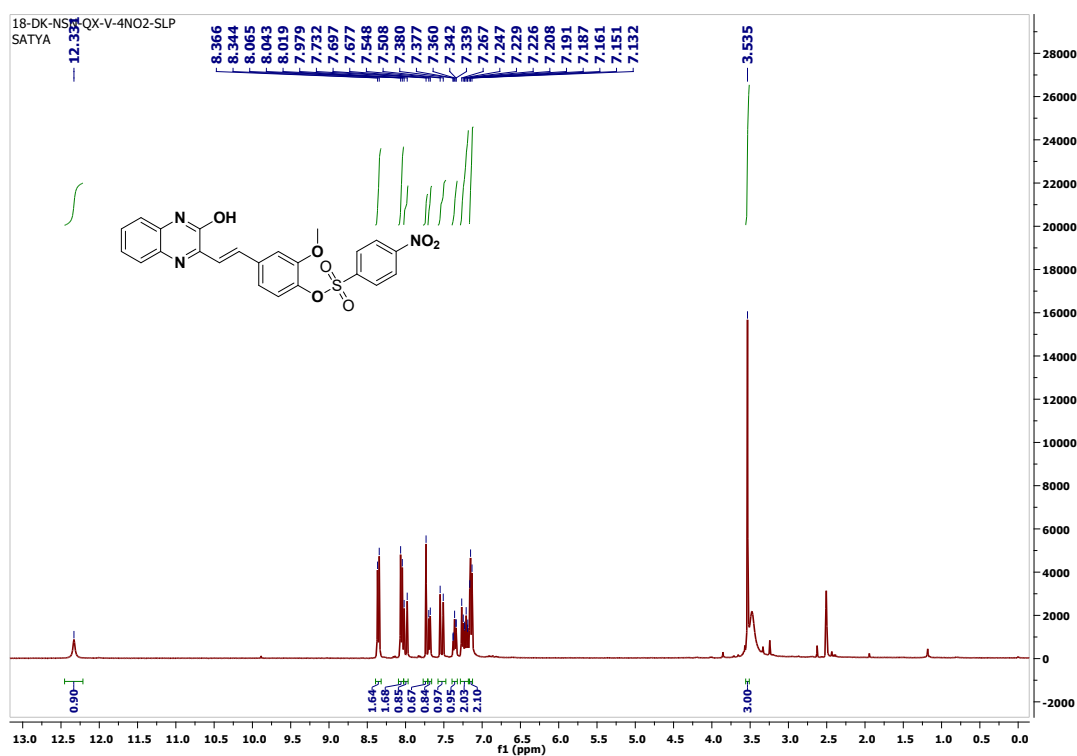



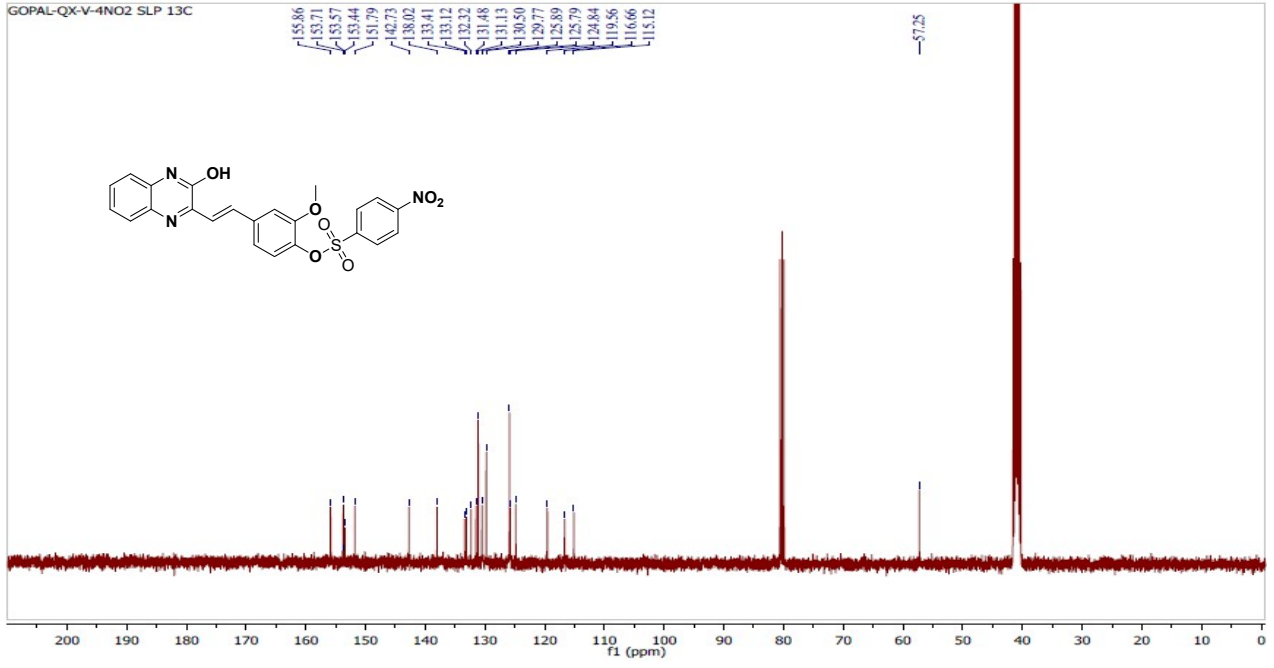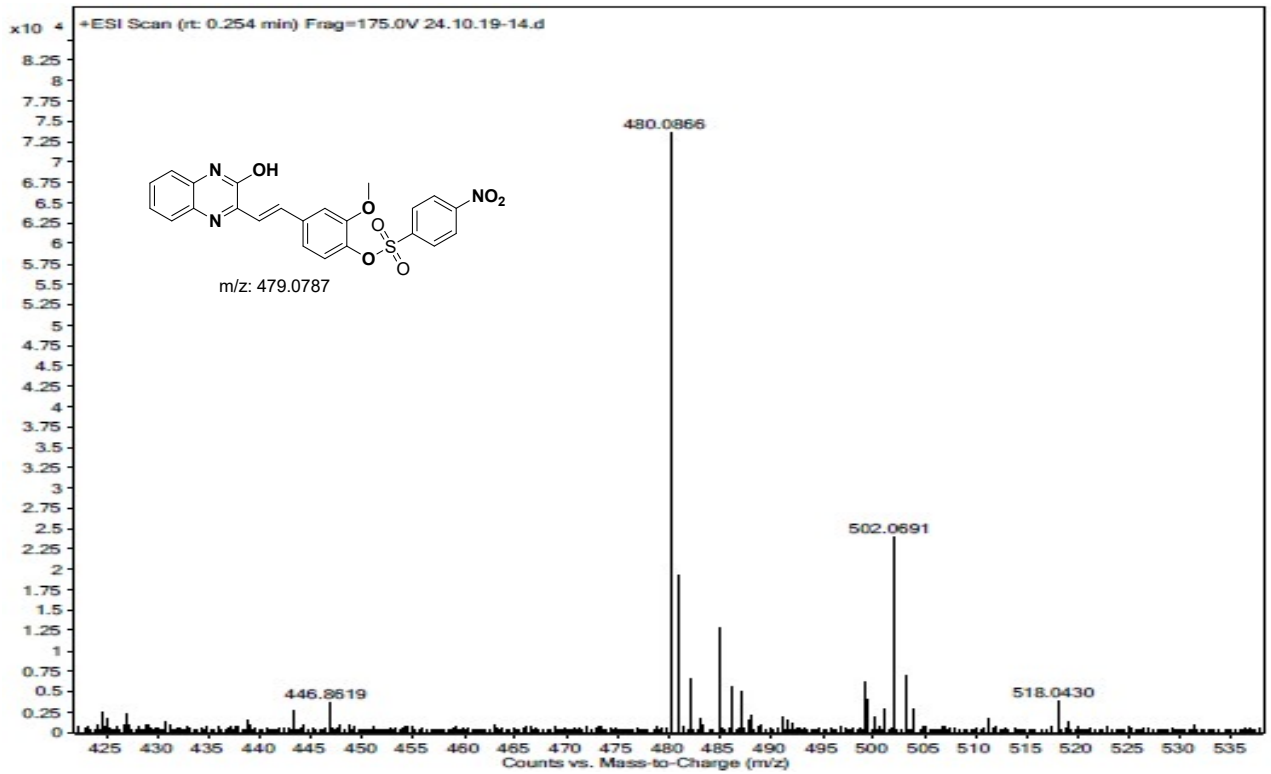

**NOESY-2D NMR of the compound 5e:**

***4-(2-(3-Hydroxyquinoxalin-2-yl)vinyl)phenyl benzenesulfonate (5e):***

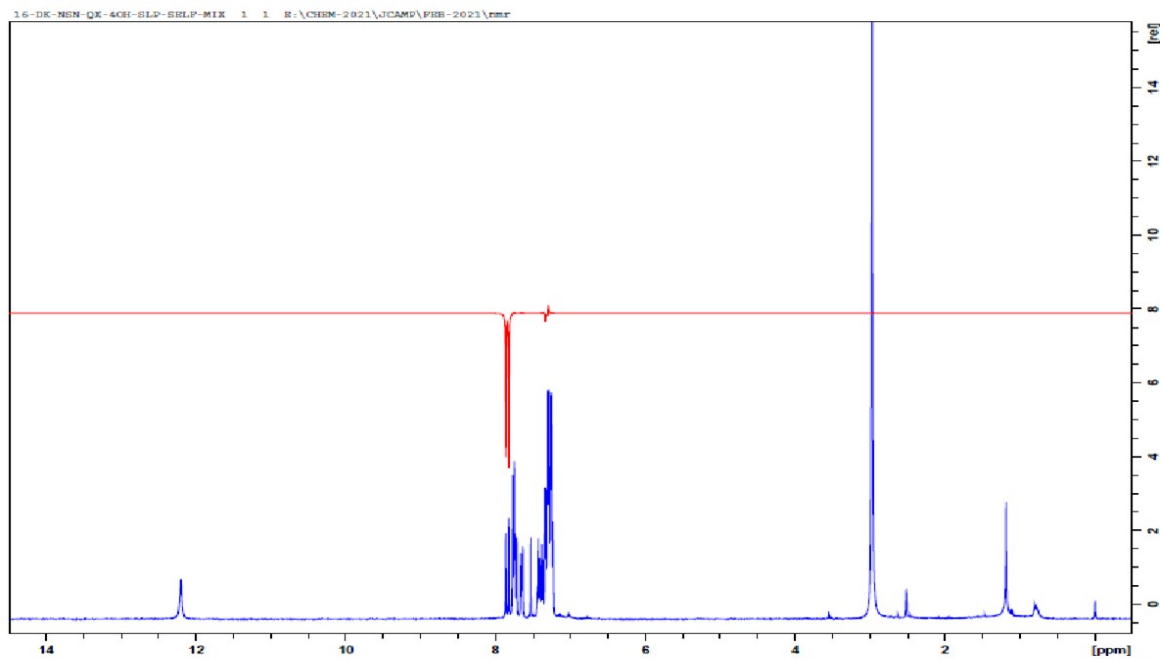

Supplement: d1nj05644a1.pdf [file d1nj05644a1.pdf]
